# Supplementary material for: Photo-induced weak base-catalyzed synthesis of α-haloboronates from vinylboronates and polyfluoroalkyl halides
Source: Royal Society of Chemistry journal article supplement (doi:10.1039/d1qo00169h), 2021-01-01

## Supporting Information

### Photo-Induced Weak Base-Catalyzed Synthesis of $\alpha$ -Haloboronates from Vinylboronates and Polyfluoroalkyl Halides

Tongchang Fang,<sup>1</sup> Jian Qiu,<sup>1</sup> Kai Yang,<sup>1</sup> Qiuling Song\*<sup>1,2</sup>

<sup>1</sup> Key Laboratory of Molecule Synthesis and Function Discovery, Fujian Province University, College of Chemistry at Fuzhou University Fuzhou, Fujian, 350108 (China)

<sup>2</sup> Institute of Next Generation Matter Transformation, College of Materials Science Engineering at Huaqiao University 668 Jimei Boulevard, Xiamen, Fujian, 361021 (China)

E-mail: qsong@hqu.edu.cn

### Contents

|                                                                             |    |
|-----------------------------------------------------------------------------|----|
| Supporting Information .....                                                | 1  |
| 1. General methods .....                                                    | 2  |
| 2. Preparation of the starting materials .....                              | 3  |
| 3. Typical procedure for the synthesis of $\alpha$ -haloboronates .....     | 7  |
| 4. Synthetic applicability .....                                            | 19 |
| 5. Mechanism studies .....                                                  | 26 |
| 5.1. Radical inhibition experiment with TEMPO .....                         | 26 |
| 5.2. Radical clock experiments .....                                        | 27 |
| 5.3. UV-vis spectroscopic measurement .....                                 | 29 |
| 5.4. Comparative Experiment .....                                           | 30 |
| 5.5. Comparison with or without KOAc .....                                  | 32 |
| 5.6. Catalyst cycle experiment .....                                        | 33 |
| 6. Unsuccessful examples .....                                              | 34 |
| 7. References .....                                                         | 35 |
| 8. Crystal data and structure refinement for <b>3m</b> (CCDC 2058412) ..... | 35 |
| 9. Copies of NMR spectra of all new compounds .....                         | 37 |

## 1. General methods

All experiments were conducted with a schlenk tube. Flash column chromatography was performed over silica gel (200-300 mesh).  $^1\text{H}$  NMR and  $^{13}\text{C}$  NMR spectra were recorded at ambient temperature using Bruker Ascend<sup>TM</sup> 400 (400 MHz) spectrometer, Bruker AVANCE NEO 600 (600 MHz) spectrometer or JEOL JNM-ECZ500R/S1 (500 MHz) spectrometer. Chemical shifts (in ppm) were referenced to  $\text{CDCl}_3$  ( $\delta = 7.26$  ppm),  $\text{MeCN-d}_3$  ( $\delta = 1.94$  ppm) as internal standards.  $^{13}\text{C}$  NMR spectra were obtained by using the same NMR spectrometers and were calibrated with  $\text{CDCl}_3$  ( $\delta = 77.0$  ppm),  $\text{MeCN-d}_3$  ( $\delta = 1.32$  ppm). Data for  $^1\text{H}$  NMR are recorded as following abbreviations: multiplicity (s = singlet, d = doublet, t = triplet, q = quarter, m = multiplet), coupling constant ( $J$ , Hz). HRMS data were obtained on Thermo Scientific Orbitrap Elite Mass Spectrometer with an ESI source (Ion Trap) or Agilent 7250 GC/Q-TOF. Analytical thin-layer chromatography (TLC) was carried out on Merck 60 F254 pre-coated silica gel plate (0.2 mm thickness). Visualization was accomplished by UV light (254 nm), or  $\text{KMnO}_4$  staining solutions followed by heating, also by Gas chromatograph-Mass spectrometer analysis (GC-MS). No attempts were made to optimize yields for substrate synthesis. Unless otherwise noted, materials obtained from commercial suppliers were used without further purification.

## 2. Preparation of the starting materials

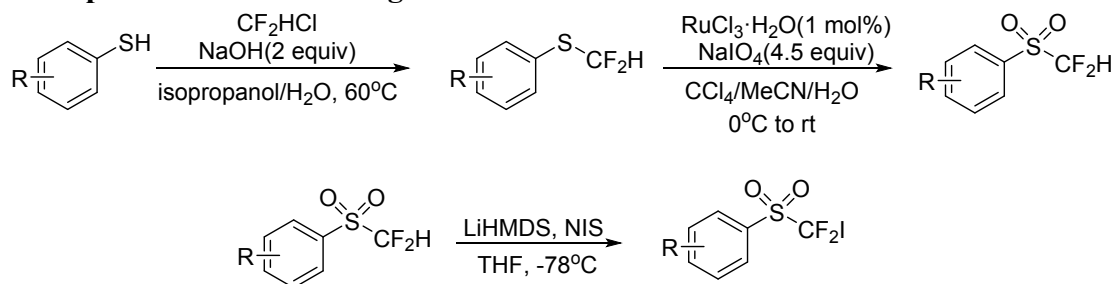

The iodine difluoroaryl sulfone **1n-1u** were prepared according to the reference<sup>1,2</sup>.

**Step 1:** Benzenethiol **6** (10 mmol) was dissolved in isopropanol (15 ml). The reaction mixture was warmed up to 60 °C, and solution of NaOH (800 mg, 20 mmol) in H<sub>2</sub>O was added dropwise. A balloon was attached to the reaction vessel and CF<sub>2</sub>HCl gas was bubbled into the stirred mixture from a cylinder for 4 h. When all of the starting material was converted into the product, the mixture was cooled down to room temperature, poured in water, and the aqueous layer was extracted with Et<sub>2</sub>O, washed with brine, dried over Na<sub>2</sub>SO<sub>4</sub> and concentrated under reduced pressure. The crude product was directly used in the next step without further purification.

**Step 2:** To a mixture of difluoromethyl aryl sulfide (9 mmol), CCl<sub>4</sub> (8 ml), CH<sub>3</sub>CN (8 ml), H<sub>2</sub>O (14 ml) and RuCl<sub>3</sub>·H<sub>2</sub>O (10 mg, 0.04 mmol) at 0 °C, NaIO<sub>4</sub> was added (7.7 g, 36 mmol). After stirring at 0 °C to RT for 1.5 hours, the resulting reaction mixture was extracted with Et<sub>2</sub>O. The combined organic phase was washed successively with saturated NaHCO<sub>3</sub> and saturated brine, and then dried over anhydrous Na<sub>2</sub>SO<sub>4</sub>, concentrated under reduced pressure. The crude product was directly used in the next step without further purification.

**Step 3:** Difluoromethyl aryl sulfone (5 mmol, 1.0 equiv) and NIS (15 mmol, 3.375 g, 3.0 equiv) were added to a dry Schlenk tube. The flask was evacuated and backfilled with pure Ar for 3 times. Then THF (20 mL) was added with syringe under Ar atmosphere. The mixture was cooled to -78 °C. LiHMDS (1.0 M in THF, 15 mmol, 15 mL, 3.0 equiv) was added with syringe under Ar atmosphere in 15 min. The mixture was stirred at -78 °C for 3 h (monitored by GC-MS). After the reaction was complete, the mixture was quenched by saturated aqueous solution of NH<sub>4</sub>Cl (10 mL). After the

mixture was warmed to room temperature, the aqueous layer was extracted with Et<sub>2</sub>O for 3 times (30 mL × 3). Then the organic phase was combined and dried over anhydrous MgSO<sub>4</sub>. The solvent was removed under reduced pressure and the residue was purified by column chromatography to afford the desired product. The following compounds are synthesized according to this method.

### 1-((difluoriodomethyl)sulfonyl)-4-(trifluoromethyl)benzene (1n)

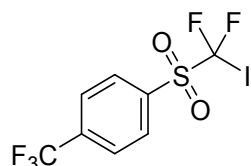

White solid, mp: 91-92 °C

<sup>1</sup>H NMR (500 MHz, Chloroform-*d*) δ 8.15 (d, *J* = 8.2 Hz, 2H), 7.91 (d, *J* = 8.5 Hz, 2H).

<sup>19</sup>F NMR (471 MHz, Chloroform-*d*) δ -52.12, -63.37.

<sup>13</sup>C NMR (126 MHz, Chloroform-*d*) δ 137.5 (q, *J* = 33.4 Hz), 132.0, 126.8 (q, *J* = 3.7 Hz), 122.8 (q, *J* = 273.5 Hz), 101.8 (t, *J* = 355.1 Hz).

HRMS (ESI) calcd for C<sub>8</sub>H<sub>5</sub>F<sub>5</sub>IO<sub>2</sub>S (M+H<sup>+</sup>): 386.8970, found: 386.8986.

### 1-((difluoriodomethyl)sulfonyl)-4-fluorobenzene (1o)

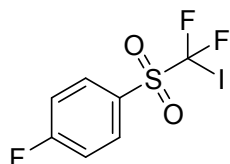

White solid, mp: 84-85 °C

<sup>1</sup>H NMR (500 MHz, Chloroform-*d*) δ 8.06 – 7.99 (m, 2H), 7.37 – 7.29 (m, 2H).

<sup>19</sup>F NMR (471 MHz, Chloroform-*d*) δ -52.06, -98.36.

<sup>13</sup>C NMR (126 MHz, Chloroform-*d*) δ 167.5 (d, *J* = 260.8 Hz), 134.4 (d, *J* = 10.3 Hz), 123.8, 117.3 (d, *J* = 23.0 Hz), 102.0 (t, *J* = 354.7 Hz).

HRMS (EI) calcd for C<sub>7</sub>H<sub>5</sub>F<sub>3</sub>IO<sub>2</sub>S: 335.8929, found: 335.8930.

### 1-chloro-4-((difluoriodomethyl)sulfonyl)benzene (1p)<sup>3</sup>

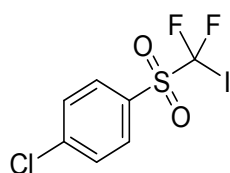

White solid, mp: 104-105 °C

$^1\text{H}$  NMR (500 MHz, Chloroform-*d*)  $\delta$  7.93 (d,  $J$  = 8.4 Hz, 2H), 7.62 (d,  $J$  = 8.7 Hz, 2H).

$^{19}\text{F}$  NMR (471 MHz, Chloroform-*d*)  $\delta$  -52.05.

$^{13}\text{C}$  NMR (126 MHz, Chloroform-*d*)  $\delta$  143.4, 132.7, 130.1, 126.4, 102.0 (t,  $J$  = 354.9 Hz).

HRMS (ESI) calcd for  $\text{C}_7\text{H}_4\text{ClF}_2\text{IO}_2\text{SNa}$  ( $\text{M}+\text{Na}^+$ ): 374.8525, found: 374.8521.

### 1-bromo-4-((difluoriodomethyl)sulfonyl)benzene (1q)

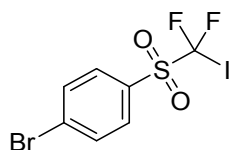

White solid, mp: 132-133 °C

$^1\text{H}$  NMR (500 MHz, Chloroform-*d*)  $\delta$  7.86 – 7.83 (m, 2H), 7.81 – 7.77 (m, 2H).

$^{19}\text{F}$  NMR (471 MHz, Chloroform-*d*)  $\delta$  -52.02.

$^{13}\text{C}$  NMR (126 MHz, Chloroform-*d*)  $\delta$  133.2, 132.7, 132.3, 127.0, 102.0 (t,  $J$  = 355.0 Hz).

HRMS (ESI) calcd for  $\text{C}_7\text{H}_4\text{BrF}_2\text{IO}_2\text{SNa}$  ( $\text{M}+\text{Na}^+$ ): 418.8020, found: 418.8020.

### 1-chloro-3-((difluoriodomethyl)sulfonyl)benzene (1r)

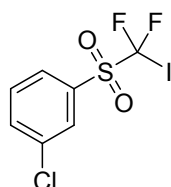

White solid, mp: 66-67 °C

$^1\text{H}$  NMR (500 MHz, Chloroform-*d*)  $\delta$  7.98 (t,  $J$  = 2.0 Hz, 1H), 7.89 (dd,  $J$  = 7.9, 0.9 Hz, 1H), 7.78 (ddd,  $J$  = 8.0, 2.1, 1.0 Hz, 1H), 7.59 (t,  $J$  = 8.0 Hz, 1H).

$^{19}\text{F}$  NMR (471 MHz, Chloroform-*d*)  $\delta$  -51.90.

$^{13}\text{C}$  NMR (126 MHz, Chloroform-*d*)  $\delta$  136.3, 136.0, 131.1, 130.9, 129.9, 129.5, 101.9 (t,  $J$  = 355.2 Hz).

HRMS (ESI) calcd for  $\text{C}_7\text{H}_5\text{ClF}_2\text{IO}_2\text{S}$  ( $\text{M}+\text{H}^+$ ): 351.8633, found: 351.8630.

### 1-((difluoriodomethyl)sulfonyl)-4-methoxybenzene (1s)

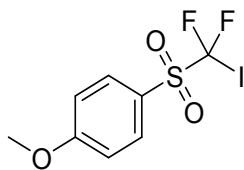

White solid, mp: 104-105 °C

$^1\text{H}$  NMR (500 MHz, Chloroform-*d*)  $\delta$  7.90 (d,  $J = 9.0$  Hz, 2H), 7.07 (d,  $J = 9.0$  Hz, 2H), 3.92 (s, 3H).

$^{19}\text{F}$  NMR (471 MHz, Chloroform-*d*)  $\delta$  -51.84.

$^{13}\text{C}$  NMR (126 MHz, Chloroform-*d*)  $\delta$  165.9, 133.7, 118.4, 115.1, 102.7 (t,  $J = 354.9$  Hz), 55.9.

HRMS (ESI) calcd for  $\text{C}_8\text{H}_8\text{F}_2\text{IO}_3\text{S}$  ( $\text{M}+\text{H}^+$ ): 348.9201, found: 348.9201.

#### 1-((difluoriodomethyl)sulfonyl)-3-methoxybenzene (1t)

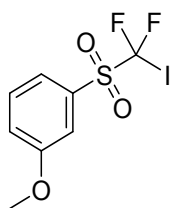

White solid, mp: 76-77 °C

$^1\text{H}$  NMR (500 MHz, Chloroform-*d*)  $\delta$  7.44 (d,  $J = 7.6$  Hz, 1H), 7.39 (t,  $J = 8.0$  Hz, 1H), 7.30 (s, 1H), 7.18 (ddd,  $J = 8.3, 2.5, 1.1$  Hz, 1H), 3.74 (s, 3H).

$^{19}\text{F}$  NMR (471 MHz, Chloroform-*d*)  $\delta$  -51.91.

$^{13}\text{C}$  NMR (126 MHz, Chloroform-*d*)  $\delta$  160.2, 130.6, 129.1, 123.6, 122.9, 115.3, 102.6 (t,  $J = 355.5$  Hz), 55.8.

HRMS (ESI) calcd for  $\text{C}_8\text{H}_8\text{F}_2\text{IO}_3\text{S}$  ( $\text{M}+\text{H}^+$ ): 348.9201, found: 348.9201.

#### 4-((difluoriodomethyl)sulfonyl)-1,2-dimethoxybenzene (1u)

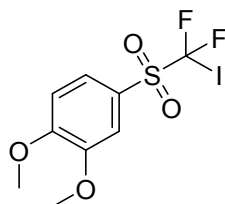

White solid, mp: 120-121 °C

$^1\text{H}$  NMR (500 MHz, Chloroform-*d*)  $\delta$  7.61 (d,  $J = 8.5$  Hz, 1H), 7.33 (s, 1H), 7.03 (d,  $J$

= 7.6 Hz, 1H), 3.97 (s, 3H), 3.92 (s, 3H).

<sup>19</sup>F NMR (471 MHz, Chloroform-*d*) δ -51.65.

<sup>13</sup>C NMR (126 MHz, Chloroform-*d*) δ 155.6, 149.5, 126.4, 118.4, 112.5, 111.1, 102.6 (t, *J* = 354.9 Hz), 56.4, 56.3.

HRMS (ESI) calcd for C<sub>9</sub>H<sub>10</sub>F<sub>2</sub>IO<sub>4</sub>S (M+H<sup>+</sup>): 378.9307, found: 378.9306.

### 3. Typical procedure for the synthesis of α-haloboronates

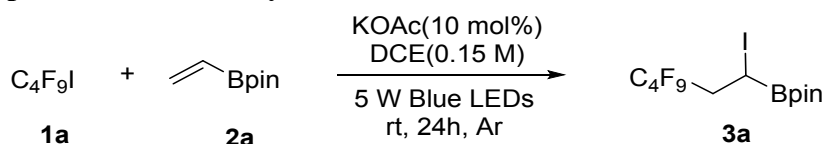

In air, a 25 mL schlenk tube was charged with KOAc (0.03 mmol, 3 mg, 10 mol%). The tube was evacuated and filled with Argon for three cycles. Then, 1,1-Dichloroethane (2 mL), Vinyl borate pinacol ester (**2a**) (0.3 mmol, 52 uL, 1.0 equiv), Perfluoroiodobutane (**1a**) (0.6 mmol, 105 uL, 2.0 equiv) were added to the tube at room temperature. The reaction was allowed to stir under Blue LEDs irradiation at room temperature. After 24 hours, the crude reaction mixture was concentrated in vacuo and purified by column chromatography (*n*-pentane: ethyl acetate = 30:1) to afford the desired product.

#### 4,4,5,5-tetramethyl-2-(3,3,4,4,4-pentafluoro-1-iodobutyl)-1,3,2-dioxaborolane (**3b**)

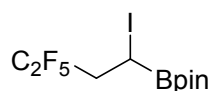

Yellow liquid, Flash column chromatography conditions: *n*-pentane: ethyl acetate = 30:1; Yield: 100.7 mg (84%);

<sup>1</sup>H NMR (500 MHz, Chloroform-*d*) δ 3.33 (dd, *J* = 11.8, 4.5 Hz, 1H), 2.93 – 2.77 (m, 1H), 2.66 – 2.52 (m, 1H), 1.24 (d, *J* = 7.0 Hz, 12H).

<sup>19</sup>F NMR (471 MHz, Chloroform-*d*) δ -85.43, -117.79 – -118.30 (m).

<sup>13</sup>C NMR (126 MHz, Chloroform-*d*) δ 118.6 (qt, *J* = 286.0, 35.91 Hz), 115.2 (tq, *J* = 254.52, 37.8 Hz), 84.5, 37.0 (t, *J* = 21.3 Hz), 24.2, 24.0.

<sup>11</sup>B NMR (128 MHz, Chloroform-*d*) δ 31.4.

HRMS (ESI) calcd for C<sub>10</sub>H<sub>16</sub>BF<sub>5</sub>IO<sub>2</sub> (M+H<sup>+</sup>): 401.0203, found: 401.0203.

**2-(3,3,4,4,5,5,5-heptafluoro-1-iodopentyl)-4,4,5,5-tetramethyl-1,3,2 dioxaborolane (3c)**

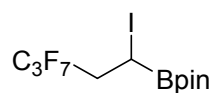

Yellow liquid, Flash column chromatography conditions: *n*-pentane: ethyl acetate = 30:1; Yield: 103.9 mg (77%);

$^1\text{H}$  NMR (500 MHz, Chloroform-*d*)  $\delta$  3.36 (dd,  $J = 11.8, 4.4$  Hz, 1H), 2.98 – 2.82 (m, 1H), 2.70 – 2.55 (m, 1H), 1.25 (d,  $J = 8.2$  Hz, 12H).

$^{19}\text{F}$  NMR (471 MHz, Chloroform-*d*)  $\delta$  -80.45 (t,  $J = 10.0$  Hz), -114.19 – -115.91 (m), -127.84.

$^{13}\text{C}$  NMR (126 MHz, Chloroform-*d*)  $\delta$  121.5 – 105.7 (m), 84.5, 37.1 (t,  $J = 21.4$  Hz), 24.2, 24.0.

$^{11}\text{B}$  NMR (128 MHz, Chloroform-*d*)  $\delta$  31.4.

HRMS (ESI) calcd for  $\text{C}_{11}\text{H}_{16}\text{BF}_7\text{IO}_2$  ( $\text{M}+\text{H}^+$ ): 451.0171, found: 451.0181.

**4,4,5,5-tetramethyl-2-(3,3,4,4,5,5,6,6,6-nonafluoro-1-iodohexyl)-1,3,2-dioxaborolane (3a)**

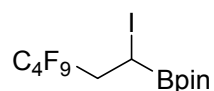

Yellow liquid, Flash column chromatography conditions: *n*-pentane: ethyl acetate = 30:1; Yield: 114.1 mg (76%);

$^1\text{H}$  NMR (500 MHz, Chloroform-*d*)  $\delta$  3.36 (dd,  $J = 11.9, 4.3$  Hz, 1H), 2.99 – 2.83 (m, 1H), 2.71 – 2.56 (m, 1H), 1.25 (d,  $J = 8.6$  Hz, 12H).

$^{19}\text{F}$  NMR (471 MHz, Chloroform-*d*)  $\delta$  -81.08 (t,  $J = 9.7$  Hz), -113.51 – -115.14 (m), -124.47 – -124.65 (m), -125.95 – -126.04 (m).

$^{13}\text{C}$  NMR (126 MHz, Chloroform-*d*)  $\delta$  121.1 – 105.7 (m), 84.5, 37.3 (t,  $J = 21.4$  Hz), 24.1, 23.9.

$^{11}\text{B}$  NMR (128 MHz, Chloroform-*d*)  $\delta$  31.3.

HRMS (ESI) calcd for  $\text{C}_{12}\text{H}_{16}\text{BF}_9\text{IO}_2$  ( $\text{M}+\text{H}^+$ ): 501.0139, found: 501.0136.

**4,4,5,5-tetramethyl-2-(3,3,4,4,5,5,6,6,7,7,7-undecafluoro-1-iodoheptyl)-1,3,2-dioxaborolane (3d)**



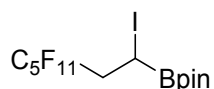

Yellow liquid, Flash column chromatography conditions: *n*-pentane: ethyl acetate = 30:1; Yield: 118.7 mg (72%);

<sup>1</sup>H NMR (500 MHz, Chloroform-*d*) δ 3.36 (dd, *J* = 11.9, 4.3 Hz, 1H), 3.00 – 2.84 (m, 1H), 2.71 – 2.56 (m, 1H), 1.25 (d, *J* = 8.6 Hz, 12H).

<sup>19</sup>F NMR (471 MHz, Chloroform-*d*) δ -80.89 (t, *J* = 10.0 Hz), -113.27 – -115.00 (m), -122.59 – -122.71 (m), -123.75 – -123.90 (m), -126.20 – -126.40 (m).

<sup>13</sup>C NMR (126 MHz, Chloroform-*d*) δ 121.3 – 105.7 (m), 84.5, 37.4 (t, *J* = 21.4 Hz), 24.1, 23.9.

<sup>11</sup>B NMR (128 MHz, Chloroform-*d*) δ 31.3.

HRMS (EI) calcd for C<sub>13</sub>H<sub>15</sub>BF<sub>11</sub>IO<sub>2</sub>: 500.0034, found: 500.0037.

**4,4,5,5-tetramethyl-2-(3,3,4,4,5,5,6,6,7,7,8,8,8-tridecafluoro-1-iodooctyl)-1,3,2-dioxaborolane (3e)**

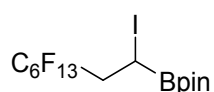

Yellow liquid, Flash column chromatography conditions: *n*-pentane: ethyl acetate = 30:1; Yield: 133.3 mg (74%);

<sup>1</sup>H NMR (500 MHz, Chloroform-*d*) δ 3.37 (dd, *J* = 11.9, 4.3 Hz, 1H), 3.00 – 2.84 (m, 1H), 2.71 – 2.57 (m, 1H), 1.26 (d, *J* = 8.6 Hz, 12H).

<sup>19</sup>F NMR (471 MHz, Chloroform-*d*) δ -80.86 (t, *J* = 9.9 Hz), -113.30 – -114.92 (m), -121.79 – -121.90 (m), -122.83 – -122.90 (m), -123.55 – -123.70 (m), -126.10 – -126.926 (m).

<sup>13</sup>C NMR (101 MHz, Chloroform-*d*) δ 124.7 – 105.0 (m), 84.5, 37.5 (t, *J* = 21.5 Hz), 24.2, 24.0.

<sup>11</sup>B NMR (128 MHz, Chloroform-*d*) δ 31.2.

HRMS (EI) calcd for C<sub>14</sub>H<sub>15</sub>BF<sub>13</sub>IO<sub>2</sub>: 600.0002, found: 600.0005.

**2-(3,3,4,4,5,5,6,6,7,7,8,8,9,9,10,10,10-heptadecafluoro-1-iododecyl)-4,4,5,5-tetramethyl-1,3,2-dioxaborolane (3f)**

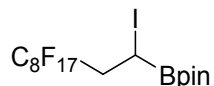

Yellow liquid, Flash column chromatography conditions: *n*-pentane: ethyl acetate = 30:1; Yield: 163.8 mg (78%);

$^1\text{H}$  NMR (500 MHz, Chloroform-*d*)  $\delta$  3.36 (dd,  $J = 11.9, 4.3$  Hz, 1H), 3.00 – 2.84 (m, 0H), 2.71 – 2.56 (m, 1H), 1.25 (d,  $J = 8.7$  Hz, 12H).

$^{19}\text{F}$  NMR (471 MHz, Chloroform-*d*)  $\delta$  -112.15 – -115.21 (m), -121.05 – -121.80 (m), -121.80 – -122.48 (m), -122.58 – -123.36 (m), -123.43 – -124.06 (m), -126.03 – -126.53 (m).

$^{13}\text{C}$  NMR (101 MHz, Chloroform-*d*)  $\delta$  125.2 – 105.0 (m), 84.5, 37.5 (t,  $J = 21.5$  Hz), 24.1, 24.0.

$^{11}\text{B}$  NMR (128 MHz, Chloroform-*d*)  $\delta$  31.2.

HRMS (EI) calcd for  $\text{C}_{16}\text{H}_{15}\text{BF}_{17}\text{IO}_2$ : 699.9938, found: 699.9947.

**2-(3,3,4,4,5,5,6,6,7,7,8,8,9,9,10,10,11,11,12,12-henicosafluoro-1-iodododecyl)-4,4,5,5-tetramethyl-1,3,2-dioxaborolane (3g)**

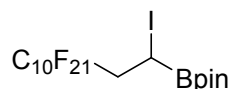

Yellow liquid, Flash column chromatography conditions: *n*-pentane: ethyl acetate = 30:1; Yield: 194.4 mg (81%);

$^1\text{H}$  NMR (500 MHz, Chloroform-*d*)  $\delta$  3.37 (dd,  $J = 11.9, 4.4$  Hz, 1H), 3.00 – 2.84 (m, 0H), 2.72 – 2.57 (m, 1H), 1.26 (d,  $J = 8.6$  Hz, 12H).

$^{19}\text{F}$  NMR (471 MHz, Chloroform-*d*)  $\delta$  -80.82 (t,  $J = 9.9$  Hz), -113.29 – -114.87 (m), -121.39 – -122.11 (m), -122.72, -123.58, -125.92 – -126.37 (m).

$^{13}\text{C}$  NMR (126 MHz, Chloroform-*d*)  $\delta$  121.1– 105.9 (m), 84.5, 37.4 (t,  $J = 21.4$  Hz), 24.1, 23.9.

$^{11}\text{B}$  NMR (128 MHz, Chloroform-*d*)  $\delta$  32.1.

HRMS (EI) calcd for  $\text{C}_{18}\text{H}_{15}\text{BF}_{21}\text{IO}_2$ : 799.9874, found: 799.9878.

**4,4,5,5-tetramethyl-2-(3,4,4,4-tetrafluoro-1-iodo-3-(trifluoromethyl)butyl)-1,3,2-dioxaborolane (3h)**

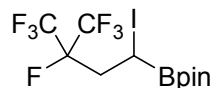

Yellow liquid, Flash column chromatography conditions: *n*-pentane: ethyl acetate = 30:1; Yield: 91.8 mg (68%);

$^1\text{H}$  NMR (500 MHz, Chloroform-*d*)  $\delta$  7.24 (dd,  $J = 12.6, 3.9$  Hz, 1H), 6.90 – 6.78 (m, 1H), 6.55 – 6.43 (m, 1H), 5.11 (d,  $J = 7.9$  Hz, 12H).

$^{19}\text{F}$  NMR (471 MHz, Chloroform-*d*)  $\delta$  -76.16 (m), -77.18 (m), -186.00 – -186.23 (m).

$^{13}\text{C}$  NMR (126 MHz, Chloroform-*d*)  $\delta$  124.6– 116.8 (m), 91.7 (dp,  $J = 204.9, 32.2$  Hz), 84.4, 34.9(d,  $J = 19.4$  Hz), 24.1, 24.0

$^{11}\text{B}$  NMR (128 MHz, Chloroform-*d*)  $\delta$  31.6.

HRMS (ESI) calcd for  $\text{C}_{11}\text{H}_{16}\text{BF}_7\text{IO}_2$  ( $\text{M}+\text{H}^+$ ): 451.0171, found: 451.0175.

**2-(4-chloro-3,3,4,4-tetrafluoro-1-iodobutyl)-4,4,5,5-tetramethyl-1,3,2-dioxaborolane (3i)**

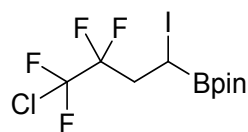

Yellow liquid, Flash column chromatography conditions: *n*-pentane: ethyl acetate = 30:1; Yield: 77.4 mg (62%);

$^1\text{H}$  NMR (500 MHz, Chloroform-*d*)  $\delta$  3.35 (dd,  $J = 11.8, 4.4$  Hz, 1H), 2.98 – 2.82 (m, 1H), 2.72 – 2.57 (m, 1H), 1.25 (d,  $J = 7.2$  Hz, 12H).

$^{19}\text{F}$  NMR (471 MHz, Chloroform-*d*)  $\delta$  -71.25, -112.99 – -114.67 (m).

$^{13}\text{C}$  NMR (126 MHz, Chloroform-*d*)  $\delta$  123.0 (tt,  $J = 298.7, 37.2$  Hz), 116.8 (tt,  $J = 256.1, 33.7$  Hz), 84.4, 37.1(t,  $J = 21.7$  Hz), 24.2, 24.0.

$^{11}\text{B}$  NMR (128 MHz, Chloroform-*d*)  $\delta$  31.5.

HRMS (EI) calcd for  $\text{C}_{10}\text{H}_{15}\text{BClF}_{10}\text{IO}_2$ : 415.9834, found: 415.9843.

**2-(8-chloro-3,3,4,4,5,5,6,6,7,7,8,8-dodecafluoro-1-iodooctyl)-4,4,5,5-tetramethyl-1,3,2-dioxaborolane (3j)**

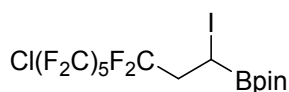

Yellow liquid, Flash column chromatography conditions: *n*-pentane: ethyl acetate =

30:1; Yield: 125.6 mg (68%);

$^1\text{H}$  NMR (500 MHz, Chloroform-*d*)  $\delta$  3.36 (dd,  $J = 11.9, 4.3$  Hz, 1H), 2.99 – 2.83 (m, 1H), 2.70 – 2.56 (m, 1H), 1.25 (d,  $J = 8.6$  Hz, 12H).

$^{19}\text{F}$  NMR (471 MHz, Chloroform-*d*)  $\delta$  -68.10 (t,  $J = 13.3$  Hz), -113.32 – -114.96 (m), -120.22, -121.36, -121.74, -123.65.

$^{13}\text{C}$  NMR (126 MHz, Chloroform-*d*)  $\delta$  124.8 – 106.4 (m), 84.5, 37.5 (t,  $J = 21.4$  Hz), 24.1, 24.0.

$^{11}\text{B}$  NMR (128 MHz, Chloroform-*d*)  $\delta$  31.2.

HRMS (EI) calcd for  $\text{C}_{14}\text{H}_{15}\text{BClF}_{12}\text{IO}_2$ : 615.9707, found: 615.9710.

**2-(1-iodo-2-(perfluorocyclohexyl)ethyl)-4,4,5,5-tetramethyl-1,3,2-dioxaborolane (3k)**

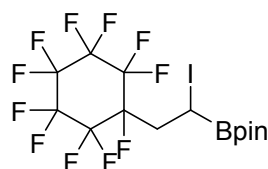

Yellow liquid, Flash column chromatography conditions: *n*-pentane: ethyl acetate = 30:1; Yield: 124.0 mg (76%);

$^1\text{H}$  NMR (500 MHz, Chloroform-*d*)  $\delta$  3.46 (dd,  $J = 12.7, 2.5$  Hz, 1H), 3.12 – 3.02 (m, 1H), 2.84 – 2.72 (m, 1H), 1.25 (d,  $J = 9.8$  Hz, 12H).

$^{19}\text{F}$  NMR (471 MHz, Chloroform-*d*)  $\delta$  -118.26 (dd,  $J = 497.9, 296.7$  Hz), -121.60 – -124.80 (m), -132.58 (dd,  $J = 401.3, 295.9$  Hz), -139.27 (d,  $J = 284.4$  Hz), -142.12 (d,  $J = 286.3$  Hz), -185.57.

$^{13}\text{C}$  NMR (126 MHz, Chloroform-*d*)  $\delta$  112.9 – 104.8 (m), 93.2 – 89.9 (m), 84.5, 32. (d,  $J = 19.5$  Hz), 24.2, 23.9.

$^{11}\text{B}$  NMR (128 MHz, Chloroform-*d*)  $\delta$  31.1.

HRMS (ESI) calcd for  $\text{C}_{14}\text{H}_{16}\text{BF}_{11}\text{IO}_2$  ( $\text{M}+\text{H}^+$ ): 563.0107, found: 563.0108.

**1,1,2,2-tetrafluoro-2-(1,1,2,2-tetrafluoro-4-iodo-4-(4,4,5,5-tetramethyl-1,3,2-dioxaborolan-2-yl)butoxy)ethane-1-sulfonyl fluoride (3l)**

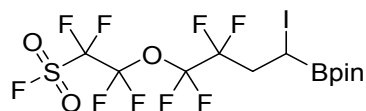

Yellow liquid, Flash column chromatography conditions: *n*-pentane: ethyl acetate = 30:1; Yield: 114.8 mg (66%);

$^1\text{H}$  NMR (500 MHz, Chloroform-*d*)  $\delta$  3.33 (dd,  $J = 11.7, 4.4$  Hz, 2H), 2.93 – 2.77 (m, 1H), 2.65 – 2.50 (m, 1H), 1.25 (d,  $J = 8.5$  Hz, 12H).

$^{19}\text{F}$  NMR (471 MHz, Chloroform-*d*) -45.69 – -45.60 (m), -82.05 – -82.14 (m), -87.07 – -87.80 (m), -111.87 – -112.31 (m), -117.28 – -118.71 (m).

$^{13}\text{C}$  NMR (126 MHz, Chloroform-*d*)  $\delta$  120.0 – 109.5 (m), 84.5, 36.8 (t,  $J = 21.2$  Hz), 24.1, 24.0.

$^{11}\text{B}$  NMR (128 MHz, Chloroform-*d*)  $\delta$  31.3.

HRMS (EI) calcd for  $\text{C}_{12}\text{H}_{15}\text{BF}_9\text{IO}_5\text{S}$ : 579.9634, found: 579.9637.

**2-(3,3-difluoro-1-iodo-3-(phenylsulfonyl)propyl)-4,4,5,5-tetramethyl-1,3,2-dioxaborolane (3m)**

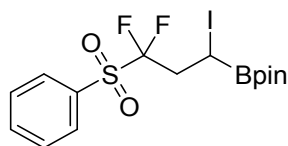

White solid, mp: 94-95 °C, Flash column chromatography conditions: *n*-pentane: ethyl acetate = 30:1; Yield: 113.3 mg (80%);

$^1\text{H}$  NMR (500 MHz, Chloroform-*d*)  $\delta$  7.97 (d,  $J = 7.5$  Hz, 2H), 7.77 (t,  $J = 7.5$  Hz, 1H), 7.62 (t,  $J = 7.9$  Hz, 1H), 3.42 (dd,  $J = 11.0, 5.1$  Hz, 1H), 3.23 – 3.07 (m, 1H), 3.00 – 2.85 (m, 1H), 1.24 (d,  $J = 6.3$  Hz, 12H).

$^{19}\text{F}$  NMR (376 MHz, Chloroform-*d*)  $\delta$  -103.75 (d,  $J = 229.36$  Hz), -103.80 (d,  $J = 229.36$  Hz).

$^{13}\text{C}$  NMR (126 MHz, Chloroform-*d*)  $\delta$  135.5, 132.0, 130.8, 129.4, 123.4 (t,  $J = 287.9$  Hz), 84.4, 35.5 (t,  $J = 19.7$  Hz), 24.2, 24.0.

$^{11}\text{B}$  NMR (128 MHz, Chloroform-*d*)  $\delta$  31.8.

HRMS (ESI) calcd for  $\text{C}_{15}\text{H}_{21}\text{BF}_2\text{IO}_4\text{S}$  ( $\text{M}+\text{H}^+$ ): 473.0261, found: 473.0263.

**2-(3,3-difluoro-1-iodo-3-((4-(trifluoromethyl)phenyl)sulfonyl)propyl)-4,4,5,5-tetramethyl-1,3,2-dioxaborolane (3n)**

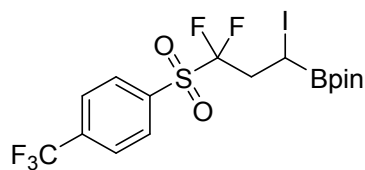

White solid, mp: 93-94 °C, Flash column chromatography conditions: *n*-pentane: ethyl acetate = 30:1; Yield: 103.6 mg (64%);

<sup>1</sup>H NMR (500 MHz, Chloroform-*d*) δ 8.11 (d, *J* = 8.2 Hz, 2H), 7.89 (d, *J* = 8.3 Hz, 2H), 3.42 (dd, *J* = 10.9, 5.1 Hz, 1H), 3.24 – 3.09 (m, 1H), 3.02 – 2.87 (m, 1H), 1.24 (d, *J* = 6.6 Hz, 12H).

<sup>19</sup>F NMR (376 MHz, Chloroform-*d*) δ -63.44, δ -102.56 (d, *J* = 229.36 Hz), -103.21 (d, *J* = 229.36 Hz).

<sup>13</sup>C NMR (126 MHz, Chloroform-*d*) δ 137.0 (q, *J* = 33.3 Hz), 135.7, 131.5, 126.5 (q, *J* = 3.7 Hz), 123.6.

<sup>11</sup>B NMR (128 MHz, Chloroform-*d*) δ 31.8.

HRMS (ESI) calcd for C<sub>16</sub>H<sub>20</sub>BF<sub>5</sub>IO<sub>4</sub>S (M+H<sup>+</sup>): 541.0135, found: 541.0132.

**2-(3,3-difluoro-3-((4-fluorophenyl)sulfonyl)-1-iodopropyl)-4,4,5,5-tetramethyl-1,3,2-dioxaborolane (3o)**

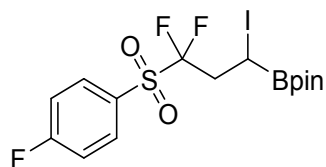

White solid, mp: 77-78 °C, Flash column chromatography conditions: *n*-pentane: ethyl acetate = 30:1; Yield: 104.4 mg (71%);

<sup>1</sup>H NMR (500 MHz, Chloroform-*d*) δ 8.00 (dd, *J* = 8.6, 5.0 Hz, 2H), 7.31 (t, *J* = 8.4 Hz, 2H), 3.42 (dd, *J* = 10.9, 5.1 Hz, 1H), 3.23 – 3.08 (m, 1H), 3.00 – 2.85 (m, 1H), 1.25 (d, *J* = 6.2 Hz, 12H).

<sup>19</sup>F NMR (376 MHz, Chloroform-*d*) δ -99.96, δ -103.10 (d, *J* = 229.36 Hz), -103.75 (d, *J* = 229.36 Hz).

<sup>13</sup>C NMR (126 MHz, Chloroform-*d*) δ 167.1 (d, *J* = 259.5 Hz), 133.8 (d, *J* = 10.1 Hz), 127.9, 123.3 (t, *J* = 287.8 Hz), 116.9 (d, *J* = 22.9 Hz), 84.4, 35.4 (t, *J* = 19.6 Hz), 24.2, 24.0.

$^{11}\text{B}$  NMR (128 MHz, Chloroform-*d*)  $\delta$  31.2.

HRMS (ESI) calcd for  $\text{C}_{15}\text{H}_{20}\text{BF}_3\text{IO}_4\text{S}$  ( $\text{M}+\text{H}^+$ ): 491.0167, found: 491.0169.

**2-(3-((4-chlorophenyl)sulfonyl)-3,3-difluoro-1-iodopropyl)-4,4,5,5-tetramethyl-1,3,2-dioxaborolane (3p)**

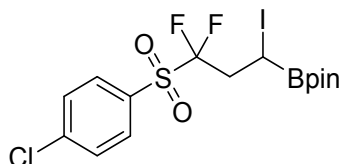

White solid, mp: 109-110 °C, Flash column chromatography conditions: *n*-pentane: ethyl acetate = 30:1; Yield: 115.4 mg (76%);

$^1\text{H}$  NMR (500 MHz, Chloroform-*d*)  $\delta$  7.90 (d,  $J$  = 8.7 Hz, 2H), 7.60 (d,  $J$  = 8.7 Hz, 2H), 3.41 (dd,  $J$  = 10.9, 5.1 Hz, 1H), 3.22 – 3.07 (m, 1H), 2.99 – 2.85 (m, 1H), 1.25 (d,  $J$  = 6.5 Hz, 12H).

$^{19}\text{F}$  NMR (376 MHz, Chloroform-*d*)  $\delta$  -102.98 (d,  $J$  = 229.36 Hz), -103.63 (d,  $J$  = 229.36 Hz).

$^{13}\text{C}$  NMR (126 MHz, Chloroform-*d*)  $\delta$  142.7, 132.2, 130.4, 129.8, 123.4 (t,  $J$  = 288.1 Hz), 84.5, 35.4 (t,  $J$  = 19.6 Hz), 24.2, 24.0.

$^{11}\text{B}$  NMR (128 MHz, Chloroform-*d*)  $\delta$  31.9.

HRMS (ESI) calcd for  $\text{C}_{15}\text{H}_{20}\text{BClF}_2\text{IO}_4\text{S}$  ( $\text{M}+\text{H}^+$ ): 506.9871, found: 506.9873.

**2-(3-((4-bromophenyl)sulfonyl)-3,3-difluoro-1-iodopropyl)-4,4,5,5-tetramethyl-1,3,2-dioxaborolane (3q)**

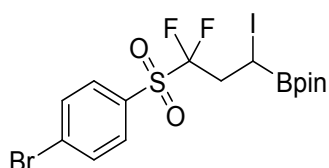

White solid, mp: 123-124 °C, Flash column chromatography conditions: *n*-pentane: ethyl acetate = 30:1; Yield: 95.6 mg (58%);

$^1\text{H}$  NMR (500 MHz, Chloroform-*d*)  $\delta$  7.82 (d,  $J$  = 8.5 Hz, 2H), 7.77 (d,  $J$  = 8.7 Hz, 2H), 3.41 (dd,  $J$  = 11.0, 5.1 Hz, 1H), 3.22 – 3.06 (m, 1H), 2.99 – 2.84 (m, 1H), 1.24 (d,  $J$  = 6.4 Hz, 12H).

$^{13}\text{C}$  NMR (126 MHz, Chloroform-*d*)  $\delta$  132.8, 132.2, 131.5, 130.9, 123.4 (t,  $J$  = 288.1

Hz), 84.5, 35.4 (t,  $J = 19.6$  Hz), 24.2, 24.0.

$^{11}\text{B}$  NMR (128 MHz, Chloroform-*d*)  $\delta$  31.8.

HRMS (ESI) calcd for  $\text{C}_{15}\text{H}_{20}\text{BBrF}_2\text{IO}_4\text{S}$  ( $\text{M}+\text{H}^+$ ): 550.9366, found: 550.9366.

**2-(3-((3-chlorophenyl)sulfonyl)-3,3-difluoro-1-iodopropyl)-4,4,5,5-tetramethyl-1,3,2-dioxaborolane (3r)**

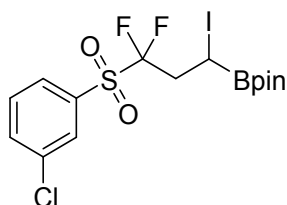

White solid, mp: 66-67 °C, Flash column chromatography conditions: *n*-pentane: ethyl acetate = 30:1; Yield: 106.3 mg (70%);

$^1\text{H}$  NMR (500 MHz, Chloroform-*d*)  $\delta$  7.95 (t,  $J = 2.0$  Hz, 1H), 3.22 – 3.07 (m, 1H), 3.00 – 2.85 (m, 1H), 1.25 (d,  $J = 5.8$  Hz, 12H).

$^{19}\text{F}$  NMR (376 MHz, Chloroform-*d*)  $\delta$  -102.74 (d,  $J = 229.36$  Hz), -103.36 (d,  $J = 229.36$  Hz).

$^{13}\text{C}$  NMR (126 MHz, Chloroform-*d*)  $\delta$  135.8, 135.7, 133.8, 130.6, 128.9, 123.5 (t,  $J = 288.4$  Hz), 84.5, 35.4 (t,  $J = 19.5$  Hz), 24.2, 24.0.

$^{11}\text{B}$  NMR (128 MHz, Chloroform-*d*)  $\delta$  31.2.

HRMS (ESI) calcd for  $\text{C}_{15}\text{H}_{20}\text{BCIF}_2\text{IO}_4\text{S}$  ( $\text{M}+\text{H}^+$ ): 506.9871, found: 506.9869.

**2-(3,3-difluoro-1-iodo-3-((4-methoxyphenyl)sulfonyl)propyl)-4,4,5,5-tetramethyl-1,3,2-dioxaborolane (3s)**

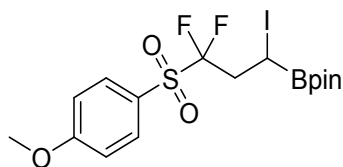

White solid, mp: 122-123 °C, Flash column chromatography conditions: *n*-pentane: ethyl acetate = 30:1; Yield: 137.0 mg (91%);

$^1\text{H}$  NMR (500 MHz, Chloroform-*d*)  $\delta$  7.86 (d,  $J = 8.9$  Hz, 2H), 7.05 (d,  $J = 9.0$  Hz, 2H), 3.89 (s, 3H), 3.40 (dd,  $J = 11.0, 5.0$  Hz, 1H), 3.19 – 3.04 (m, 1H), 2.96 – 2.81 (m, 1H), 1.23 (d,  $J = 6.1$  Hz, 12H).



$^{19}\text{F}$  NMR (376 MHz, Chloroform-*d*)  $\delta$  -103.10 (d,  $J = 229.36$  Hz), -103.75 (d,  $J = 229.36$  Hz).

$^{13}\text{C}$  NMR (126 MHz, Chloroform-*d*)  $\delta$  165.3, 133.0, 123.2 (t,  $J = 287.1$  Hz), 122.7, 114.7, 84.3, 55.8, 35.6 (t,  $J = 19.8$  Hz), 24.2, 24.0.

$^{11}\text{B}$  NMR (128 MHz, Chloroform-*d*)  $\delta$  31.0.

HRMS (ESI) calcd for  $\text{C}_{16}\text{H}_{23}\text{BF}_2\text{IO}_5\text{S}$  ( $\text{M}+\text{H}^+$ ): 503.0367, found: 503.0367.

**2-(3,3-difluoro-1-iodo-3-((3-methoxyphenyl)sulfonyl)propyl)-4,4,5,5-tetramethyl-1,3,2-dioxaborolane (3t)**

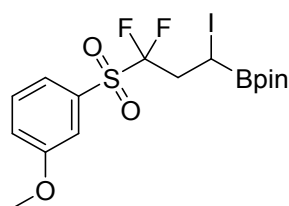

White solid, mp: 84-85 °C, Flash column chromatography conditions: *n*-pentane: ethyl acetate = 30:1; Yield: 122.2 mg (81%);

$^1\text{H}$  NMR (500 MHz, Chloroform-*d*)  $\delta$  7.58 – 7.49 (m, 2H), 7.43 (t,  $J = 2.1$  Hz, 1H), 7.28 (ddd,  $J = 8.2, 2.7, 1.2$  Hz, 1H), 3.88 (s, 3H), 3.42 (dd,  $J = 10.9, 5.0$  Hz, 1H), 3.22 – 3.07 (m, 1H), 2.99 – 2.84 (m, 1H), 1.25 (d,  $J = 6.3$  Hz, 12H).

$^{19}\text{F}$  NMR (376 MHz, Chloroform-*d*)  $\delta$  -103.39 (d,  $J = 229.36$  Hz), -104.04 (d,  $J = 229.36$  Hz).

$^{13}\text{C}$  NMR (126 MHz, Chloroform-*d*)  $\delta$  160.0, 133.1, 130.4, 123.4 (t,  $J = 288.4$  Hz), 123.1, 122.3, 114.8, 84.4, 55.8, 35.6 (t,  $J = 19.7$  Hz), 24.2, 24.0.

$^{11}\text{B}$  NMR (128 MHz, Chloroform-*d*)  $\delta$  31.8.

HRMS (ESI) calcd for  $\text{C}_{16}\text{H}_{23}\text{BF}_2\text{IO}_5\text{S}$  ( $\text{M}+\text{H}^+$ ): 503.0367, found: 503.0367.

**2-(3-((3,4-dimethoxyphenyl)sulfonyl)-3,3-difluoro-1-iodopropyl)-4,4,5,5-tetramethyl-1,3,2-dioxaborolane (3u)**

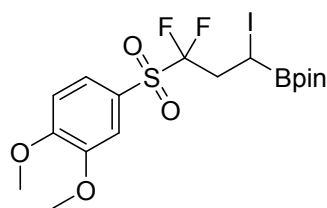

White solid, mp: 142-144 °C, Flash column chromatography conditions: *n*-pentane:

ethyl acetate = 30:1; Yield: 110.1 mg (69%);

$^1\text{H}$  NMR (500 MHz, Chloroform-*d*)  $\delta$  7.59 (dd,  $J = 8.4, 2.2$  Hz, 1H), 7.34 (s, 1H), 7.02 (d,  $J = 8.5$  Hz, 1H), 3.98 (s, 3H), 3.93 (s, 3H), 3.41 (dd,  $J = 11.0, 5.0$  Hz, 1H), 3.21 – 3.05 (m, 1H), 2.97 – 2.82 (m, 1H), 1.24 (d,  $J = 6.5$  Hz, 12H).

$^{19}\text{F}$  NMR (376 MHz, Chloroform-*d*)  $\delta$  -103.61 (d,  $J = 229.36$  Hz), -104.19 (d,  $J = 229.36$  Hz).

$^{13}\text{C}$  NMR (126 MHz, Chloroform-*d*)  $\delta$  155.1, 149.3, 125.6, 123.4 (t,  $J = 287.3$  Hz), 122.9, 112.3, 110.9, 84.4, 56.3, 35.7 (t,  $J = 19.9$  Hz), 24.2, 24.0.

$^{11}\text{B}$  NMR (128 MHz, Chloroform-*d*)  $\delta$  32.0.

HRMS (ESI) calcd for  $\text{C}_{17}\text{H}_{25}\text{BF}_2\text{IO}_6\text{S}$  ( $\text{M}+\text{H}^+$ ): 533.0472, found: 533.0472.

**Ethyl 2,2-difluoro-4-iodo-4-(4,4,5,5-tetramethyl-1,3,2-dioxaborolan-2-yl)butanoate (3v)**

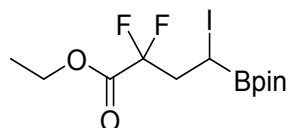

Colourless liquid, Flash column chromatography conditions: *n*-pentane: ethyl acetate = 20:1; Yield: 89.7 mg (74%);

$^1\text{H}$  NMR (600 MHz, Chloroform-*d*)  $\delta$  4.32 (q,  $J = 7.2, 6.7$  Hz, 1H), 3.33 (dd,  $J = 11.2, 5.0$  Hz, 1H), 2.89 – 2.77 (m, 1H), 2.74 – 2.62 (m, 1H), 1.35 (t,  $J = 7.1$  Hz, 1H), 1.26 (d,  $J = 5.3$  Hz, 12H).

$^{19}\text{F}$  NMR (376 MHz, Chloroform-*d*)  $\delta$  -105.17 (d,  $J = 262.3$  Hz), -107.11 (d,  $J = 262.3$  Hz).

$^{13}\text{C}$  NMR (101 MHz, Chloroform-*d*)  $\delta$  163.3 (t,  $J = 32.4$  Hz), 115.2 (t,  $J = 252.3$  Hz), 84.3, 63.0, 40.5 (t,  $J = 23.3$  Hz), 24.1, 24.1, 13.8.

$^{11}\text{B}$  NMR (128 MHz, Chloroform-*d*)  $\delta$  31.3.

HRMS (ESI) calcd for  $\text{C}_{12}\text{H}_{21}\text{BF}_2\text{IO}_4$  ( $\text{M}+\text{H}^+$ ): 405.0540, found: 405.0540.

**2-(1-bromo-3,3,3-trichloropropyl)-4,4,5,5-tetramethyl-1,3,2-dioxaborolane (3w)**

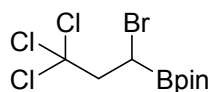

Colourless liquid, Flash column chromatography conditions: *n*-pentane: ethyl acetate =

80:1; Yield: 94.0 mg (89%);

$^1\text{H}$  NMR (500 MHz, Chloroform-*d*)  $\delta$  7.29 – 7.11 (m, 2H), 6.87 (dd,  $J = 14.2, 2.8$  Hz, 1H), 4.92 (s, 12H).

$^{13}\text{C}$  NMR (126 MHz, Chloroform-*d*)  $\delta$  97.8, 84.6, 58.4, 24.3, 24.3.

$^{11}\text{B}$  NMR (128 MHz, Chloroform-*d*)  $\delta$  30.4.

HRMS (EI) calcd for  $\text{C}_9\text{H}_{15}\text{BBrCl}_3\text{O}_2$ : 349.9414, found: 349.9411.

**ethyl 2,2-difluoro-4-iodo-4-(4,4,5,5-tetramethyl-1,3,2-dioxaborolan-2-yl)pentanoate (3x)**

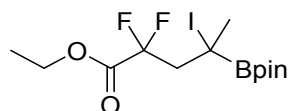

Colourless liquid, Flash column chromatography conditions: *n*-pentane: ethyl acetate = 20:1; Yield: 76.0 mg (61%);

$^1\text{H}$  NMR (600 MHz, Chloroform-*d*)  $\delta$  4.31 (q,  $J = 7.2$  Hz, 2H), 3.21 – 3.09 (m, 1H), 2.95 – 2.83 (m, 1H), 1.35 (t,  $J = 7.2$  Hz, 3H), 1.27 (d,  $J = 5.8$  Hz, 12H).

$^{19}\text{F}$  NMR (565 MHz, Chloroform-*d*)  $\delta$  -101.28 (d,  $J = 264.8$  Hz), -104.78 (d,  $J = 264.8$  Hz).

$^{13}\text{C}$  NMR (151 MHz, Chloroform-*d*)  $\delta$  163.5 (t,  $J = 32.5$  Hz),  $\delta$  115.4 (t,  $J = 348.8$  Hz), 84.4, 63.0, 47.8 (t,  $J = 22.0$  Hz), 29.4, 24.1, 24.1, 13.9.

$^{11}\text{B}$  NMR (128 MHz, Chloroform-*d*)  $\delta$  32.1.

HRMS (ESI) calcd for  $\text{C}_{13}\text{H}_{23}\text{BF}_2\text{IO}_4$  ( $\text{M}+\text{H}^+$ ): 419.0697, found: 419.0696.

#### 4. Synthetic applicability

##### Gram scale study

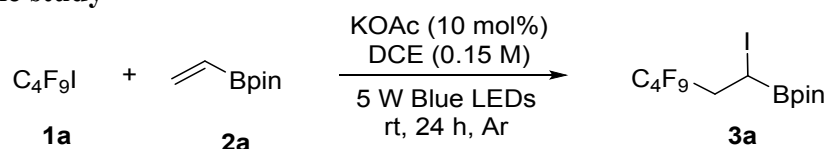

In air, a 200 mL schlenk tube was charged with KOAc (1 mmol, 99 mg, 10 mol%). The tube was evacuated and filled with Argon for three cycles. Then, 1,1-Dichloroethane (65 mL), Vinyl borate pinacol ester (**2a**) (10 mmol, 1.7 mL, 1.0 equiv), Perfluoroiodobutane (**2a**) (3.44 mL, 2.0 equiv) were added to the tube at room temperature. The reaction was allowed to stir under 5 W Blue LEDs irradiation at room

temperature. After 24 hours, the crude reaction mixture was concentrated in vacuo and purified by column chromatography (*n*-pentane: ethyl acetate = 30:1) to afford the desired product **3a** as a yellow liquid in 73% yield (3.69 g).

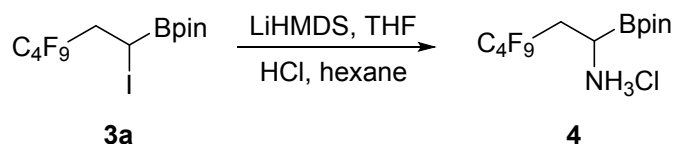

The amine hydrochloride **4** is prepared according to the reference<sup>4</sup>.

$\alpha$ -haloboronates **3a** (500 mg, 1 mmol, 1 equiv) was dissolved in anhydrous THF (1.3 mL) and was added dropwise to a cool (-78 °C) solution consisting of lithium bis(trimethylsilyl)amide (1.2 mL, 1.2 mmol, 1.0 M in THF) and THF (1.3 mL). The reaction mixture was allowed to warm to room temperature and stirred for 12 h. It was concentrated in vacuo, and hexane was added. The reaction mixture was cooled to -78 °C, and 4 N anhydrous hydrogen chloride in dioxane (0.75 mL, 3 mmol, 3 equiv) was added dropwise. The mixture was warmed to room temperature and stirred for 5 h. Solvent was removed by evaporation, and chloroform was added. Insoluble material was removed by filtration. The filtrate was evaporated almost to dryness, and hexanes were added. The desired product crystallized. It was isolated and washed with cold *n*-pentane to yield 250mg (59 %) of **4** as the amine hydrochloride.

**3,3,4,4,5,5,6,6,6-nonafluoro-1-(4,4,5,5-tetramethyl-1,3,2-dioxaborolan-2-yl)hexan-1-amino hydrochloride (4)**

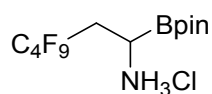

Off-white solid, mp: 184-185 °C

<sup>1</sup>H NMR (500 MHz, Chloroform-*d*)  $\delta$  7.84 (s, 3H), 3.59 (q, *J* = 5.8 Hz, 1H), 3.14 – 2.99 (m, 1H), 2.93 – 2.77 (m, 1H), 1.31 (s, 12H).

<sup>19</sup>F NMR (471 MHz, Chloroform-*d*)  $\delta$  -80.95 (t, *J* = 9.7 Hz), -110.16 – -111.64 (m), -124.25 – -124.46 (m), -125.75 – -125.89 (m).

<sup>13</sup>C NMR (101 MHz, Chloroform-*d*)  $\delta$  86.5, 30.16 (t, *J* = 21.3 Hz), 24.9, 24.7.

<sup>11</sup>B NMR (128 MHz, Chloroform-*d*)  $\delta$  32.8.

HRMS (ESI) calcd for  $C_{12}H_{18}BF_9NO_2$  ( $M+H^+$ ): 390.1281, found: 390.1279.

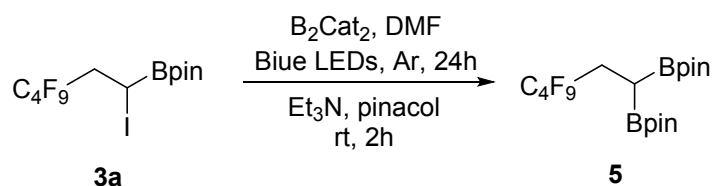

The *gem*-diboronate **5** is prepared according to the reference<sup>5</sup>.

In air, a 25 mL schlenk tube was charged with bis(catecholato)diboron (190 mg, 0.800 mmol, 4 equiv). The tube was evacuated and filled with argon for three cycles. Then, Dimethylformamide (0.6 mL) and  $\alpha$ -haloboronates **3a** (100 mg, 0.2 mmol, 1.0 equiv) was added. The reaction mixture was stirred under 5 W Blue LED irradiation at room temperature for 24 hours. A solution of pinacol (95 mg, 0.80 mmol, 4.0 equiv) in triethylamine (0.7 mL) was added to the mixture. After 2-hour, water (15 mL) was added and the aqueous layer was extracted with ethyl acetate (3 x 15 mL). The combined organic layers were dried over magnesium sulfate, filtered and concentrated. The product was purified by flash column chromatography (*n*-pentane: ethyl acetate = 20:1) to afford the desired product **5** as a colorless oil in 61% yield (61.2 mg).

**2,2'-(3,3,4,4,5,5,6,6,6-nonafluorohexane-1,1-diyl)bis(4,4,5,5-tetramethyl-1,3,2-dioxaborolane) (5)**

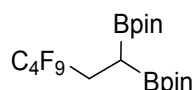

Known compound<sup>6</sup>.

$^1\text{H}$  NMR (500 MHz, Chloroform-*d*)  $\delta$  2.42 – 2.29 (m, 2H), 1.22 (d,  $J$  = 6.1 Hz, 24H), 1.05 (t,  $J$  = 7.3 Hz, 1H).

$^{19}\text{F}$  NMR (471 MHz, Chloroform-*d*)  $\delta$  -80.98 (t,  $J$  = 9.9 Hz), -114.84 – -115.03 (m), -124.40 – -124.54 (m), -125.85 – -125.99 (m).

$^{13}\text{C}$  NMR (126 MHz, Chloroform-*d*)  $\delta$  83.7, 27.3 (t,  $J$  = 22.3 Hz), 24.8, 24.5.

$^{11}\text{B}$  NMR (128 MHz, Chloroform-*d*)  $\delta$  33.1.

HRMS (ESI) calcd for  $C_{18}H_{28}B_2F_9O_4$  ( $M+H^+$ ): 501.2025, found: 501.2021.

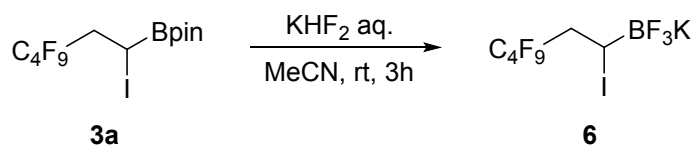

The potassium  $\alpha$ -iododetrifluoroborate **6** is prepared according to the reference<sup>7</sup>.  $\alpha$ -haloboronates **3a** (400 mg, 0.8 mmol) was dissolved in acetonitrile (5 mL) and saturated aqueous potassium hydrogenfluoride solution (0.90 mL, 4.1 mmol, 4.5 M) was added. The reaction mixture was stirred at room temperature for 3 hours, concentrated, azeotroped with methanol and placed on the vacuum overnight. The crude product was dissolved in acetone, filtered and concentrated. The resulting crude product was washed with n-pentane several times to give the desired product **6** (375 mg, 98% yield) as a white solid.

**potassium trifluoro(3,3,4,4,5,5,6,6,6-nonafluoro-1-iodohexyl)borate (6)**

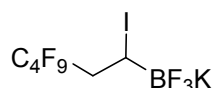

<sup>1</sup>H NMR (500 MHz, Acetonitrile-*d*<sub>3</sub>)  $\delta$  2.92 (s, 1H), 2.81 – 2.63 (m, 5H), 2.50 – 2.30 (m, 1H).

<sup>19</sup>F NMR (471 MHz, Acetonitrile-*d*<sub>3</sub>)  $\delta$  -81.82 (t, *J* = 10.4 Hz), -114.03 – -117.09 (m), -125.15. – -125.47 (m). -125.64 – -127.20 (m), -149.46 – -149.99 (m).

<sup>13</sup>C NMR (126 MHz, Acetonitrile-*d*<sub>3</sub>)  $\delta$  36.7 (t, *J* = 21.1 Hz).

<sup>11</sup>B NMR (128 MHz, Acetonitrile-*d*<sub>3</sub>)  $\delta$  3.0.

HRMS (ESI) calcd for C<sub>6</sub>H<sub>3</sub>BF<sub>12</sub>I (M-K<sup>+</sup>): 440.9186, found: 440.9184.

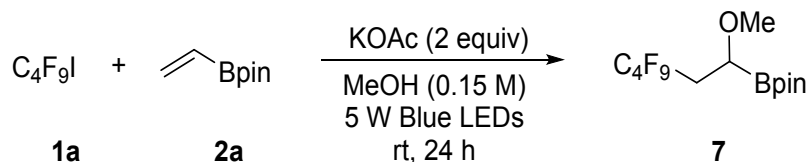

In air, a 25 mL Schlenk tube was charged with KOAc (0.6 mmol, 59 mg, 2.0 equiv). The tube was evacuated and filled with Argon for three cycles. Then, methanol (2 mL), Vinyl borate pinacol ester (**2a**) (0.3 mmol, 105  $\mu$ L, 1.0 equiv), Perfluoroiodobutane (**1a**) (105  $\mu$ L, 0.6 mmol, 2.0 equiv) were added to the tube at room temperature. The reaction was allowed to stir under Blue LEDs irradiation at room temperature. After 24 hours, the crude reaction mixture was concentrated in vacuo and purified by column

chromatography (*n*-pentane: ethyl acetate = 20:1) to afford the desired product **7** as a colorless oil in 79% yield (95.6 mg).

**4,4,5,5-tetramethyl-2-(3,3,4,4,5,5,6,6,6-nonafluoro-1-methoxyhexyl)-1,3,2-dioxaborolane (7)**

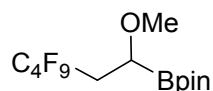

<sup>1</sup>H NMR (500 MHz, Chloroform-*d*) δ 3.45 (t, *J* = 5.9 Hz, 1H), 3.38 (s, 3H), 2.60 – 2.31 (m, 2H), 1.28 (s, 12H).

<sup>19</sup>F NMR (471 MHz, Chloroform-*d*) δ -80.95 (t, *J* = 10.1 Hz), -111.32 – -113.57 (m), -124.49 – -124.67 (m), -125.75 – -125.93 (m).

<sup>13</sup>C NMR (126 MHz, Chloroform-*d*) δ 84.5, 58.3, 31.5 (t, *J* = 21.5 Hz), 24.7, 24.6.

<sup>11</sup>B NMR (128 MHz, Chloroform-*d*) δ 32.1.

HRMS (ESI) calcd for C<sub>13</sub>H<sub>19</sub>BF<sub>9</sub>O<sub>3</sub> (M+H<sup>+</sup>): 405.1278, found: 405.1278.

**S<sub>N</sub>2 reaction of α-haloboronates:**

**Method A**

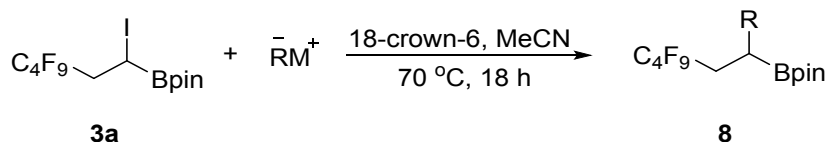

In air, a 25 mL schlenk tube was charged with potassium benzoate (0.4 mmol, 2.0 equiv), 18-crown-6 (0.2 mmol, 1.0 equiv). The tube was evacuated and filled with Argon for three cycles. Then, MeCN (2 mL), α-haloboronate **3a** was added to the tube at room temperature. The reaction mixture was vigorously stirred at 70 °C until the reaction was complete as monitored by TLC analysis (18 h). the crude reaction mixture was concentrated in vacuo and purified by column chromatography to afford the desired product.

**Method B**

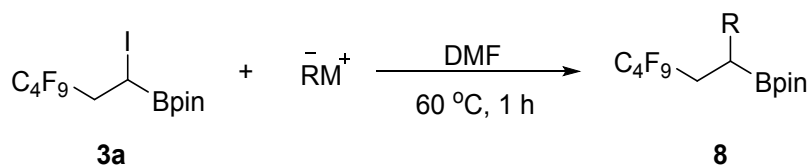

In air, a 25 mL schlenk tube was charged with sodiumthiophenate (0.24 mmol, 1.2

equiv), The tube was evacuated and filled with Argon for three cycles. Then, DMF (2 mL),  $\alpha$ -haloboronate **3a** was added to the tube at room temperature. The reaction mixture was vigorously stirred at 60 °C until the reaction was complete as monitored by TLC analysis (1 h). The reaction mixture was quenched with water and extracted with EtOAc. The combined organic layers were concentrated in vacuo and purified by column chromatography to afford the desired product.

**4,4,5,5-tetramethyl-2-(3,3,4,4,5,5,6,6,6-nonafluoro-1-(phenylthio)hexyl)-1,3,2-dioxaborolane (8a)**

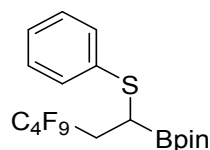

This compound was synthesized according to the Method B, Yellow liquid, Flash column chromatography conditions: *n*-pentane: ethyl acetate = 50:1; Yield: 63.5 mg (66%);

<sup>1</sup>H NMR (500 MHz, Chloroform-*d*)  $\delta$  7.43 – 7.38 (m, 6H), 7.33 – 7.28 (m, 6H), 7.26 – 7.22 (m, 3H), 3.01 (dd, *J* = 11.5, 3.3 Hz, 3H), 2.73 – 2.57 (m, 1H), 2.46 – 2.32 (m, 1H), 1.23 (d, *J* = 10.4 Hz, 38H).

<sup>13</sup>C NMR (126 MHz, Chloroform-*d*)  $\delta$  134.4, 130.6, 129.1, 127.1, 84.5, 33.3 (t, *J* = 21.4 Hz), 24.5, 24.4.

<sup>19</sup>F NMR (471 MHz, Chloroform-*d*)  $\delta$  -80.95 (t, *J* = 10.8 Hz), -111.73 – -114.16 (m), -124.33 – -124.50 (m), -125.83 – -125.99 (m).

<sup>11</sup>B NMR (128 MHz, Chloroform-*d*)  $\delta$  32.1.

HRMS (ESI) calcd for C<sub>18</sub>H<sub>21</sub>BF<sub>9</sub>O<sub>2</sub>S (M+H<sup>+</sup>): 483.1206, found: 483.1201.

**3,3,4,4,5,5,6,6,6-nonafluoro-1-(4,4,5,5-tetramethyl-1,3,2-dioxaborolan-2-yl)hexyl acrylate (8b)**

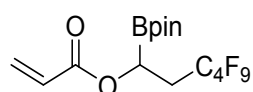

This compound was synthesized according to the Method A, Colourless liquid, Flash column chromatography conditions: *n*-pentane: ethyl acetate = 50:1; Yield: 71.6 mg (81%);



$^1\text{H}$  NMR (400 MHz, Chloroform-*d*)  $\delta$  6.48 (d,  $J = 17.3$  Hz, 1H), 6.15 (ddd,  $J = 17.4$ , 10.5, 1.8 Hz, 1H), 5.93 (d,  $J = 10.4$  Hz, 1H), 4.38 (dt,  $J = 9.7$ , 2.6 Hz, 1H), 2.69 – 2.36 (m, 2H), 1.26 (s, 12H).

$^{19}\text{F}$  NMR (376 MHz, Chloroform-*d*)  $\delta$  -81.03 (t,  $J = 9.8$  Hz), -111.68 – -115.03 (m), -124.33 – -124.60 (m), -125.85 – -126.07 (m).

$^{13}\text{C}$  NMR (126 MHz, Chloroform-*d*)  $\delta$  168.3, 132.8, 126.7, 84.1, 31.5 (t,  $J = 21.3$  Hz), 24.7, 24.6.

$^{11}\text{B}$  NMR (128 MHz, Chloroform-*d*)  $\delta$  28.9.

HRMS (ESI) calcd for  $\text{C}_{15}\text{H}_{19}\text{BF}_9\text{O}_4$  ( $\text{M}+\text{H}^+$ ): 445.1227, found: 445.1222.

**3,3,4,4,5,5,6,6,6-nonafluoro-1-(4,4,5,5-tetramethyl-1,3,2-dioxaborolan-2-yl)hexyl 2-chloro-6-((4,6-dimethoxypyrimidin-2-yl)thio)benzoate (8c)**

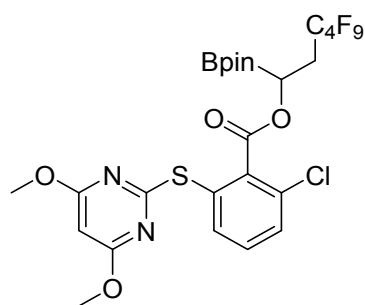

This compound was synthesized according to the Method A, Yellow liquid, Flash column chromatography conditions: *n*-pentane: ethyl acetate = 50:1; Yield: 66.2 mg (49%);

$^1\text{H}$  NMR (500 MHz, Chloroform-*d*)  $\delta$  7.60 (dd,  $J = 7.7$ , 1.1 Hz, 1H), 7.46 (dd,  $J = 8.2$ , 1.1 Hz, 1H), 7.38 (t,  $J = 7.9$  Hz, 1H), 5.69 (s, 1H), 4.57 (dd,  $J = 8.0$ , 4.7 Hz, 1H), 3.69 (s, 6H), 2.66 – 2.44 (m, 2H), 1.25 (d,  $J = 5.1$  Hz, 12H).

$^{19}\text{F}$  NMR (471 MHz, Chloroform-*d*)  $\delta$  -80.96 (t,  $J = 9.7$  Hz), -112.48 – -114.39 (m), -124.34 – -124.49 (m), -125.85 – -125.99 (m),

$^{13}\text{C}$  NMR (126 MHz, Chloroform-*d*)  $\delta$  170.8, 169.2, 166.5, 138.1, 136.1, 131.4, 130.4, 130.2, 129.3, 86.4, 84.6, 53.9, 31.5 (t,  $J = 21.7$  Hz), 24.6.

$^{11}\text{B}$  NMR (128 MHz, Chloroform-*d*)  $\delta$  33.4.

HRMS (ESI) calcd for  $\text{C}_{25}\text{H}_{26}\text{BClF}_9\text{N}_2\text{O}_6\text{S}$  ( $\text{M}+\text{H}^+$ ): 699.1144, found: 699.1140.

## 5. Mechanism studies

### 5.1. Radical inhibition experiment with TEMPO

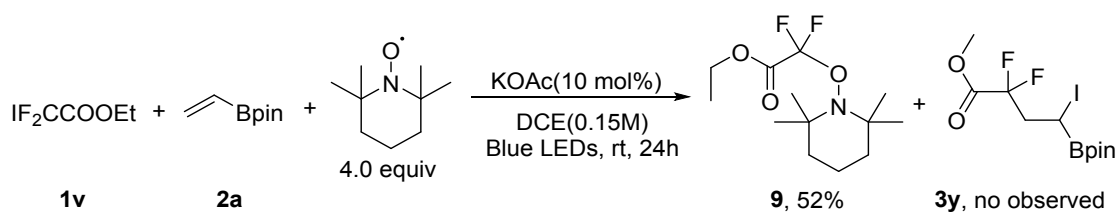

In air, a 25 mL schlenk tube was charged with KOAc (3 mg, 0.03 mmol, 10 mol%) and TEMPO (188 mg, 1.2 mmol, 4.0 equiv). The tube was evacuated and filled with Argon for three cycles. Then, 1,1-Dichloroethane (2 mL), Vinyl borate pinacol ester (**2a**) (52  $\mu\text{L}$ , 0.3 mmol, 1.0 equiv), Ethyl iododifluoroacetate (**1v**) (88  $\mu\text{L}$ , 0.6 mmol, 2.0 equiv) were added to the tube at room temperature. The reaction was allowed to stir under Blue LEDs irradiation at room temperature. After 24 hours, the crude reaction mixture was concentrated in vacuo and purified by column chromatography (*n*-pentane: ethyl acetate = 30:1) to afford the TEMPO-CF<sub>2</sub>COOEt Adduct **9** (44 mg, 52% yield). as colorless liquid.

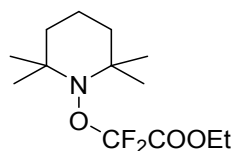

known compound<sup>8</sup>.

<sup>1</sup>H NMR (400 MHz, Chloroform-*d*)  $\delta$  4.35 (q,  $J = 7.1$  Hz, 2H), 1.64 – 1.50 (m, 5H), 1.37 (t,  $J = 7.2$  Hz, 4H), 1.21 – 1.13 (m, 12H).

<sup>19</sup>F NMR (376 MHz, Chloroform-*d*)  $\delta$  -73.45.

<sup>13</sup>C NMR (101 MHz, Chloroform-*d*)  $\delta$  160.7 (t,  $J = 42.6$  Hz), 115.5 (t,  $J = 271.5$  Hz), 63.0, 61.4, 40.2, 33.4 (t,  $J = 4.4$  Hz), 20.7, 16.9, 13.9.

## 5.2. Radical clock experiments

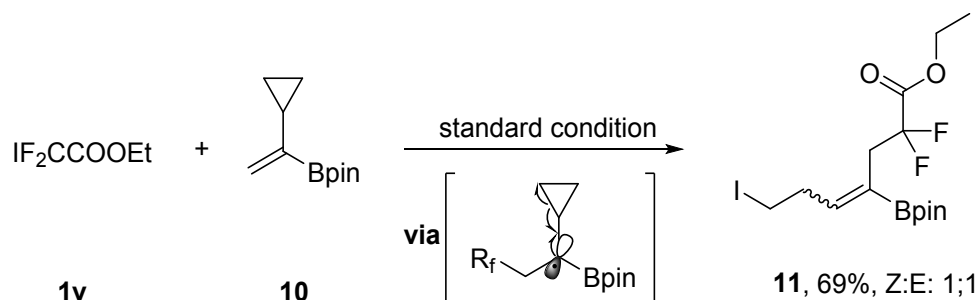

In air, a 25 mL schlenk tube was charged with KOAc (3 mg, 0.03 mmol, 10 mol%). The tube was evacuated and filled with Argon for three cycles. Then, 1,1-Dichloroethane (2 mL), Alkenyl borate **10** (0.3 mmol, 1.0 equiv), Ethyl iododifluoroacetate (**1v**) (88  $\mu$ L, 0.6 mmol, 2.0 equiv) were added to the tube at room temperature. The reaction was allowed to stir under 5 W Blue LEDs irradiation at room temperature. After 24 hours, the crude reaction mixture was concentrated in vacuo and purified by column chromatography (*n*-pentane: ethyl acetate = 30:1) to afford the open ring product **11** (92 mg, 69% yield) as colorless liquid, no unopened products are detected.

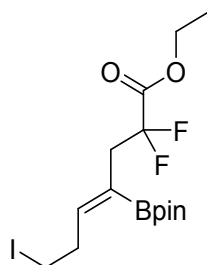

$^1\text{H}$  NMR (500 MHz, Chloroform-*d*)  $\delta$  6.45 (t,  $J = 7.1$  Hz, 1H), 4.29 (q,  $J = 7.1$  Hz, 2H), 3.15 (t,  $J = 7.3$  Hz, 2H), 2.94 (t,  $J = 17.3$  Hz, 2H), 2.79 (q,  $J = 7.3$  Hz, 2H), 1.35 (t,  $J = 7.2$  Hz, 3H), 1.24 (s, 12H).

$^{19}\text{F}$  NMR (471 MHz, Chloroform-*d*)  $\delta$  -104.28.

$^{13}\text{C}$  NMR (126 MHz, Chloroform-*d*)  $\delta$  164.1 (t,  $J = 32.8$  Hz), 149.3, 115.3 (t,  $J = 251.4$  Hz), 83.8, 62.7, 33.4 (t,  $J = 23.8$  Hz), 33.4, 24.6, 13.9, 2.7.

$^{11}\text{B}$  NMR (128 MHz, Chloroform-*d*)  $\delta$  29.7.

HRMS (ESI) calcd for  $\text{C}_{15}\text{H}_{25}\text{BF}_2\text{IO}_4$  ( $\text{M}+\text{H}^+$ ): 445.0853, found: 445.0852.

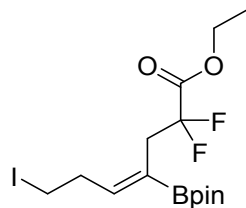

$^1\text{H}$  NMR (500 MHz, Chloroform- $d$ )  $\delta$  6.15 (t,  $J$  = 7.4 Hz, 1H), 4.28 (q,  $J$  = 7.1 Hz, 2H), 3.14 (t,  $J$  = 7.1 Hz, 2H), 3.00 – 2.81 (m, 4H), 1.33 (t,  $J$  = 7.1 Hz, 3H), 1.25 (s, 12H).

$^{13}\text{C}$  NMR (126 MHz, Chloroform- $d$ )  $\delta$  164.1 (t,  $J$  = 32.9 Hz), 150.8, 115.6 (t,  $J$  = 251.3 Hz), 83.6, 62.6, 40.6 (t,  $J$  = 23.0 Hz), 34.7, 24.7, 14.0, 5.27.

$^{19}\text{F}$  NMR (471 MHz, Chloroform- $d$ )  $\delta$  -104.54.

$^{11}\text{B}$  NMR (128 MHz, Chloroform- $d$ )  $\delta$  29.69.

HRMS (ESI) calcd for  $\text{C}_{15}\text{H}_{25}\text{BF}_2\text{IO}_4$  ( $\text{M}+\text{H}^+$ ): 445.0853, found: 445.0852.

### 5.3. UV-vis spectroscopic measurement

UV/vis absorption spectra were recorded in 1 cm path quartz cuvettes using Hitachi UH4150 UV/Vis spectrometer, pure DCE as blank sample.

Solution 1: Vinyl borate pinacol ester (53  $\mu\text{L}$ , 0.3 mmol) was dissolved in DCE (2.0 mL).

Solution 2: Vinyl borate pinacol ester (53  $\mu\text{L}$ , 0.3 mmol) and KOAc (3 mg, 0.03 mmol) was dissolved in DCE (2.0 mL). The mixtures were stirred for two minutes, filtered before use.

Solution 3: Vinyl borate pinacol ester (53  $\mu\text{L}$ , 0.3 mmol) and perfluoriodobutane (0.6 mmol, 105  $\mu\text{L}$ , 2.0 equiv) was dissolved in DCE (2.0 mL). The mixtures were stirred for two minutes, filtered before use.

Solution 4: Vinyl borate pinacol ester (53  $\mu\text{L}$ , 0.3 mmol), perfluoriodobutane (0.6 mmol, 105  $\mu\text{L}$ , 2.0 equiv) and KOAc (3 mg, 0.03 mmol) was dissolved in DCE (2.0 mL). The mixtures were stirred for two minutes, filtered before use.

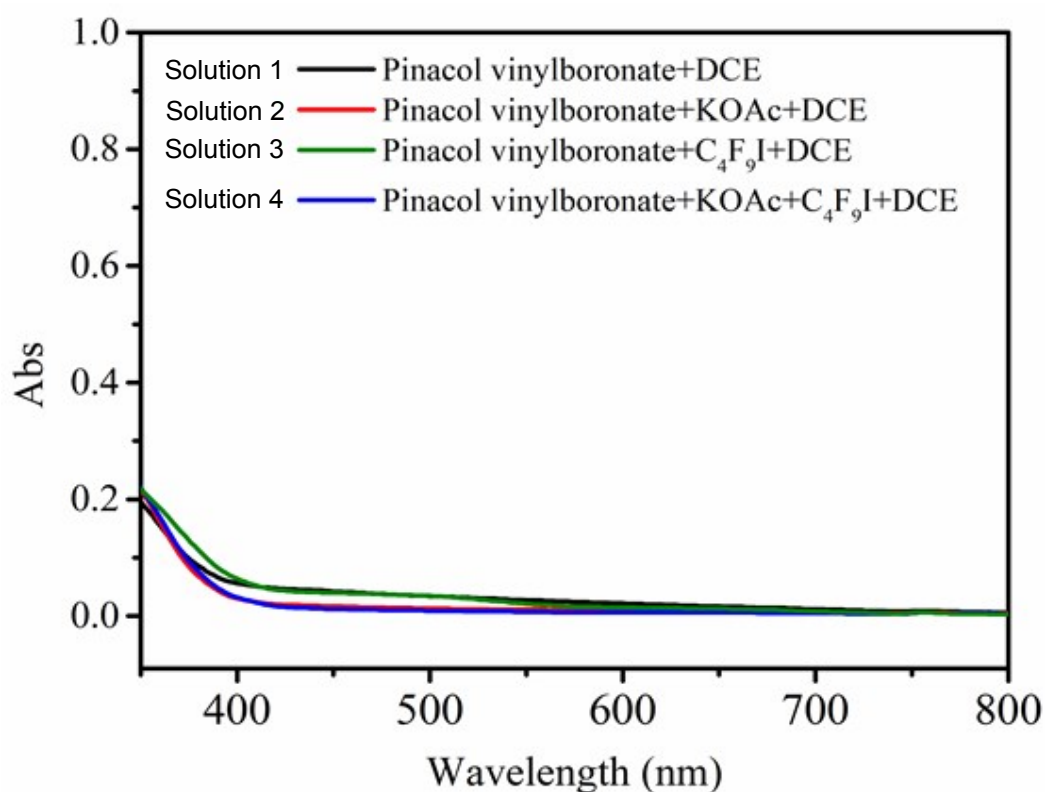

## 5.4. Comparative Experiment

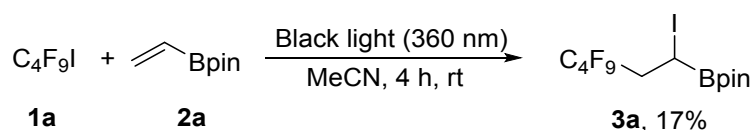

In air, a 25 mL schlenk tube was evacuated and filled with argon for three cycles. Then, MeCN (0.5 mL), vinyl borate pinacol ester (**2a**) (0.5 mmol, 86  $\mu$ L, 1.0 equiv), perfluoroiodobutane (**1a**) (0.75 mmol, 129  $\mu$ L, 1.5 equiv) were added to the tube at room temperature. The reaction was allowed to stir under Black light (360 nm) irradiation at room temperature. After 4 hours, the yield is 17% after GC detection (dodecane as internal standard).

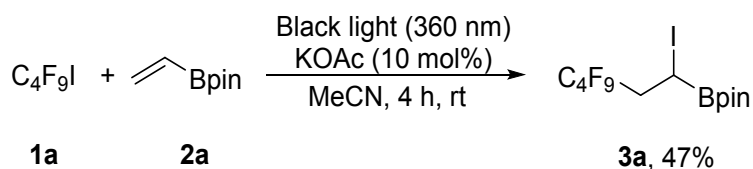

In air, a 25 mL schlenk tube was charged with KOAc (0.05 mmol, 5 mg, 10 mol%). The tube was evacuated and filled with Argon for three cycles. Then, MeCN (2 mL), vinyl borate pinacol ester (**2a**) (0.5 mmol, 86  $\mu$ L, 1.0 equiv) and perfluoroiodobutane (**1a**) (0.75 mmol, 129  $\mu$ L, 1.5 equiv) were added to the tube at room temperature. The reaction was allowed to stir under Black light (360 nm) irradiation at room temperature. After 4 hours, the yield is 47% after GC detection (dodecane as internal standard).

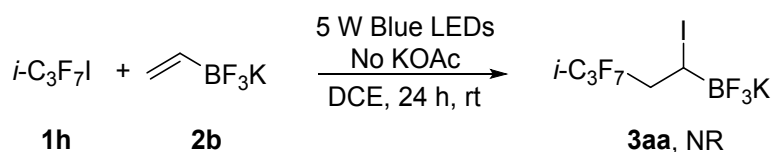

In air, a 25 mL schlenk tube was charged with Potassium vinyl trifluoroborate (**2b**) (0.03 mmol, 40 mg, 1.0 equiv). The tube was evacuated and filled with argon for three cycles. Then, DCE (2 mL) and *i*-C<sub>3</sub>F<sub>7</sub>I (**1h**) (0.6 mmol, 81  $\mu$ L, 2.0 equiv) were added to the tube at room temperature. The reaction was allowed to stir under 5 W Blue LEDs

irradiation at room temperature. After 24 hours, trifluoromethoxybenzene (0.3 mmol, 40  $\mu$ L, 1.0 equiv) was added as an internal standard, and the NMR spectrum was measured, but the target product was not obtained.

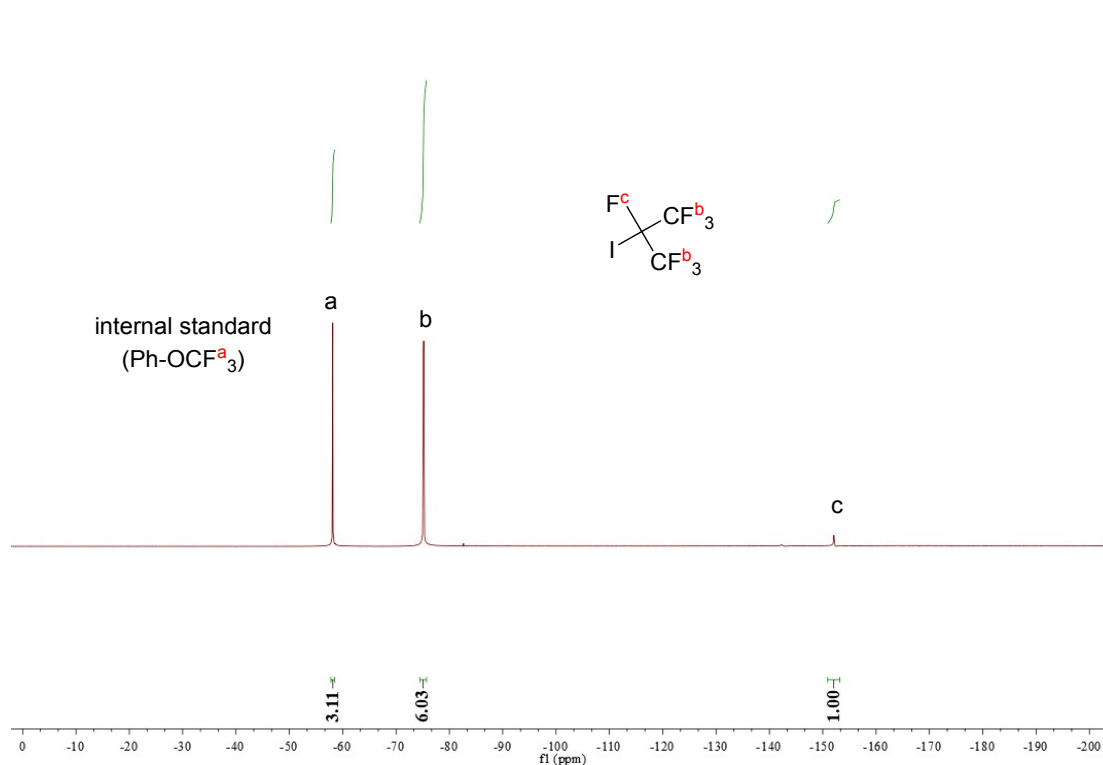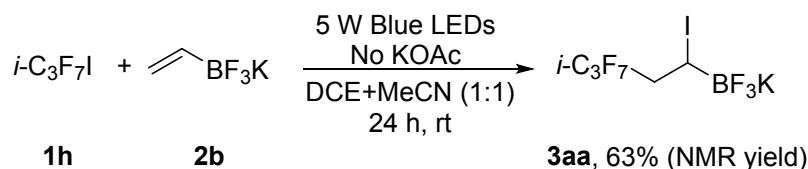

In air, a 25 mL schlenk tube was charged with potassium vinyl trifluoroborate (**2b**) (0.03 mmol, 40 mg, 1.0 equiv). The tube was evacuated and filled with argon for three cycles. Then, DCE (1 mL), MeCN (1 ml) and *i*-C<sub>3</sub>F<sub>7</sub>I (**1h**) (0.6 mmol, 81  $\mu$ L, 2.0 equiv) were added to the tube at room temperature. The reaction was allowed to stir under 5 W Blue LEDs irradiation at room temperature. After 24 hours, trifluoromethoxybenzene (0.3 mmol, 40  $\mu$ L, 1.0 equiv) was added as an internal standard, and the NMR spectrum yield is 63%.

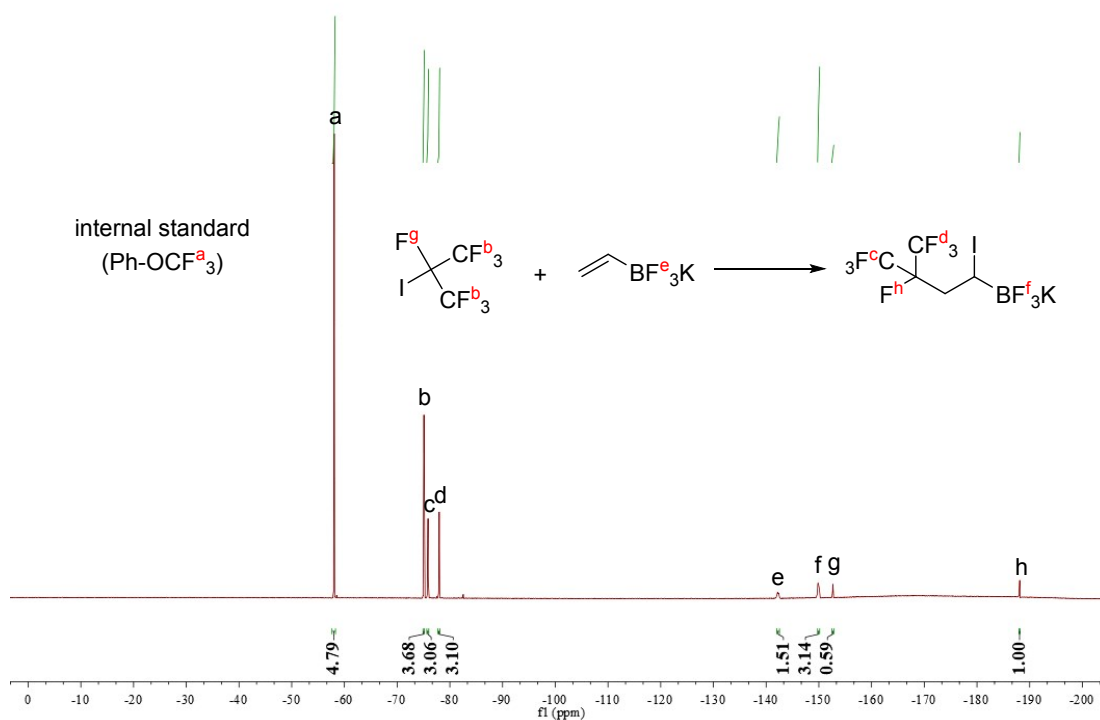

## 5.5. Comparison with or without KOAc

Yields were determined by GC using dodecane as internal standard.

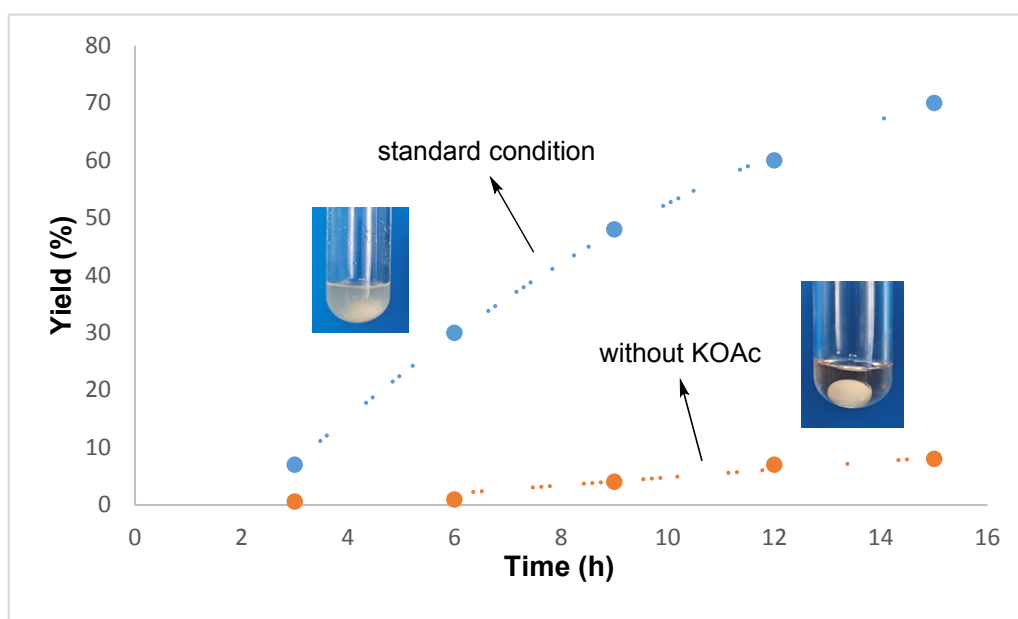



## 5.6. Catalyst cycle experiment

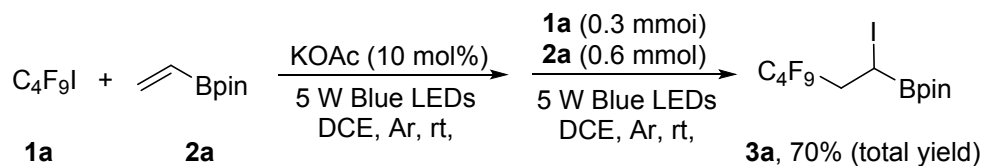

In air, a 25 mL schlenk tube was charged with KOAc (0.03 mmol, 3 mg, 10 mol%). The tube was evacuated and filled with Argon for three cycles. Then, DCE (2 mL), vinyl borate pinacol ester (**2a**) (0.3 mmol, 52  $\mu\text{L}$ , 1.0 equiv) and perfluoroiodobutane (**1a**) (105  $\mu\text{L}$ , 2.0 equiv) were added to the tube at room temperature. The reaction was allowed to stir under 5 W Blue LEDs irradiation at room temperature. After 24 hours, under argon atmosphere, add the same proportions of vinyl borate pinacol ester (**2a**) (0.3 mmol, 52  $\mu\text{L}$ , 1.0 equiv), perfluoroiodobutane (**1a**) (105  $\mu\text{L}$ , 2.0 equiv) and DCE (2 ml). After continuing the reaction for 24 hours, the total yield is 70% after GC detection.

## 6. Unsuccessful examples

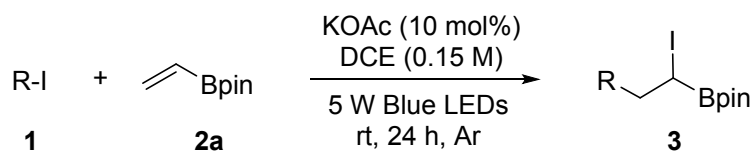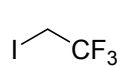

**1z**, N.D.

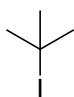

**1aa**, N.D.

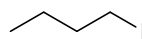

**1ab**, N.D.

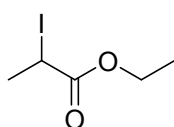

**1ac**, N.D.

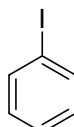

**1ad**, N.D.

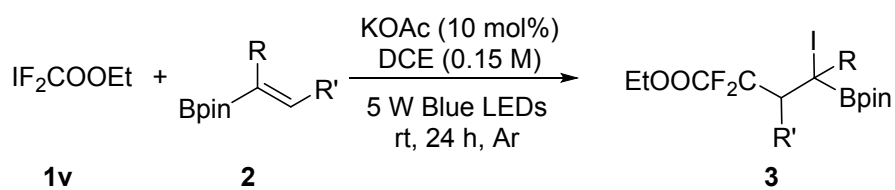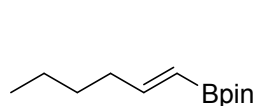

**2c**, <10%  
Low regioselectivity

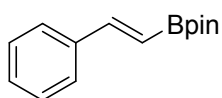

**2d**, N.D.

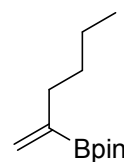

**2e**, <10%

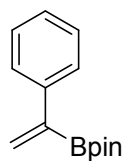

**2f**, N.D.

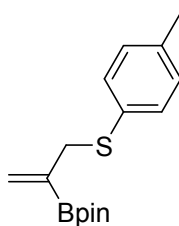

**2g**, N.D.

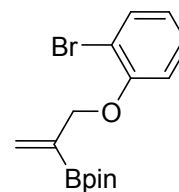

**2y**, trace

## 7. References

1. Rong, J.; Deng, L.; Tan, P.; Ni, C.; Gu, Y.; Hu, J., *Angew. Chem., Int. Ed.* 2016, **55**, 2743-2747.
2. Wang, X.; Liu, G.; Xu, X.-H.; Shibata, N.; Tokunaga, E.; Shibata, N., *Angew. Chem., Int. Ed.* 2014, **53**, 1827-1831.
3. Korzynski, M. D.; Borys, K. M.; Bialek, J.; Ochal, Z., *Tetrahedron Letters* 2014, **55**, 745-748.
4. Jagannathan, S.; Forsyth, T. P.; Kettner, C. A., *J. Org. Chem* 2001, **66**, 6375-6380.
5. Cheng, Y.; Mück-Lichtenfeld, C.; Studer, A., *Angew. Chem., Int. Ed.* 2018, **57**, 16832-16836.
6. Zhao, B.; Li, Z.; Wu, Y.; Wang, Y.; Qian, J.; Yuan, Y.; Shi, Z., *Angew. Chem., Int. Ed.* 2019, **58**, 9448-9452.
7. Cheng, Y.; Muck-Lichtenfeld, C.; Studer, A., *J. Am. Chem. Soc.* 2018, **140**, 6221-6225.
8. Nie, X.; Cheng, C.; Zhu, G. *Angew. Chem., Int. Ed.* 2017, **56**, 1898.

## 8. Crystal data and structure refinement for 3m (CCDC 2058412)

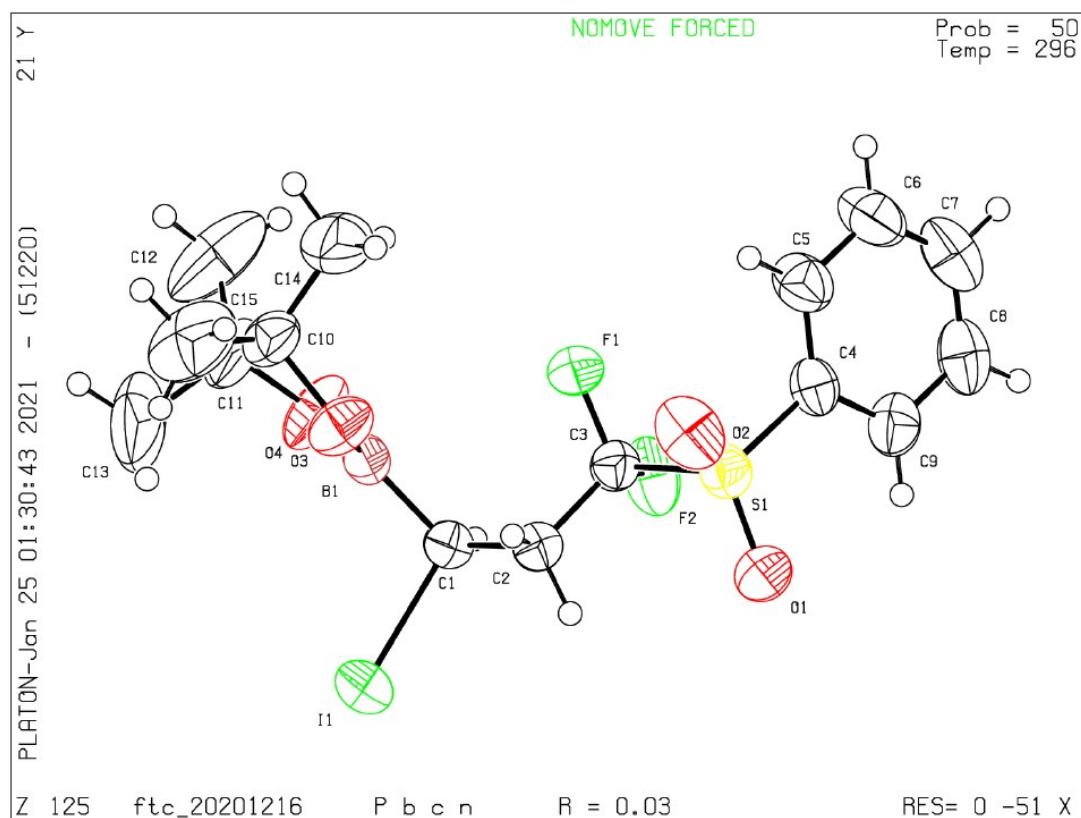

|                                         |                                 |                     |             |
|-----------------------------------------|---------------------------------|---------------------|-------------|
| Bond precision:                         | C-C = 0.0060 Å                  | Wavelength=0.71073  |             |
| Cell:                                   | a=21.746(5)                     | b=10.386(3)         | c=17.254(4) |
|                                         | alpha=90                        | beta=90             | gamma=90    |
| Temperature:                            | 296 K                           |                     |             |
|                                         | Calculated                      | Reported            |             |
| Volume                                  | 3896.9(17)                      | 3896.9(17)          |             |
| Space group                             | P b c n                         | P b c n             |             |
| Hall group                              | -P 2n 2ab                       | -P 2n 2ab           |             |
| Moiety formula                          | C15 H20 B F2 I O4 S             | C15 H20 B F2 I O4 S |             |
| Sum formula                             | C15 H20 B F2 I O4 S             | C15 H20 B F2 I O4 S |             |
| Mr                                      | 472.08                          | 472.08              |             |
| Dx,g cm-3                               | 1.609                           | 1.609               |             |
| Z                                       | 8                               | 8                   |             |
| Mu (mm-1)                               | 1.783                           | 1.783               |             |
| F000                                    | 1872.0                          | 1872.0              |             |
| F000'                                   | 1870.15                         |                     |             |
| h,k,lmax                                | 24,11,19                        | 24,11,19            |             |
| Nref                                    | 2995                            | 2994                |             |
| Tmin,Tmax                               | 0.807,0.899                     | 0.654,0.745         |             |
| Tmin'                                   | 0.807                           |                     |             |
| Correction method= # Reported T Limits: | Tmin=0.654                      | Tmax=0.745          |             |
| AbsCorr = MULTI-SCAN                    |                                 |                     |             |
| Data completeness= 1.000                | Theta(max)= 23.814              |                     |             |
| R(reflections)= 0.0276( 2446)           | wR2(reflections)= 0.0699( 2994) |                     |             |
| S = 1.025                               | Npar= 221                       |                     |             |

## 9. Copies of NMR spectra of all new compounds

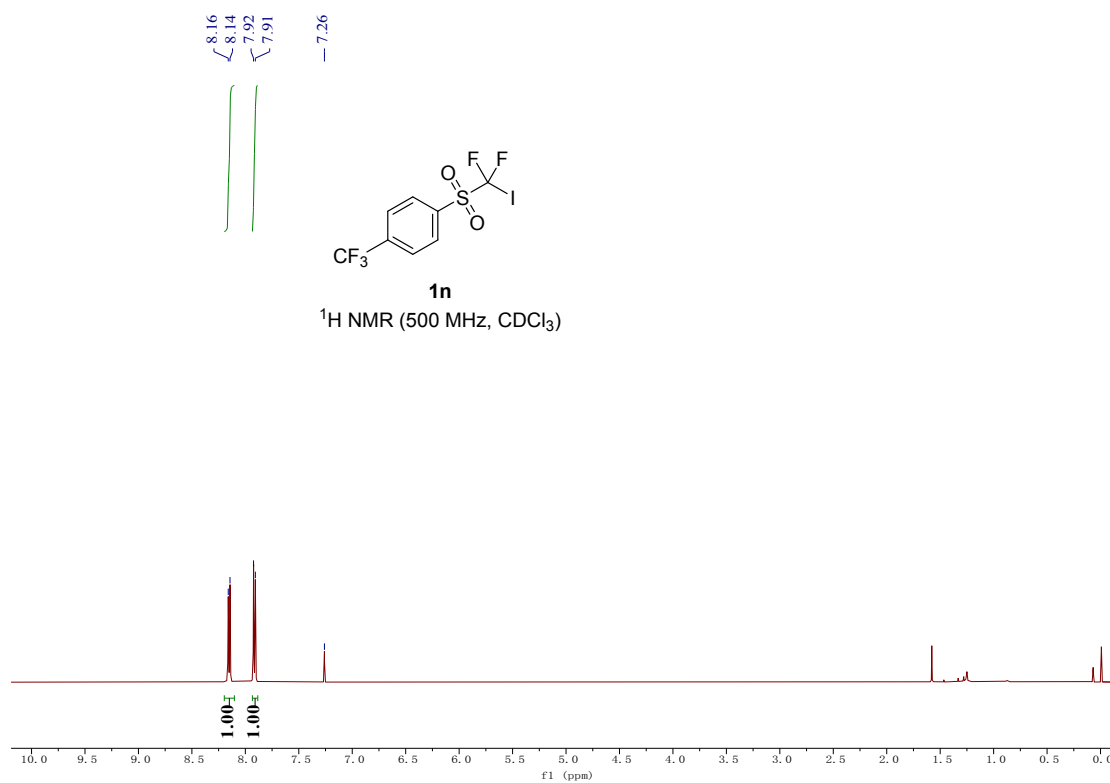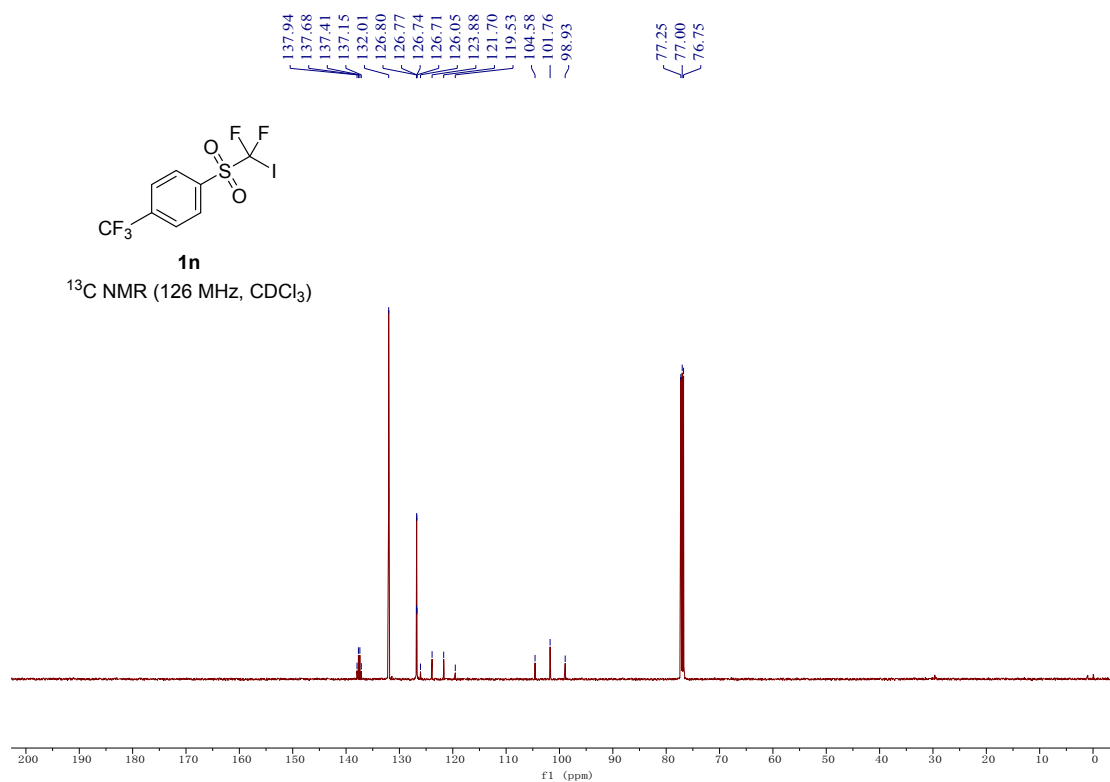

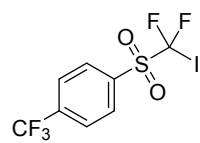

**1n**

<sup>19</sup>F NMR (471 MHz, CDCl<sub>3</sub>)

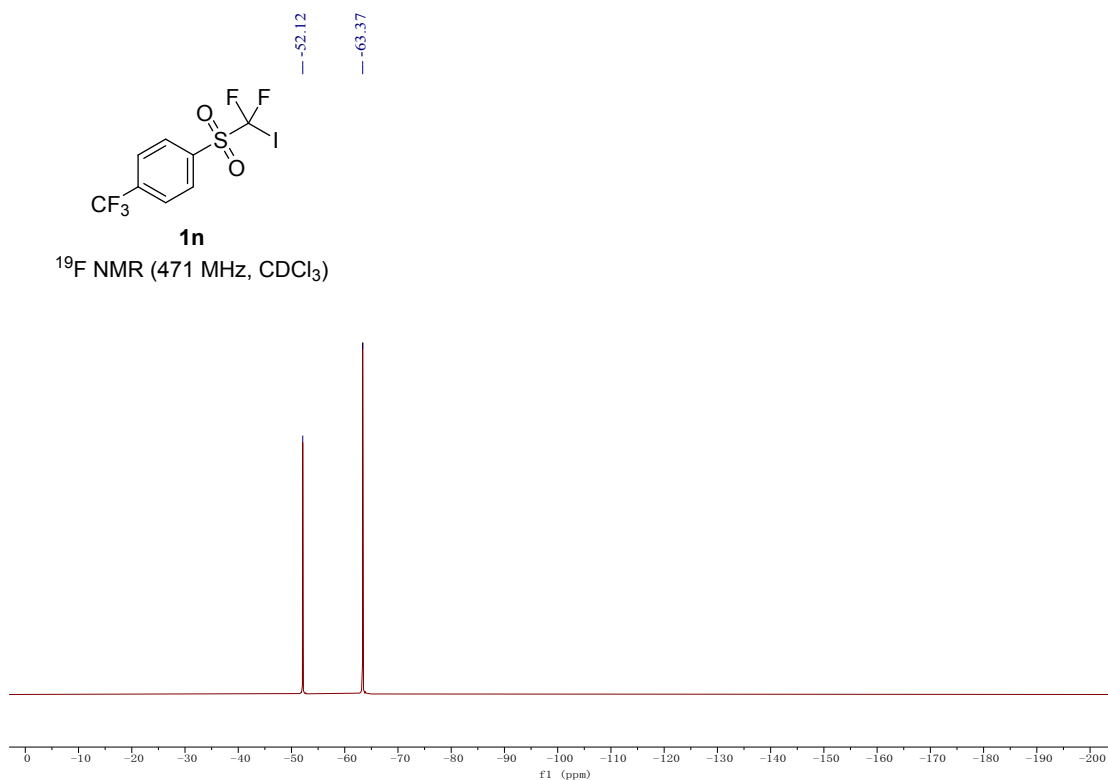

8.04  
8.04  
8.03  
8.03  
8.02  
8.02  
8.01  
7.34  
7.34  
7.33  
7.33  
7.32  
7.31  
7.31  
7.26

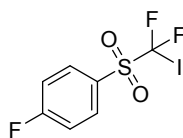

**1o**

<sup>1</sup>H NMR (500 MHz, CDCl<sub>3</sub>)

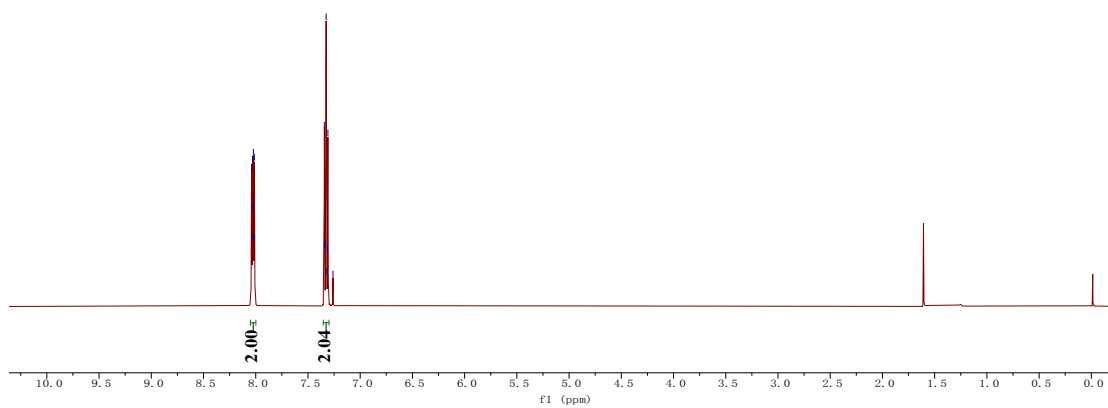

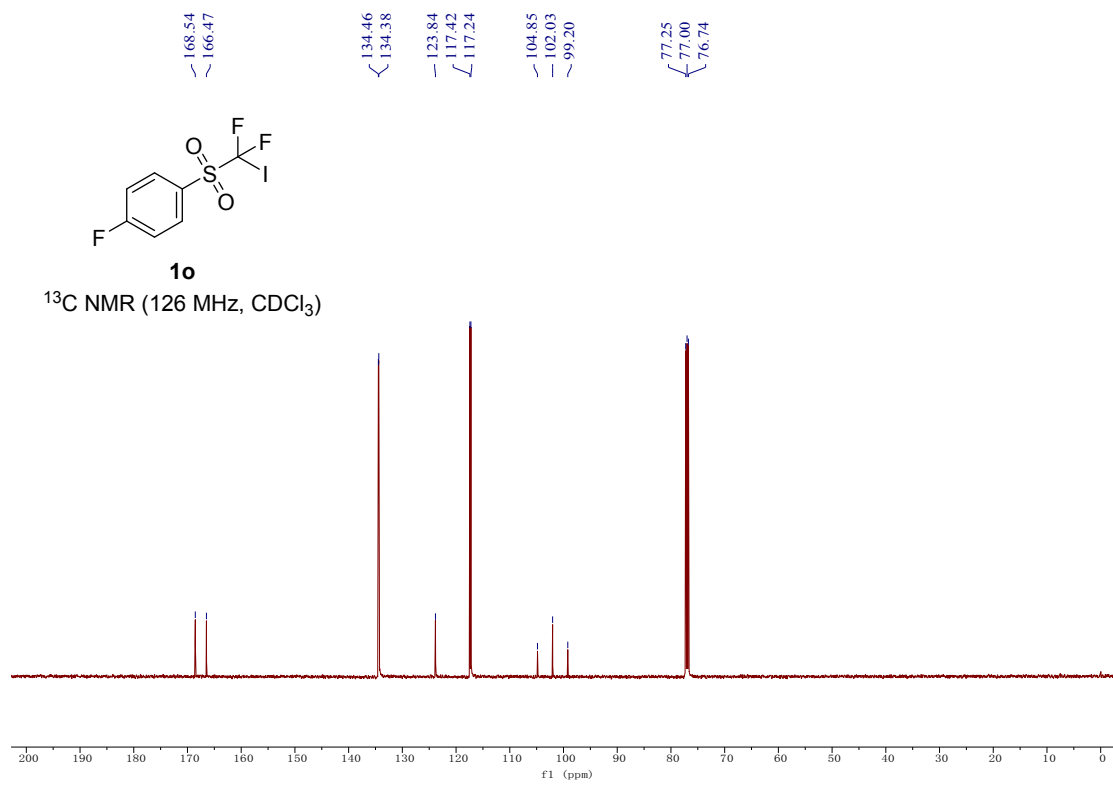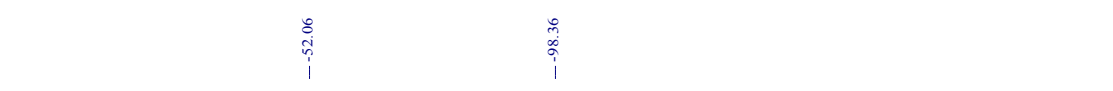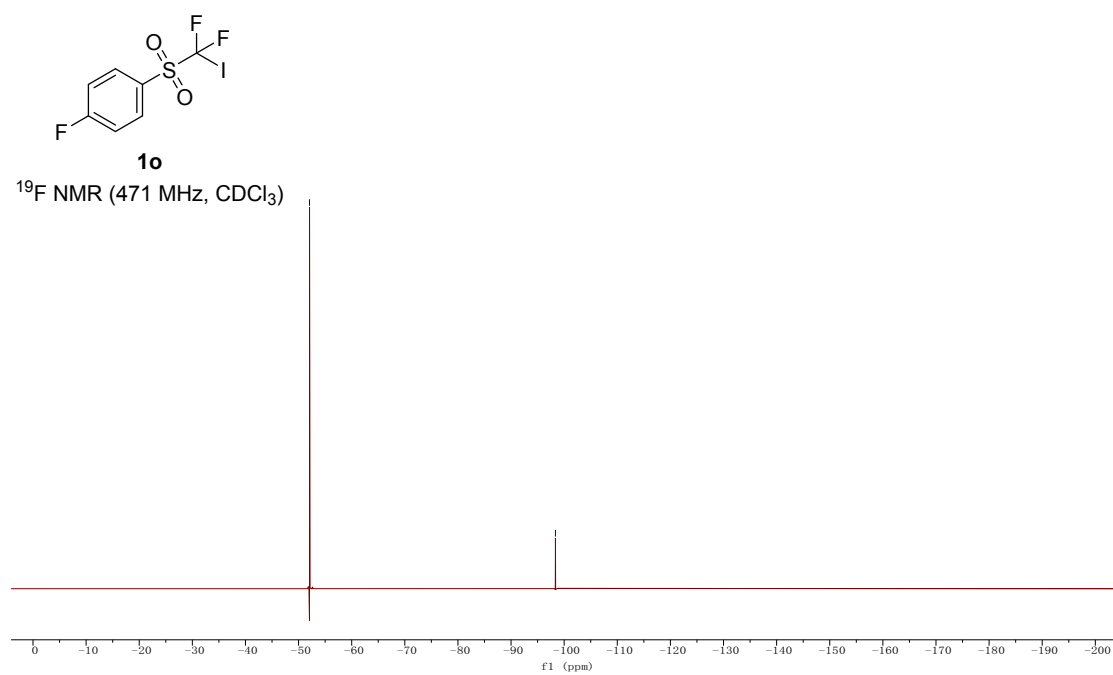

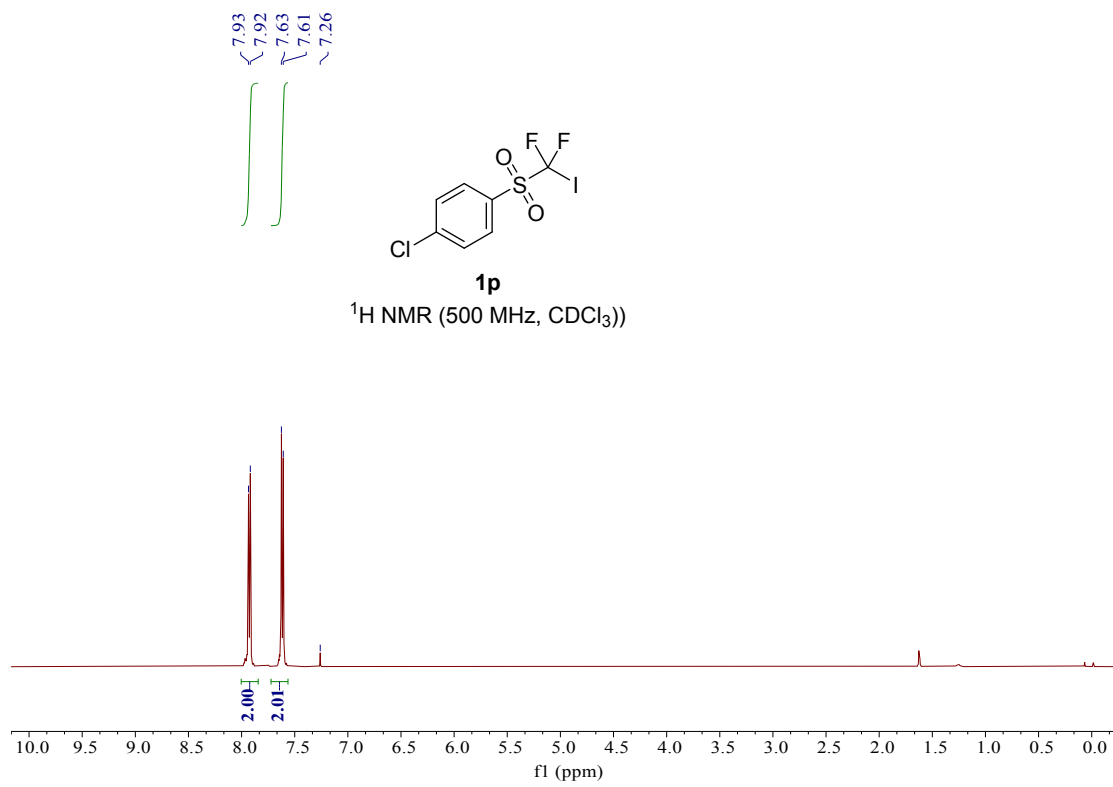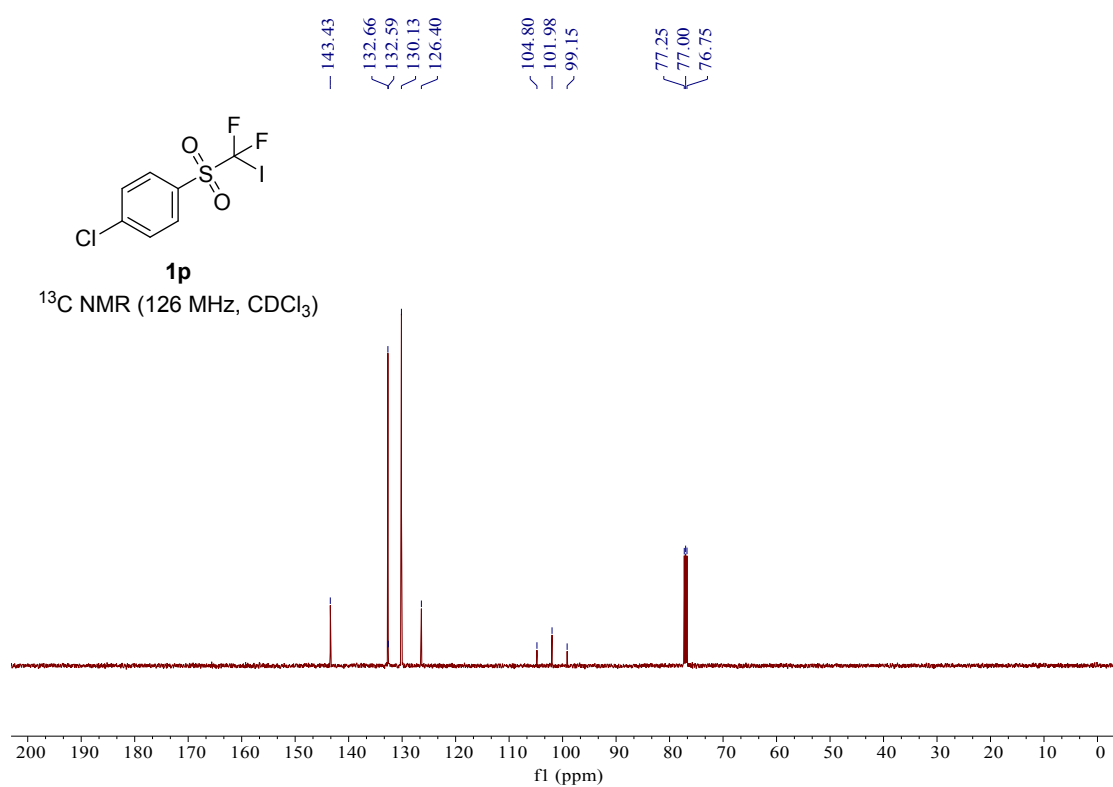



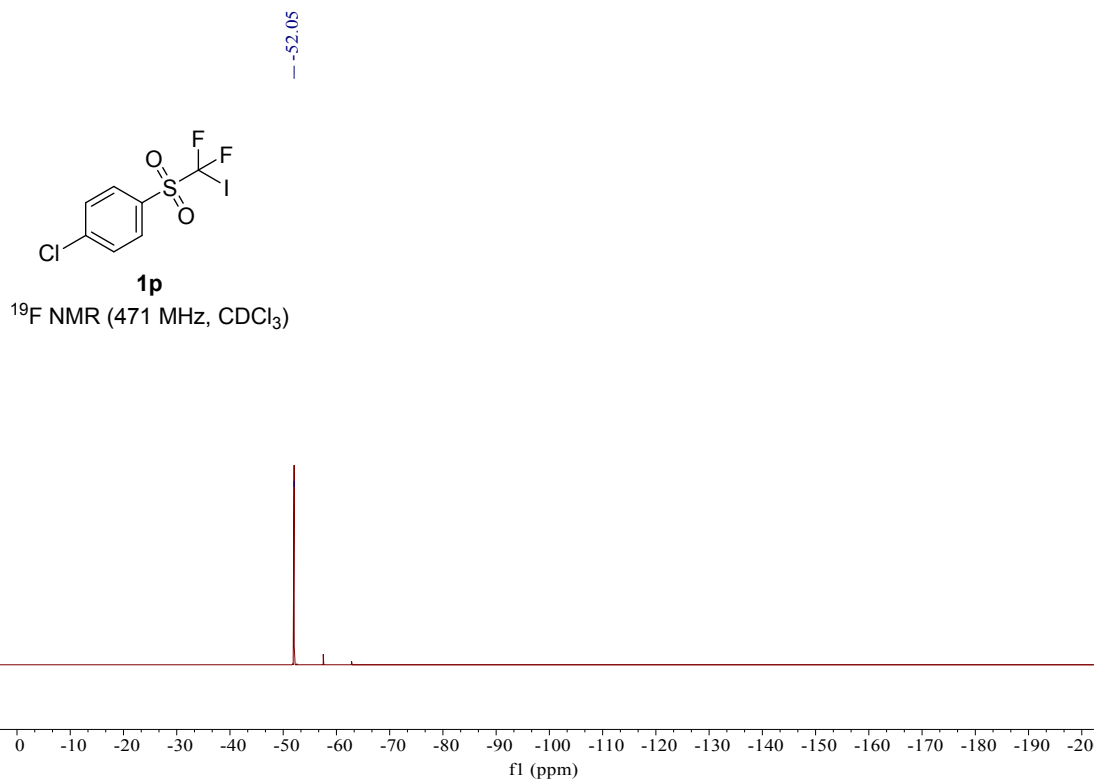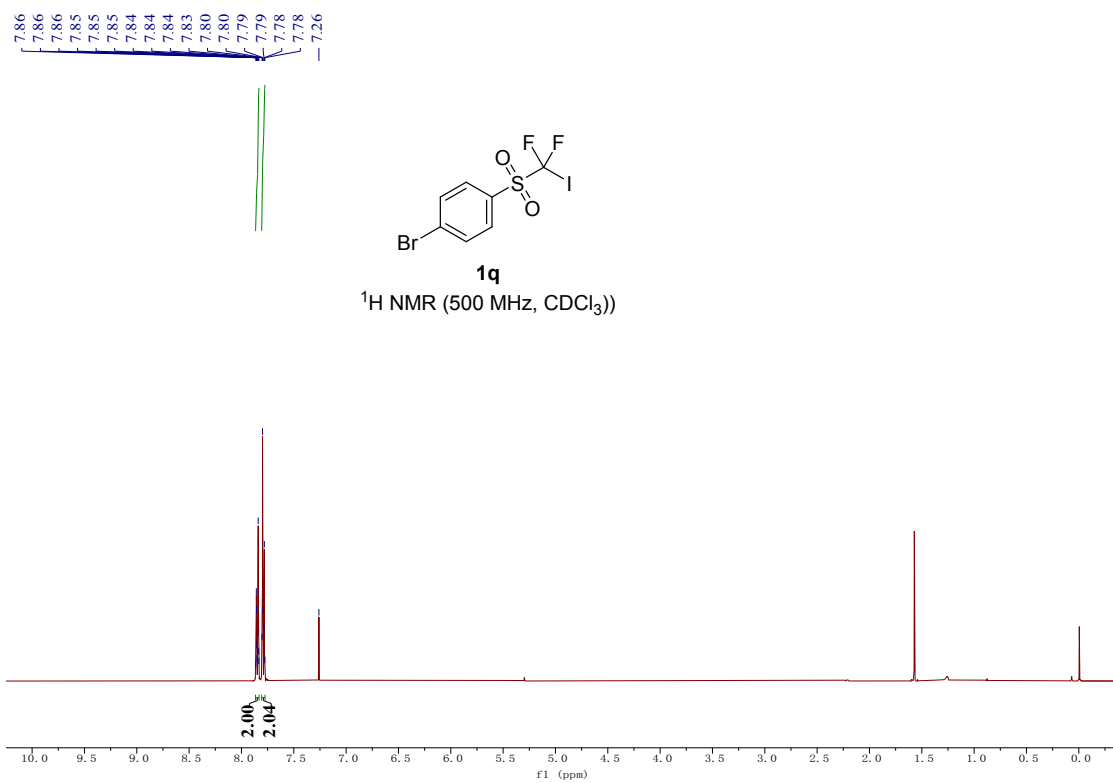

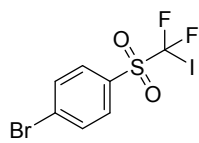

**1q**

<sup>13</sup>C NMR (126 MHz, CDCl<sub>3</sub>)

133.15  
132.65  
132.29  
127.03

104.81  
101.98  
99.16

77.25  
77.00  
76.75

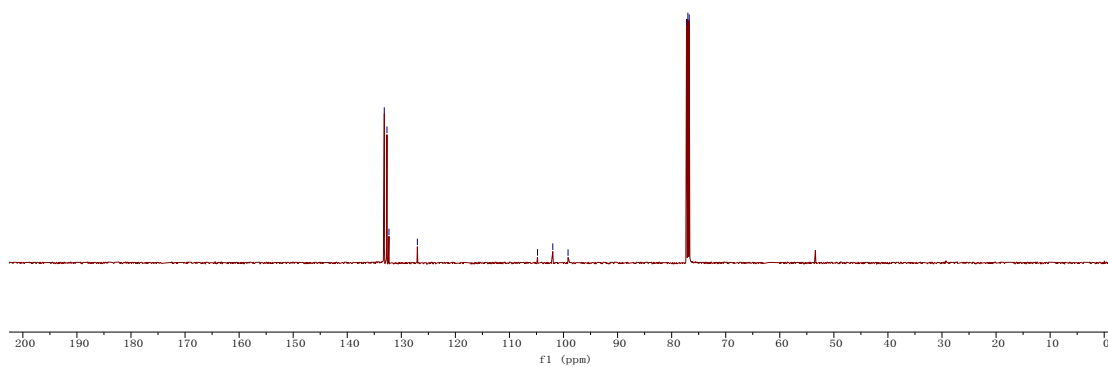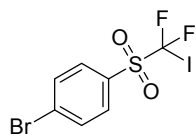

**1q**

<sup>19</sup>F NMR (471 MHz, CDCl<sub>3</sub>)

-52.02

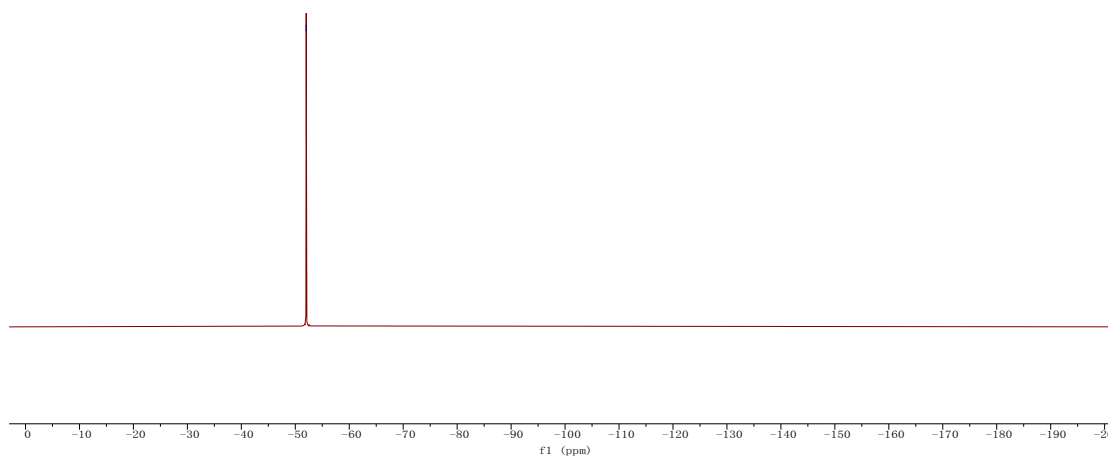

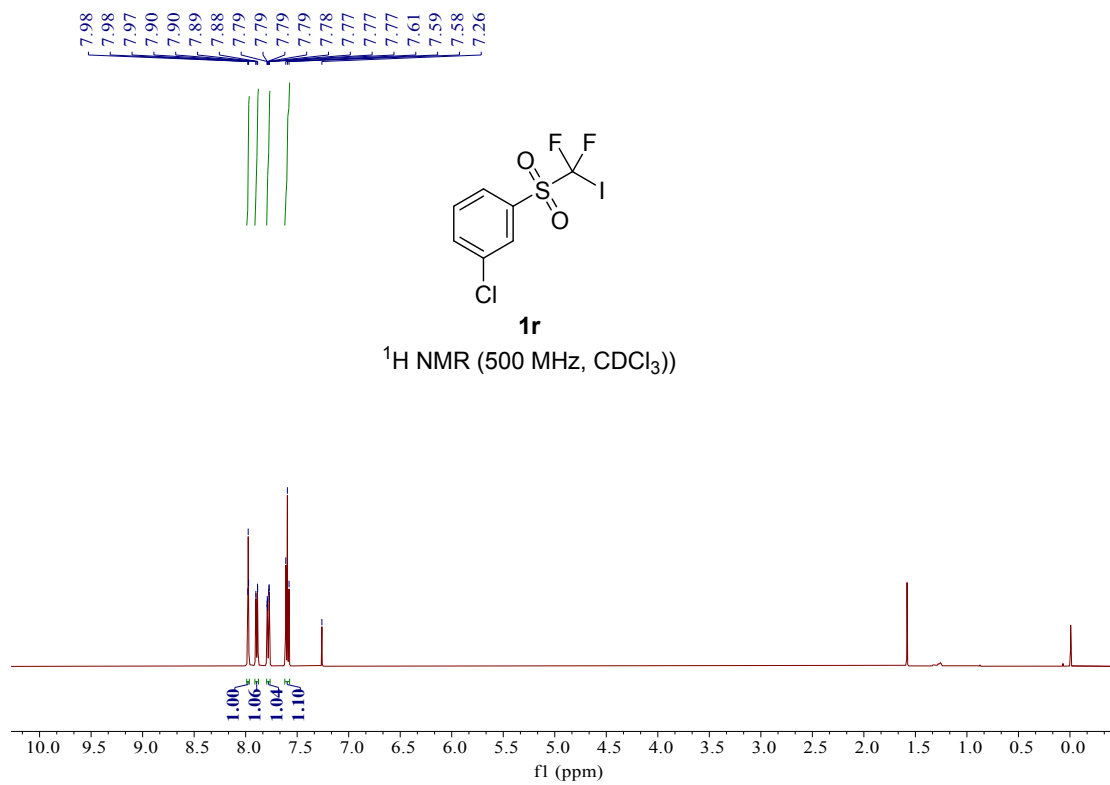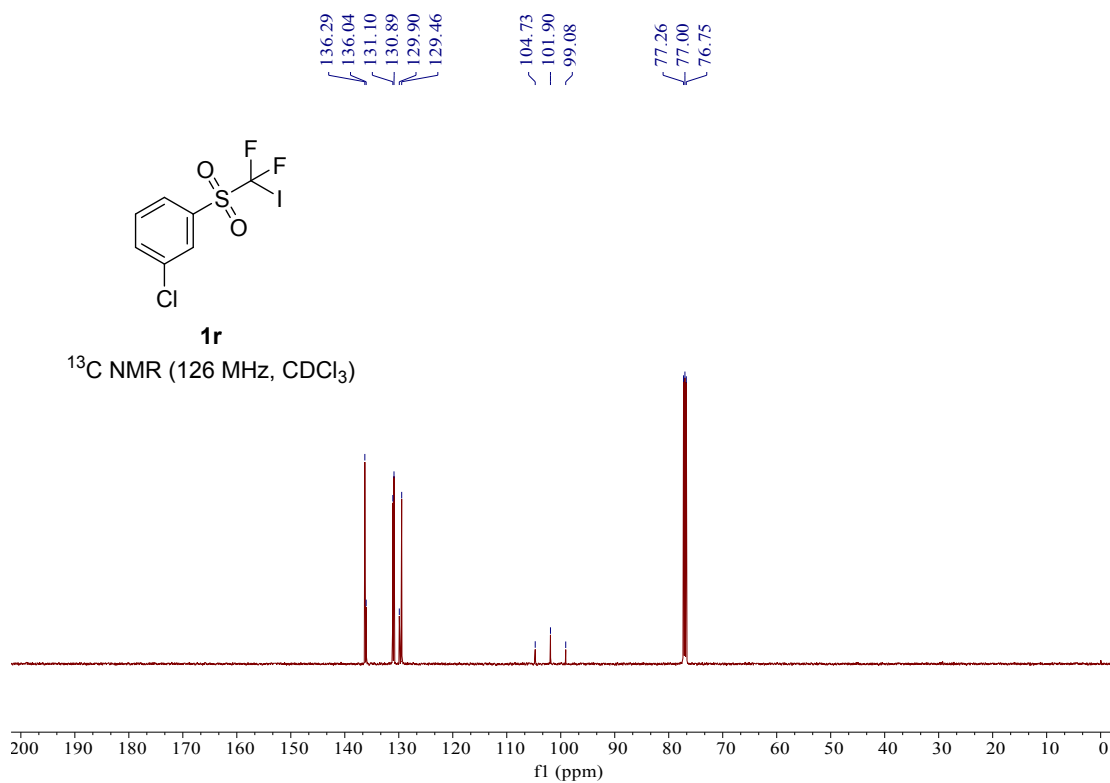

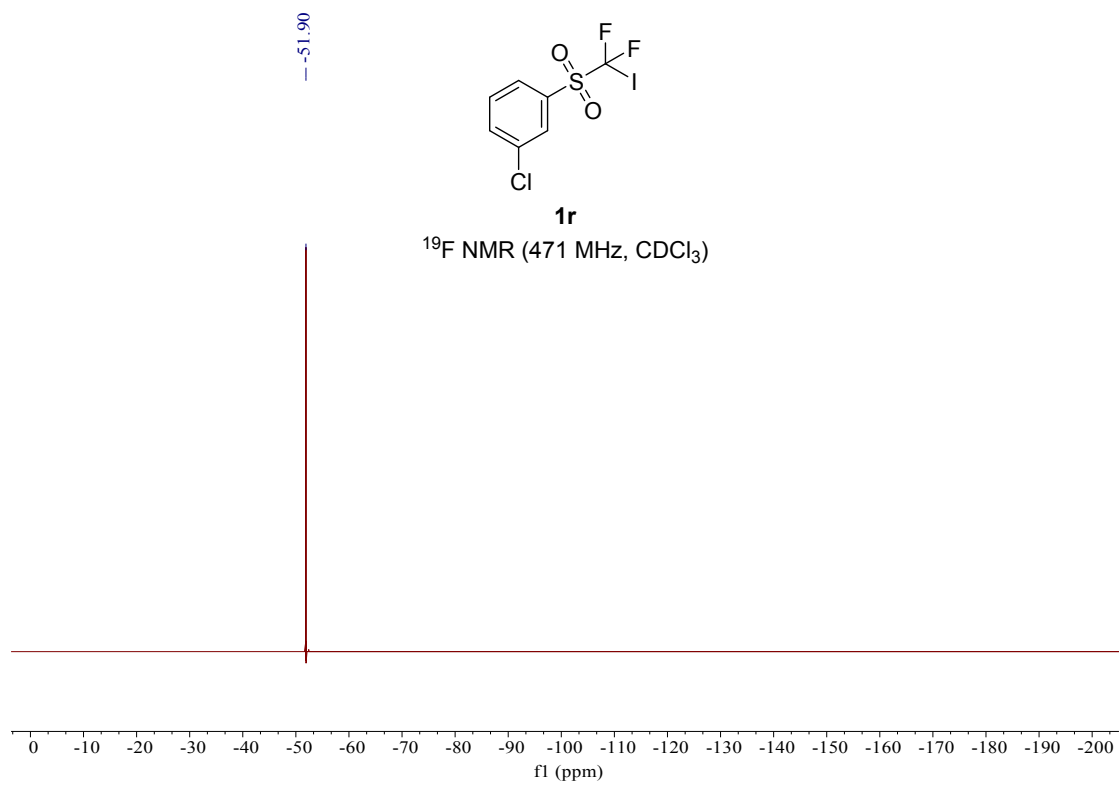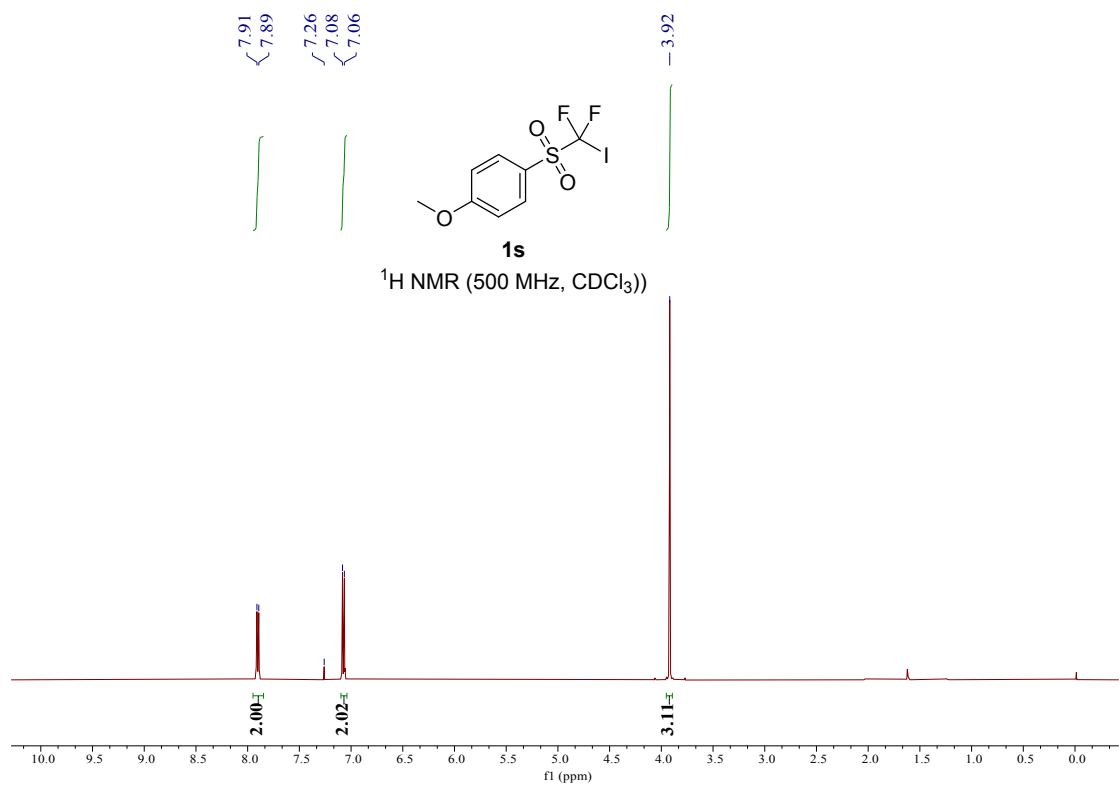

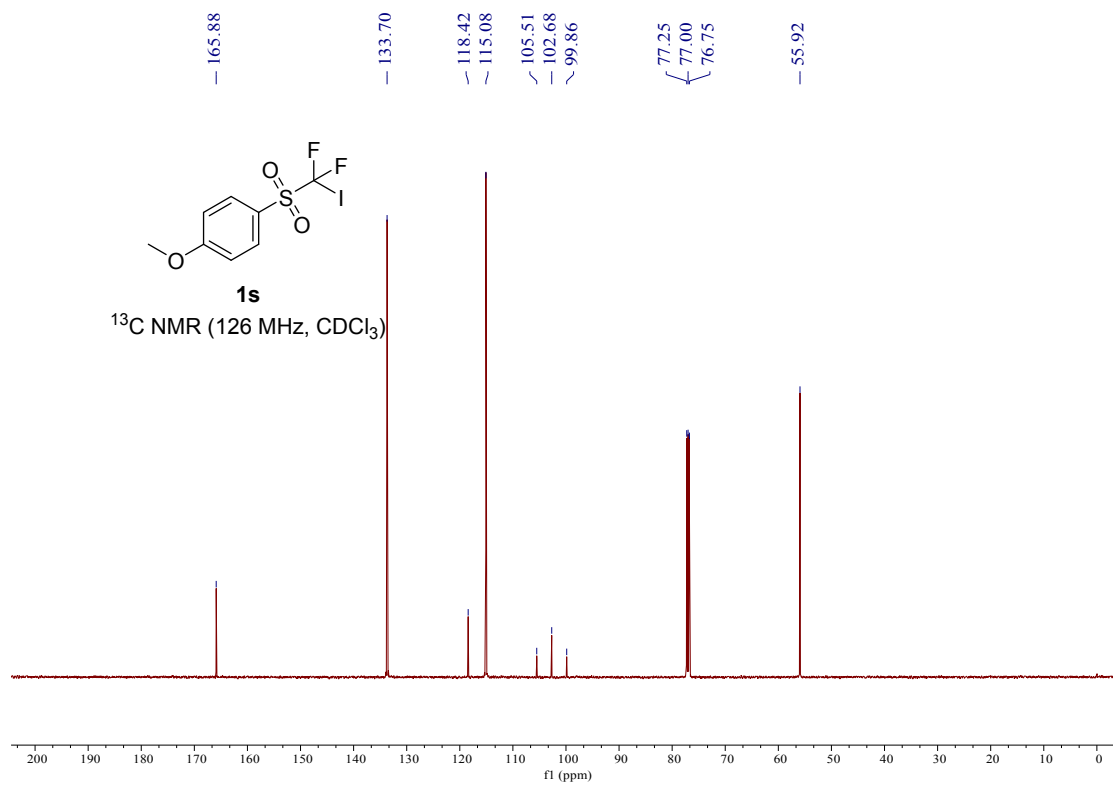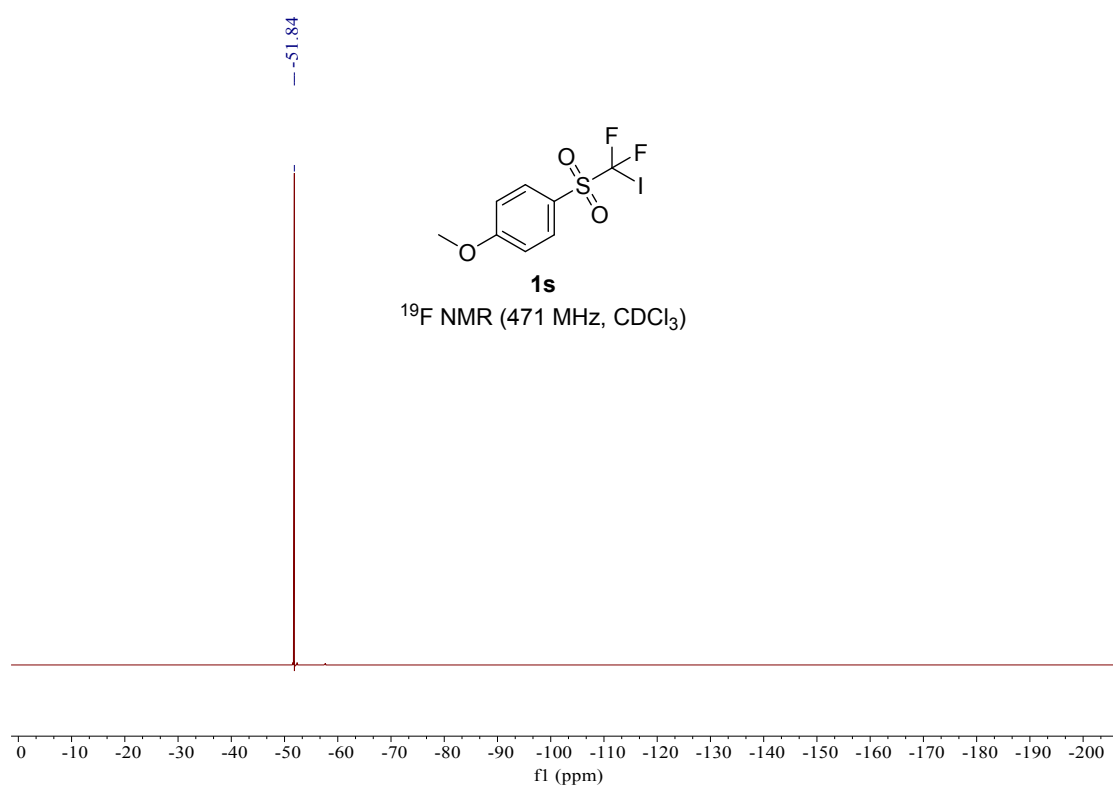

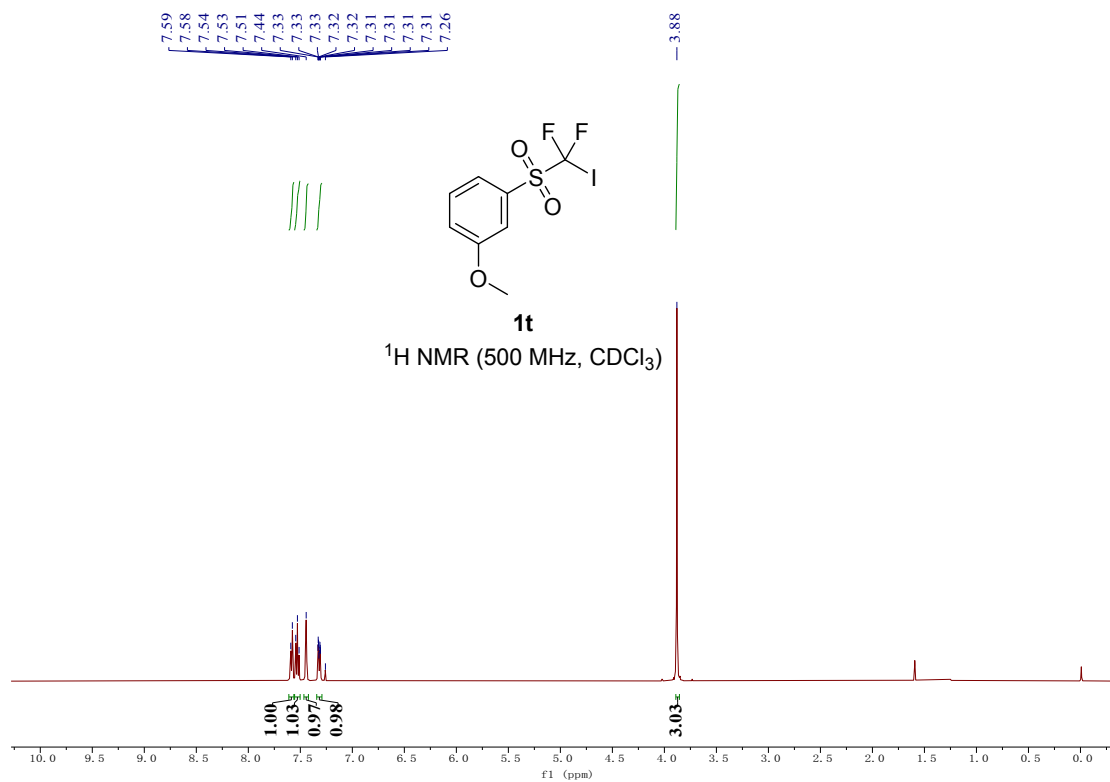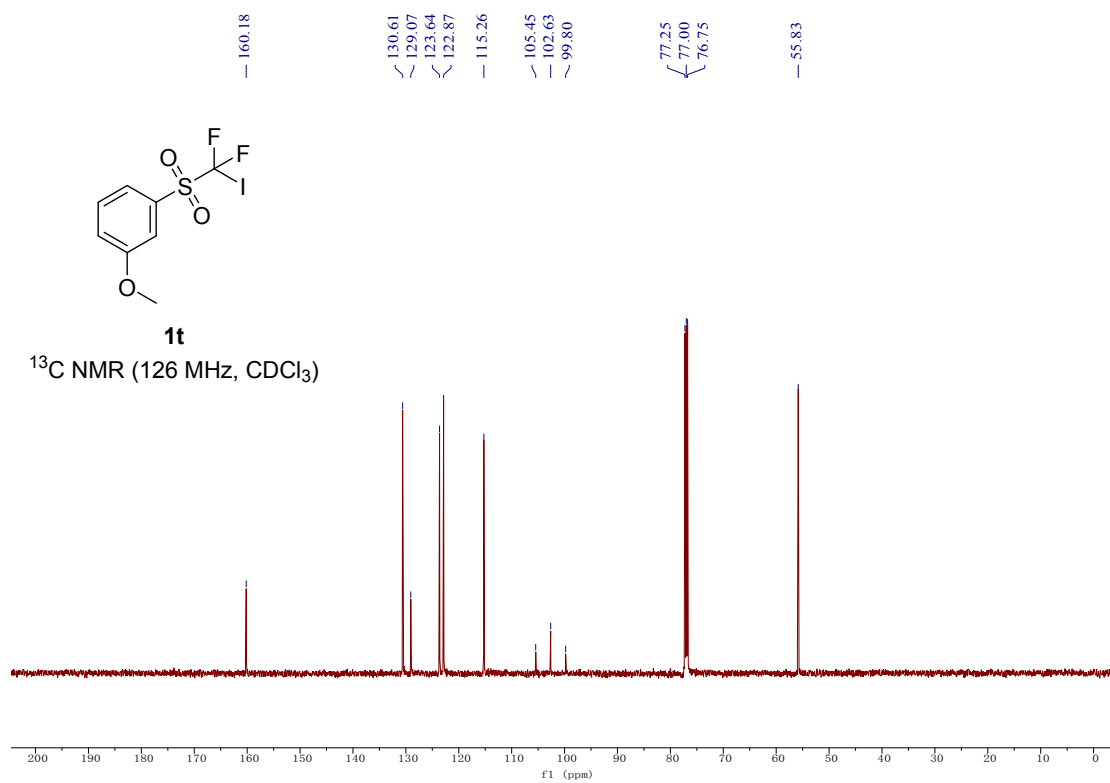

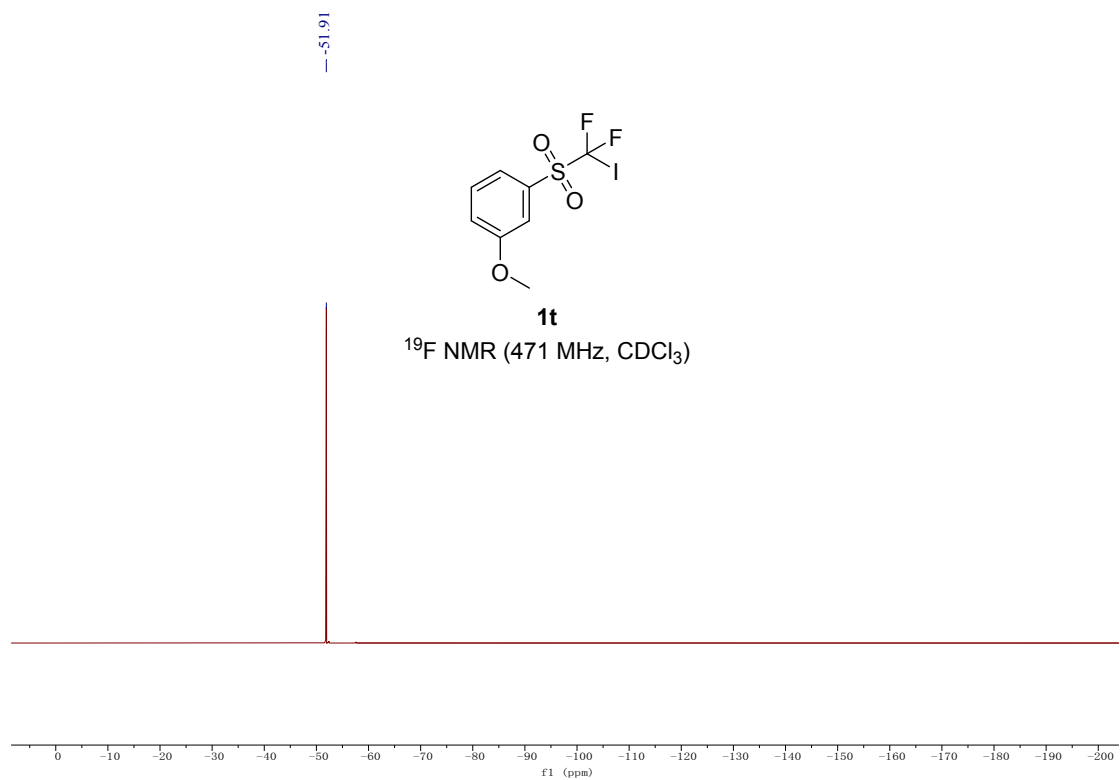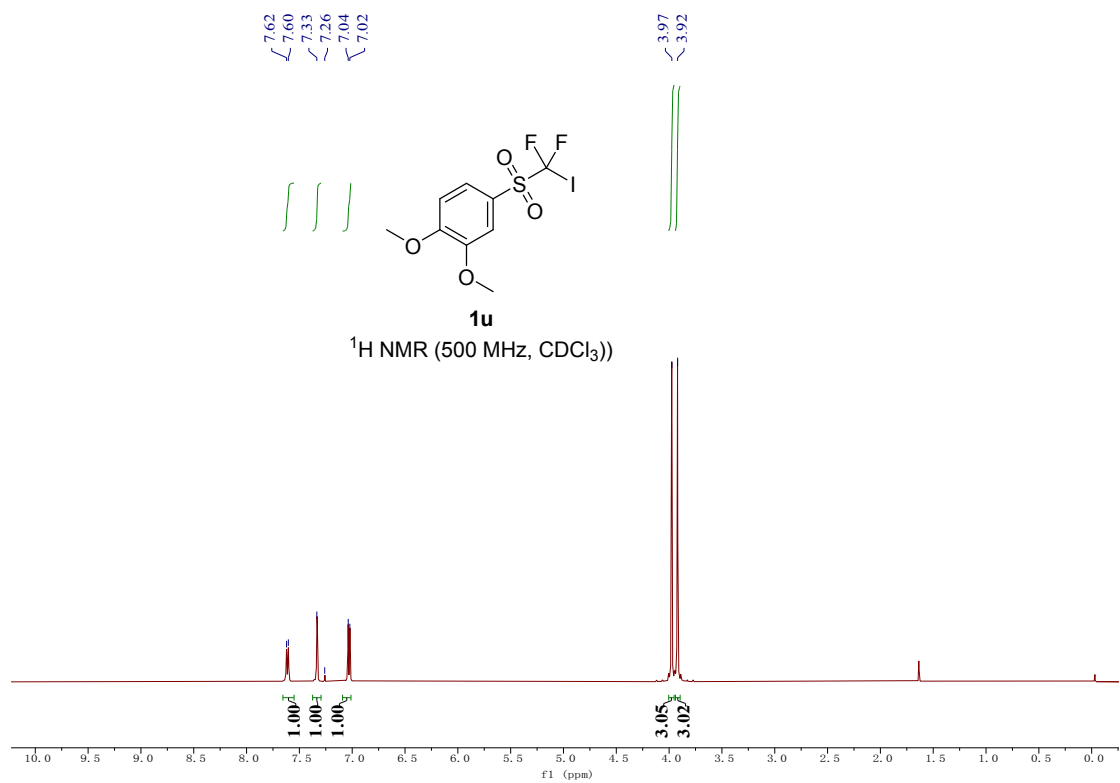

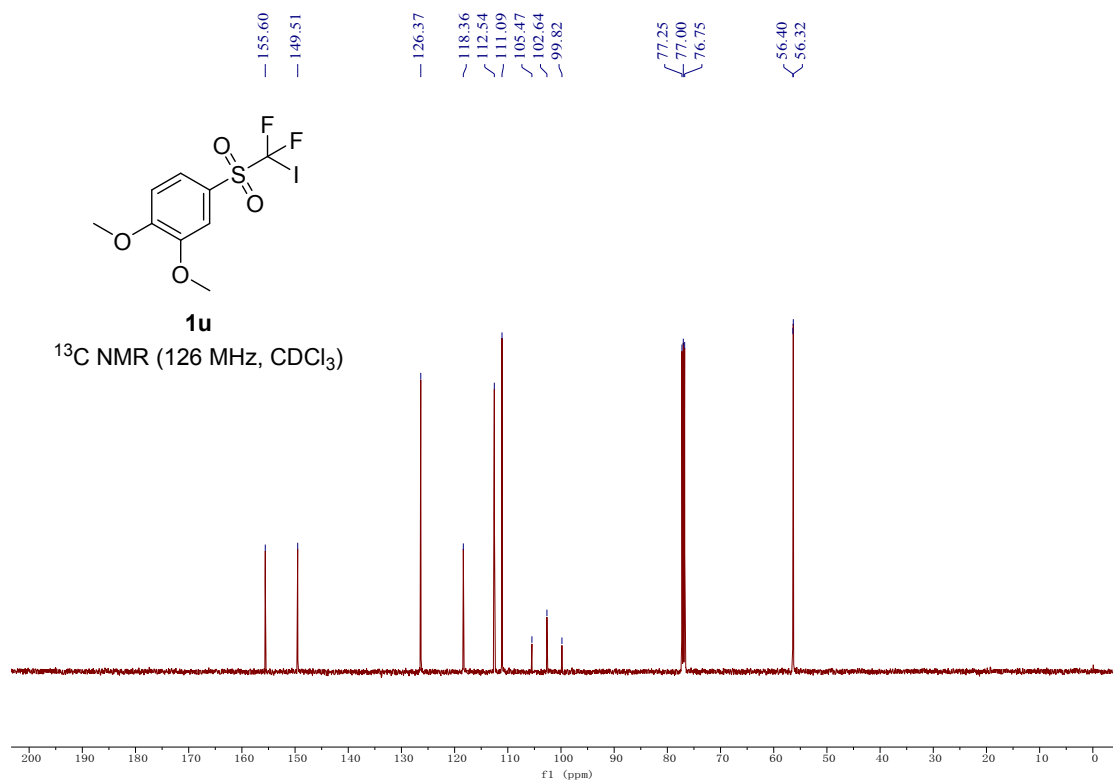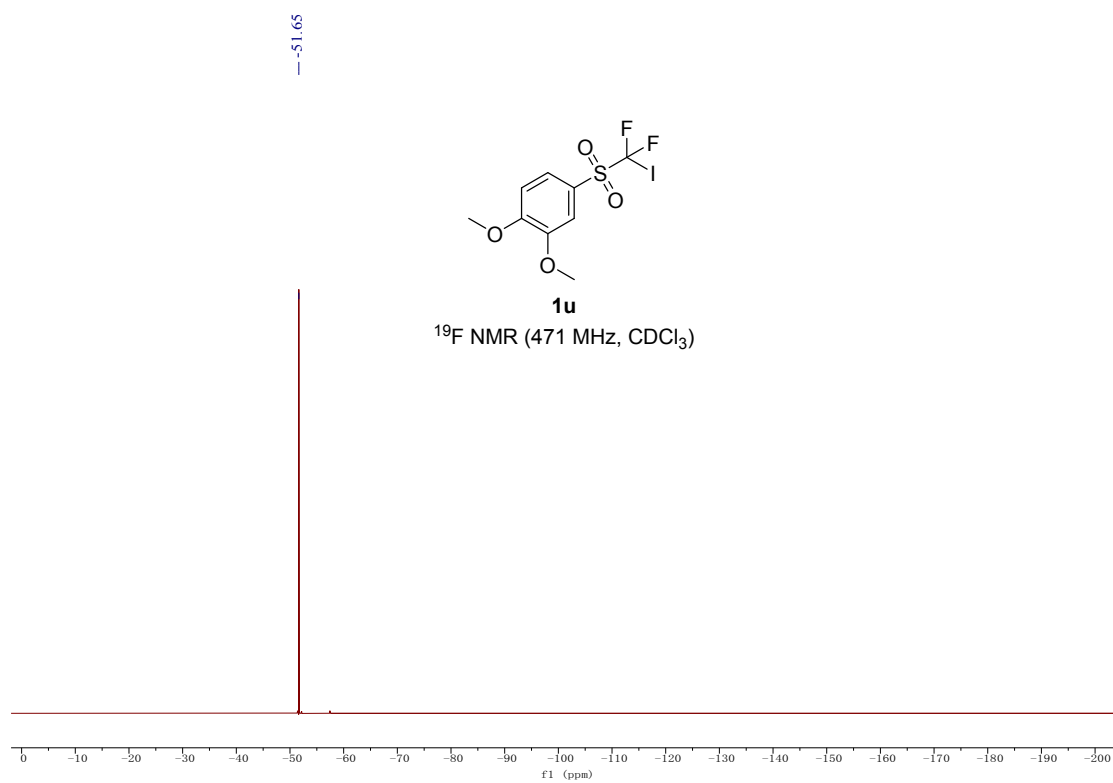



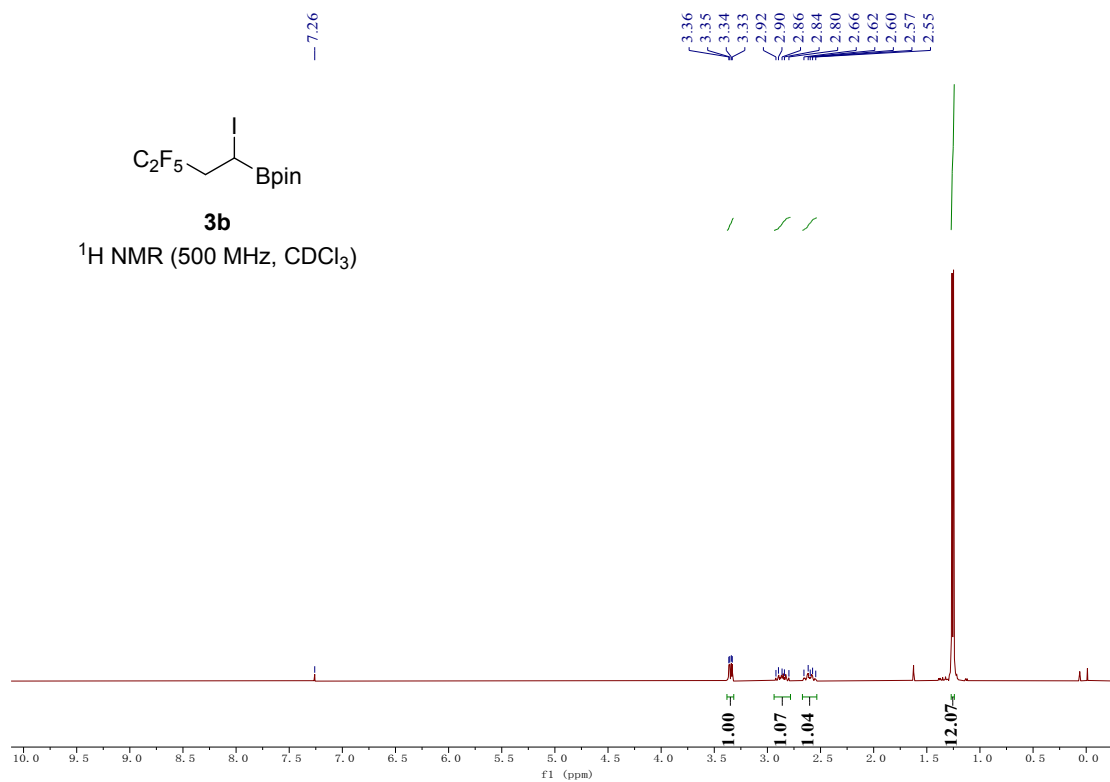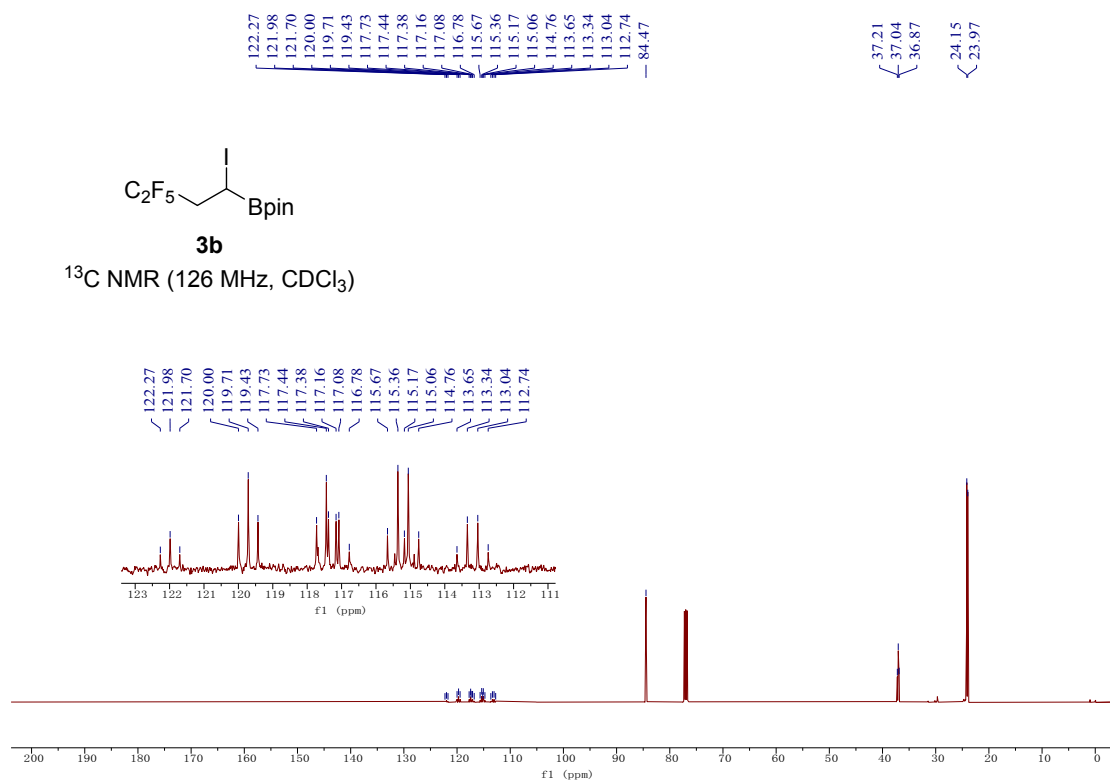

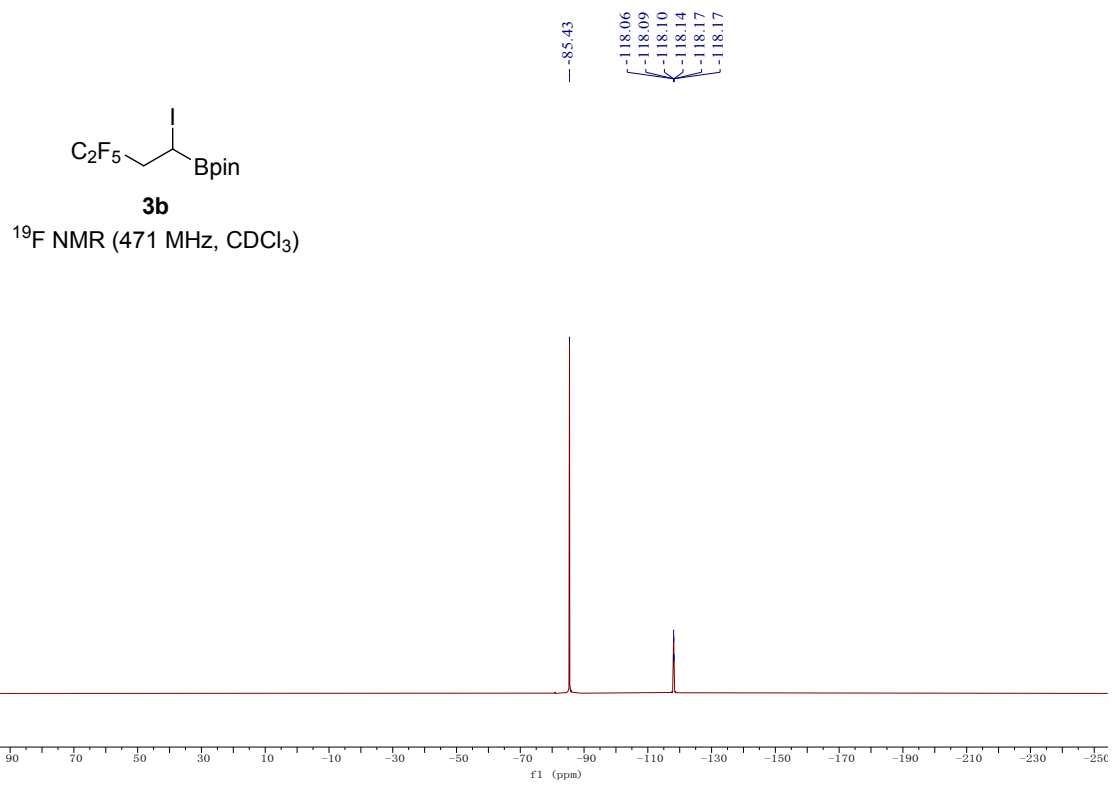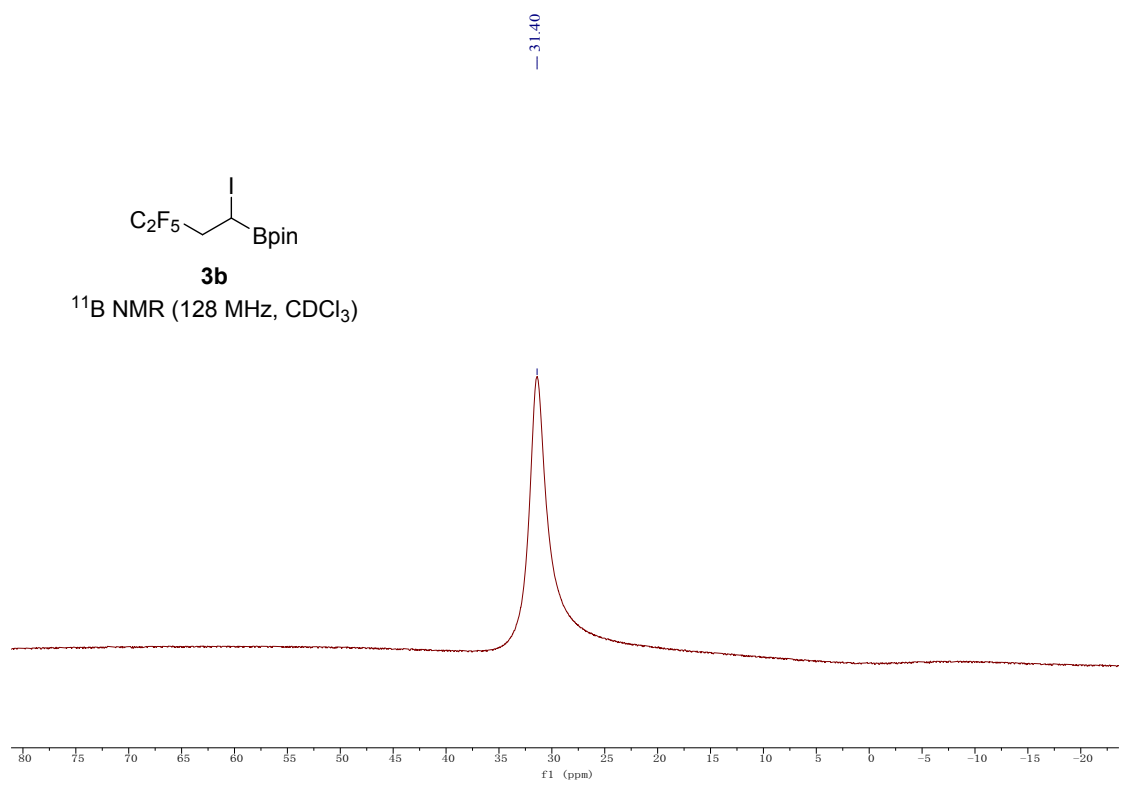

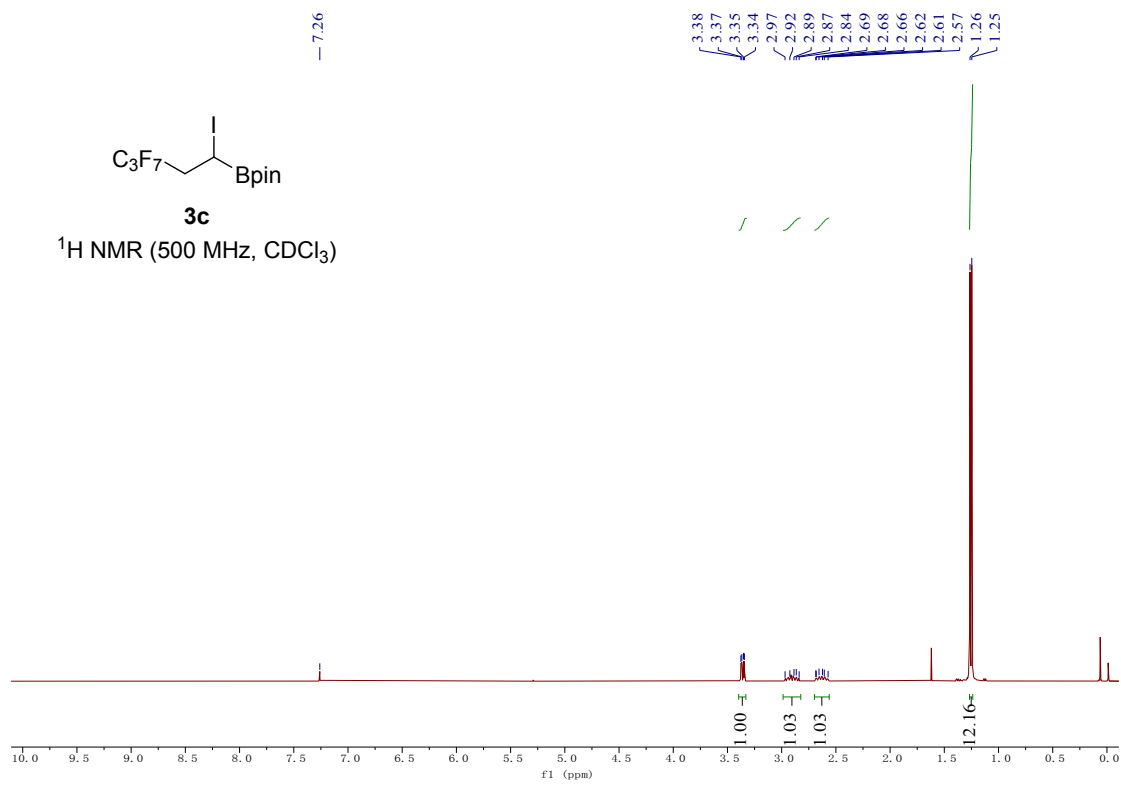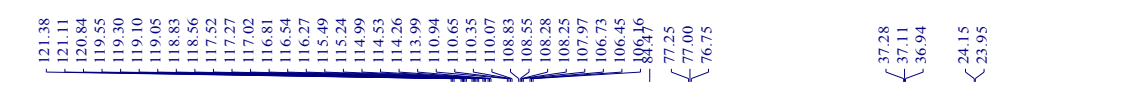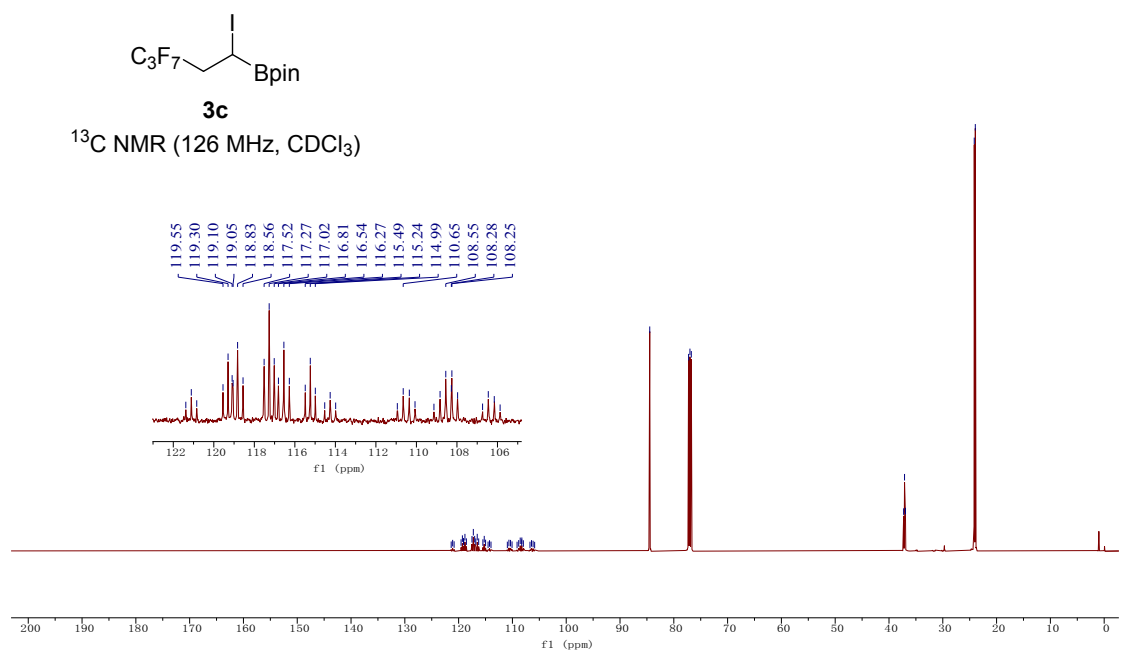

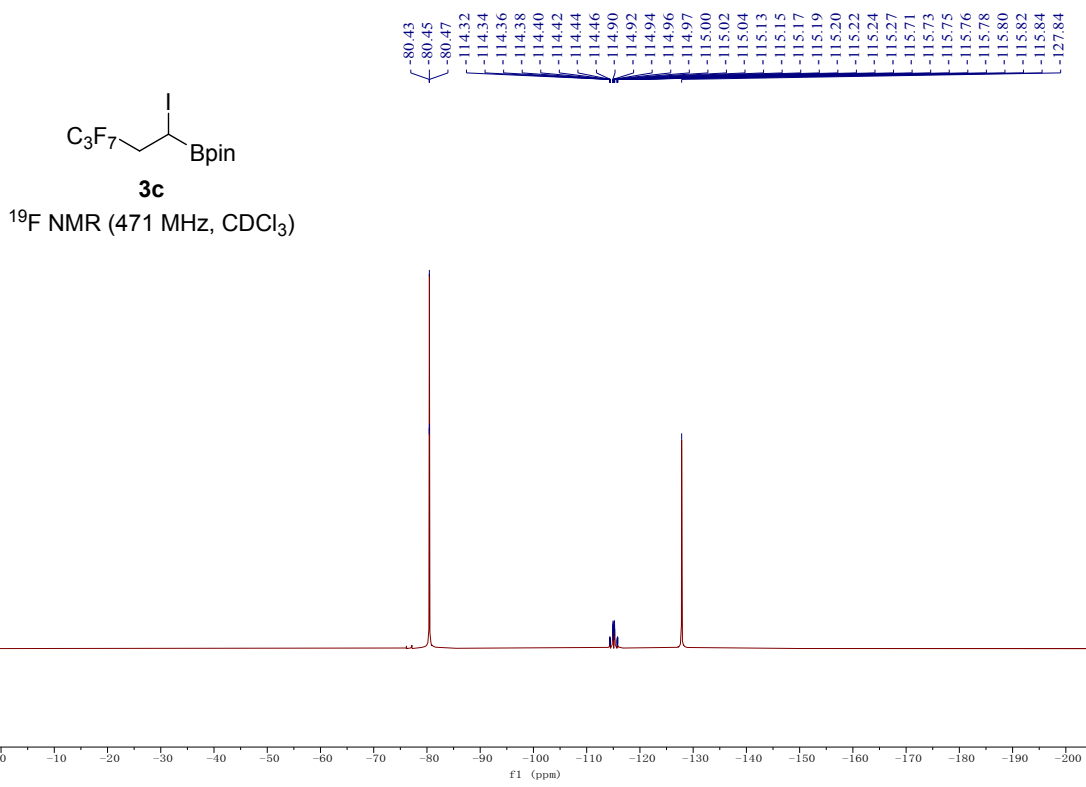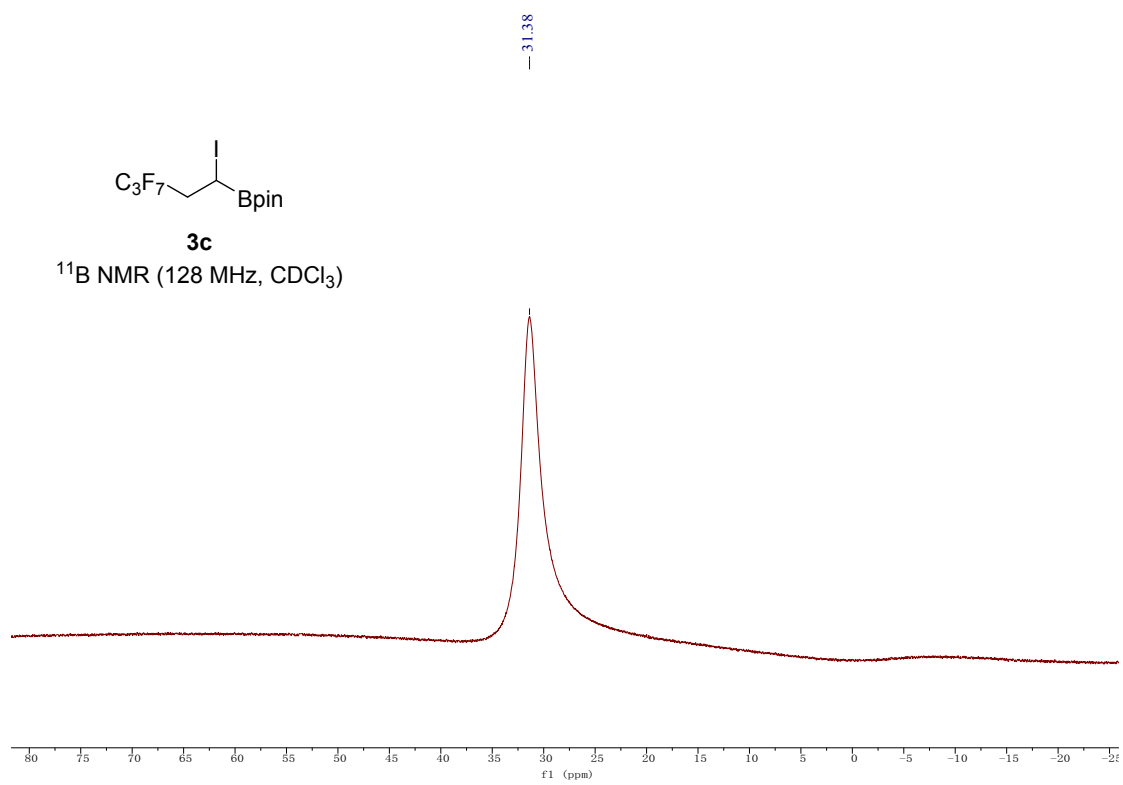

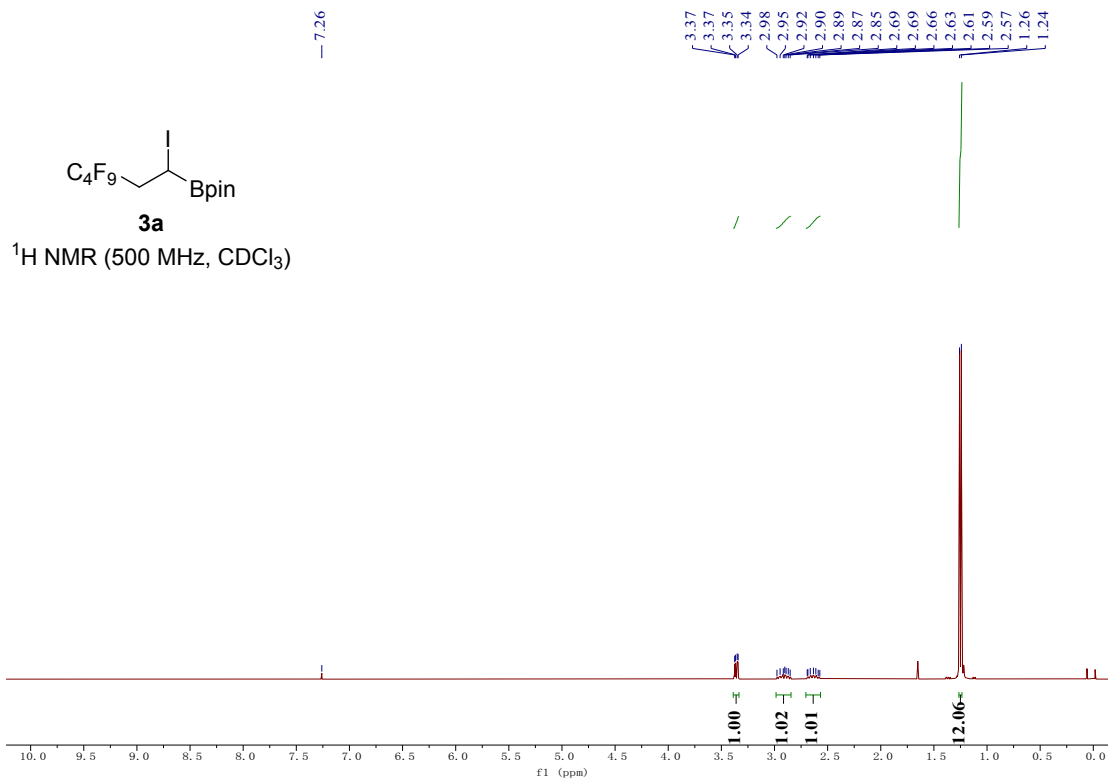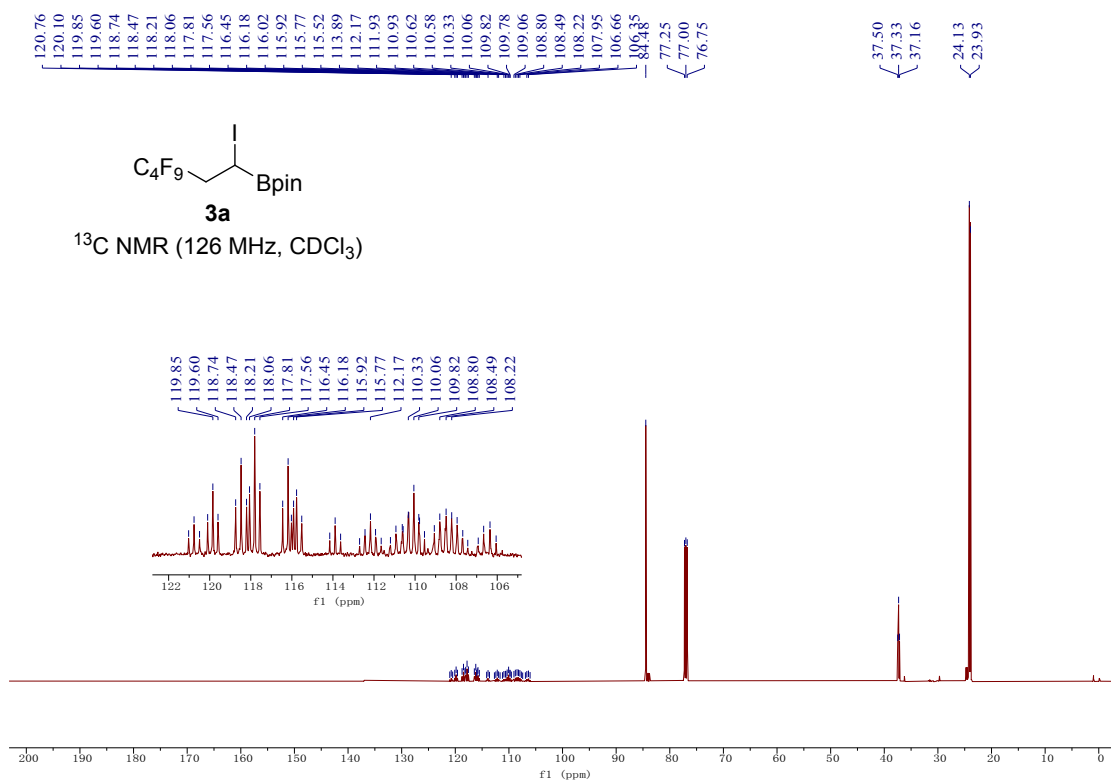

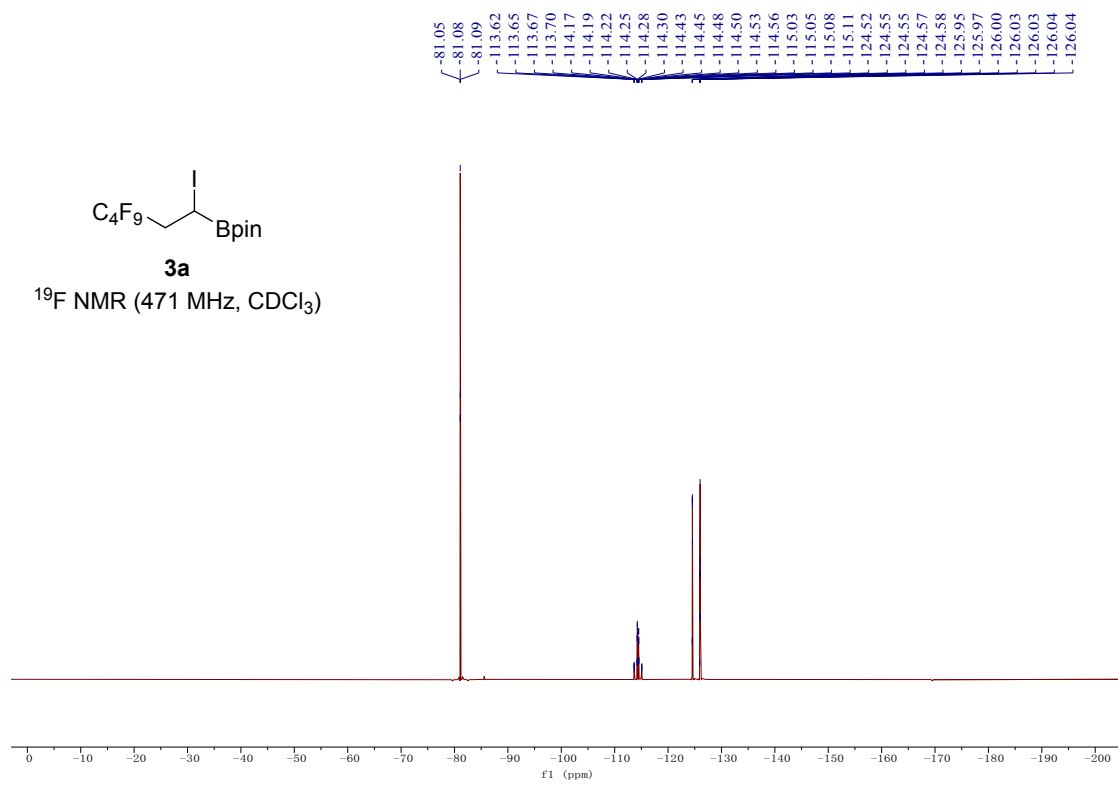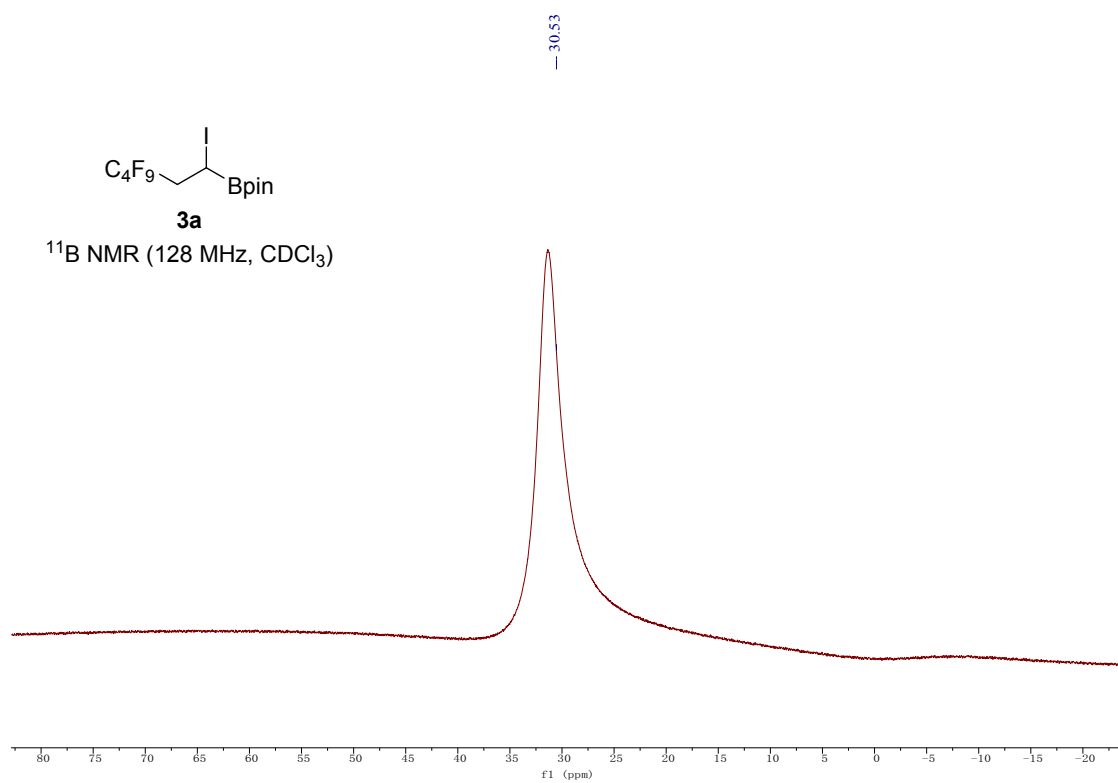

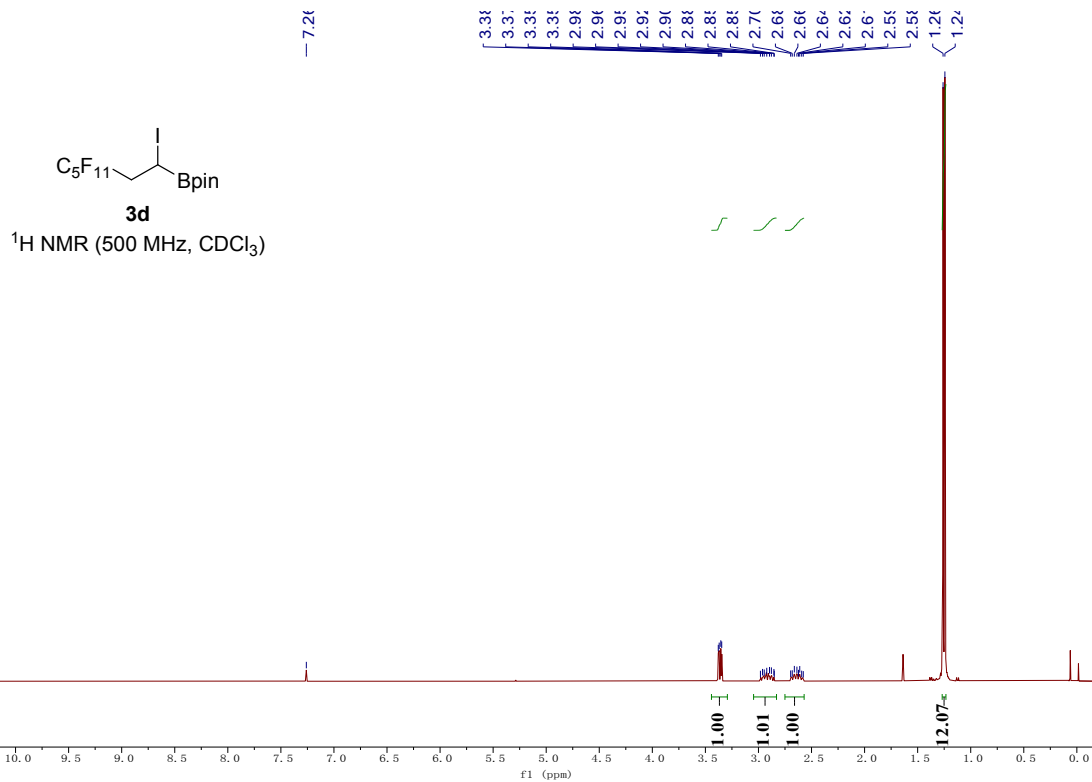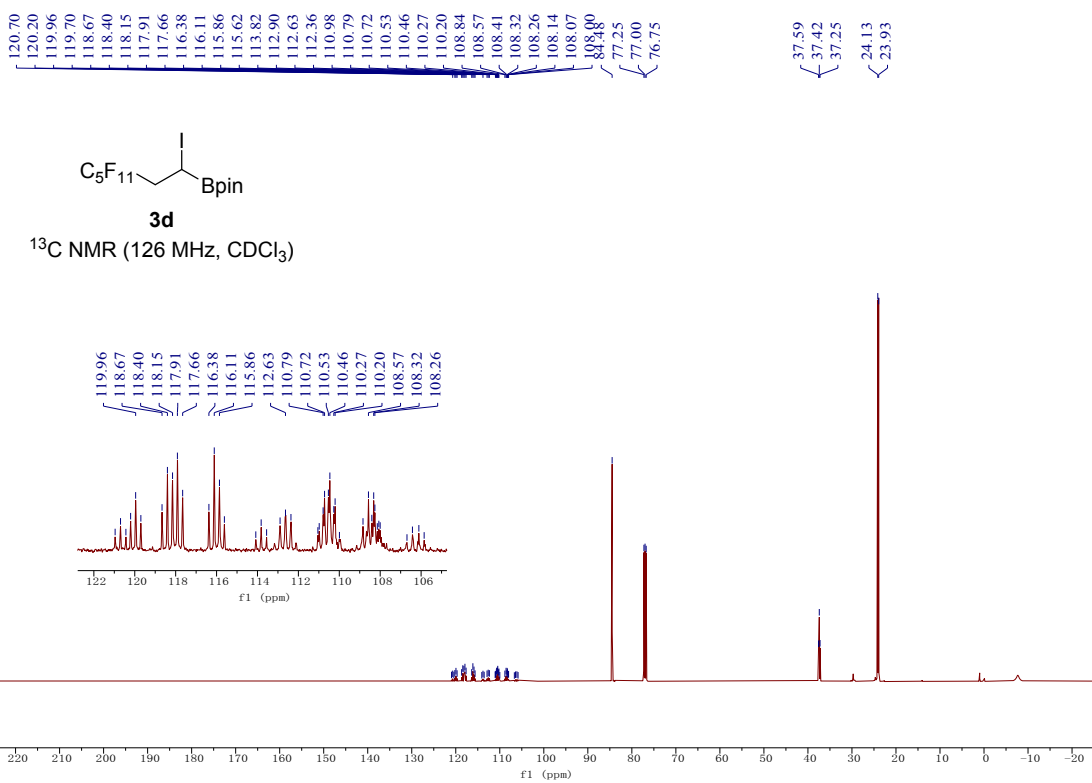

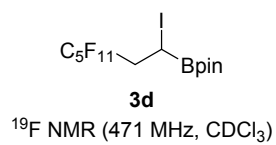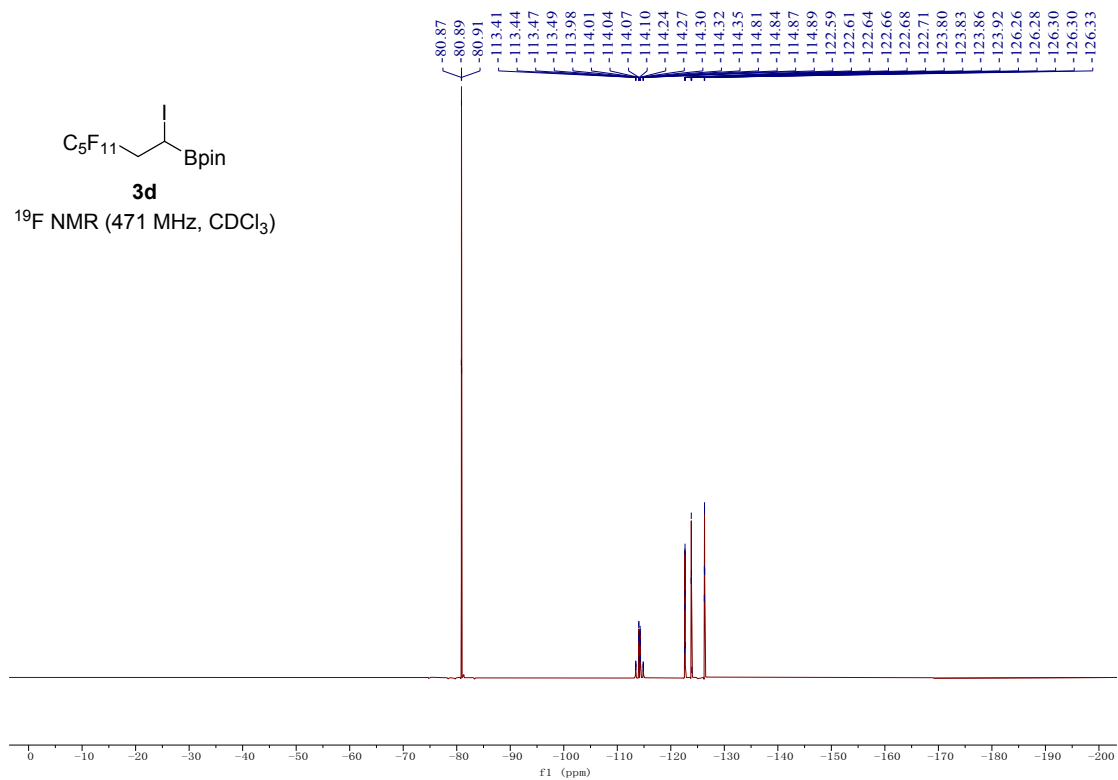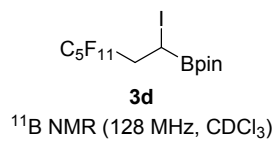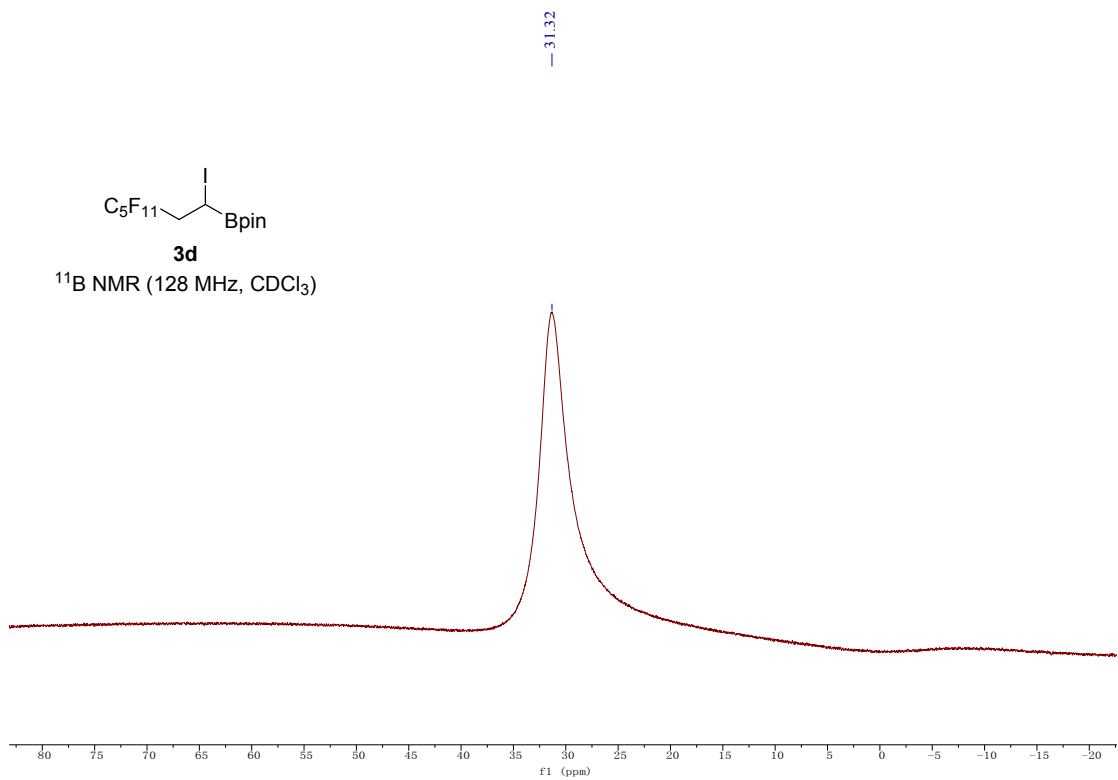



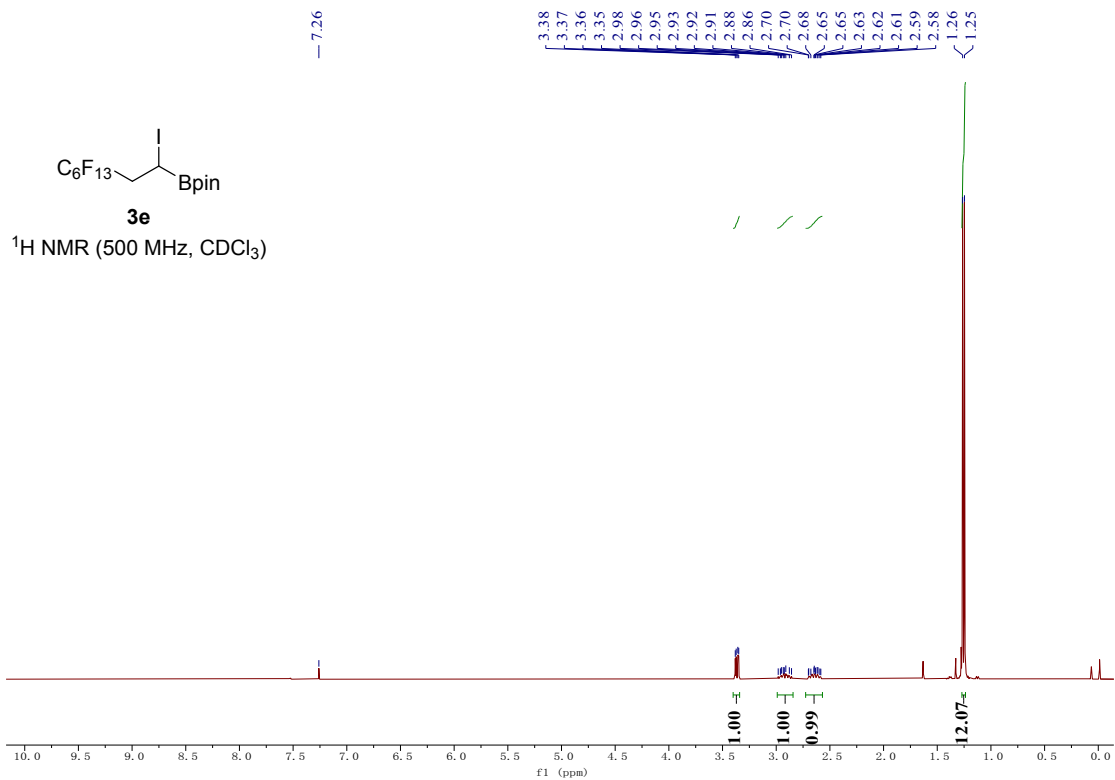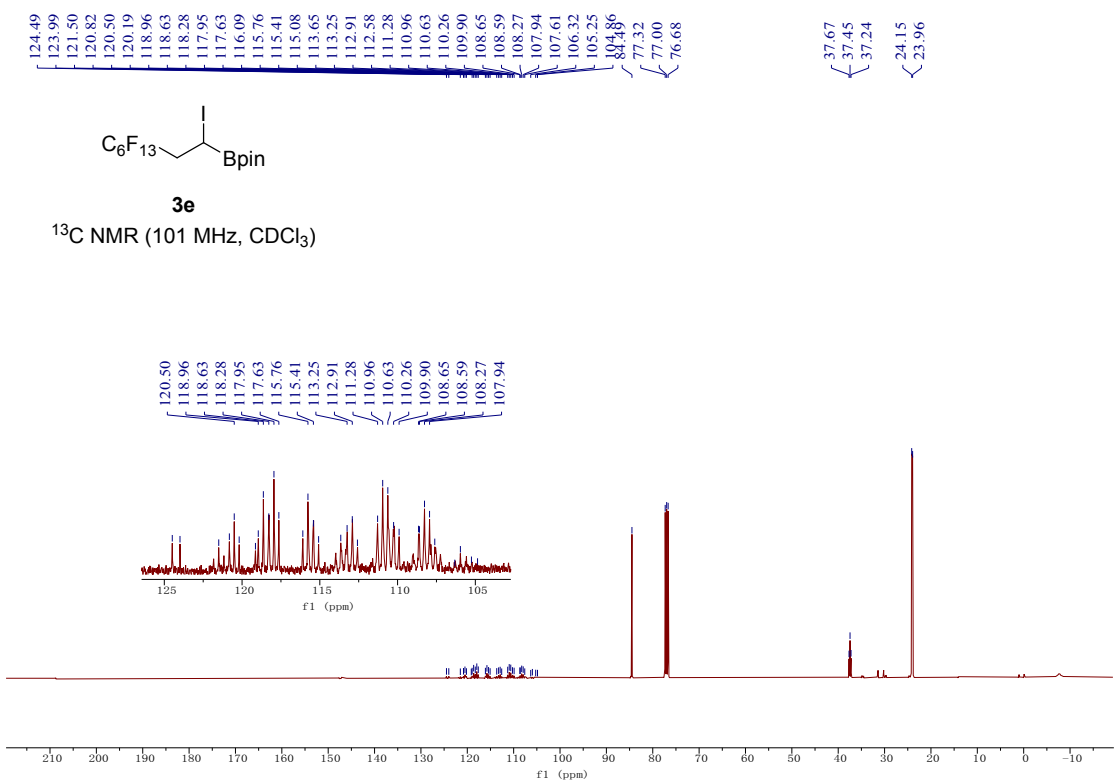

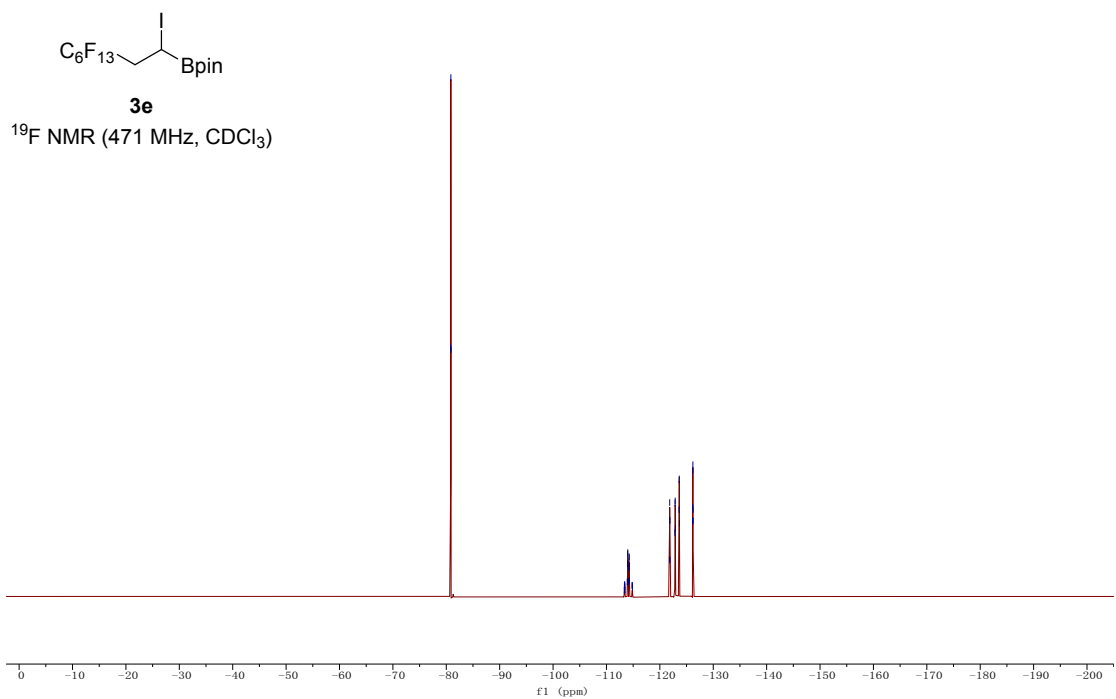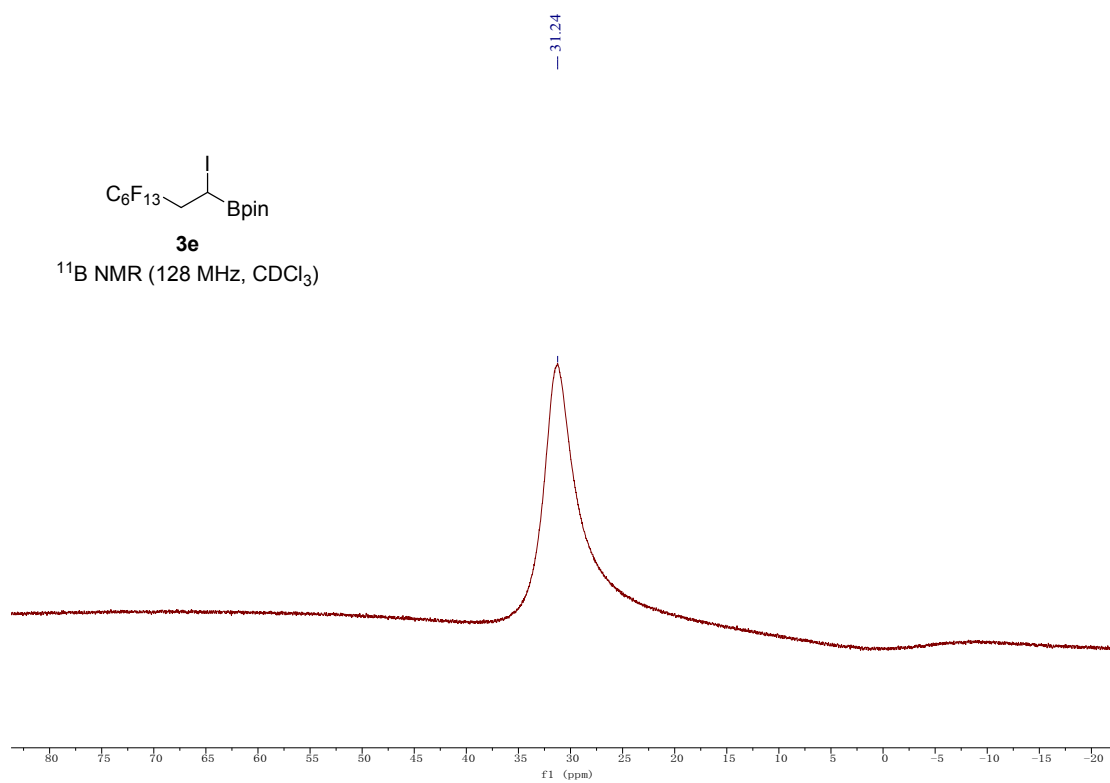

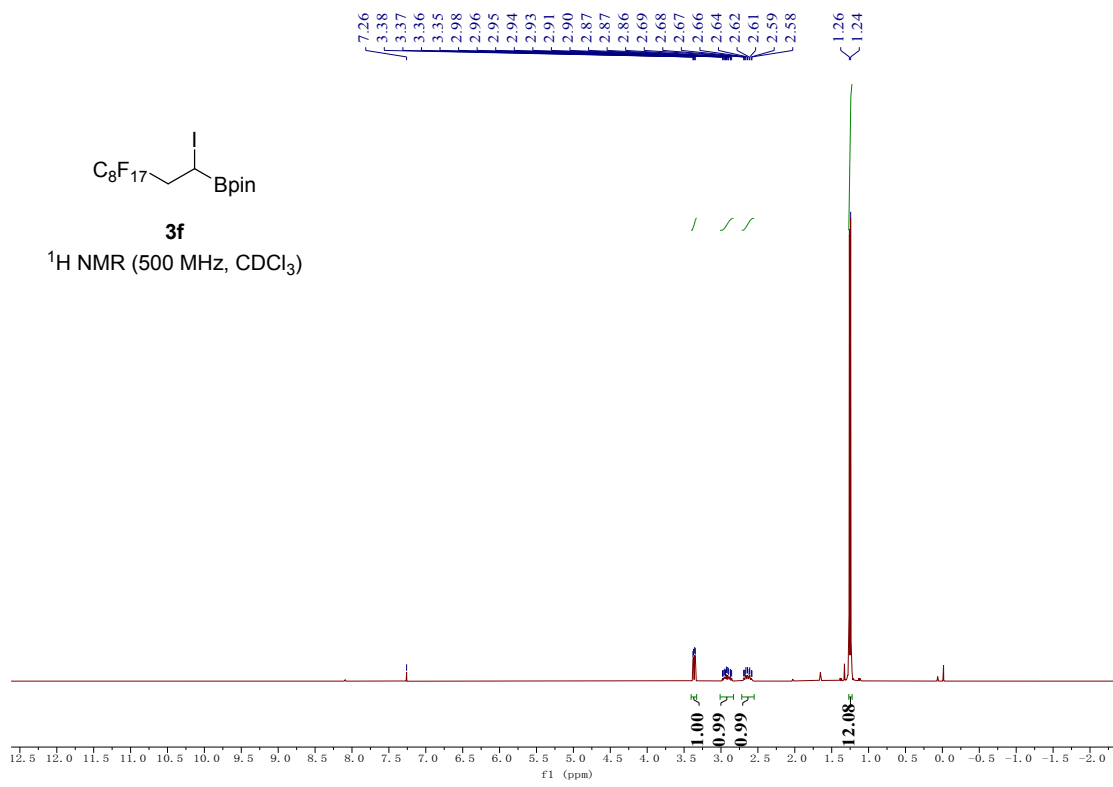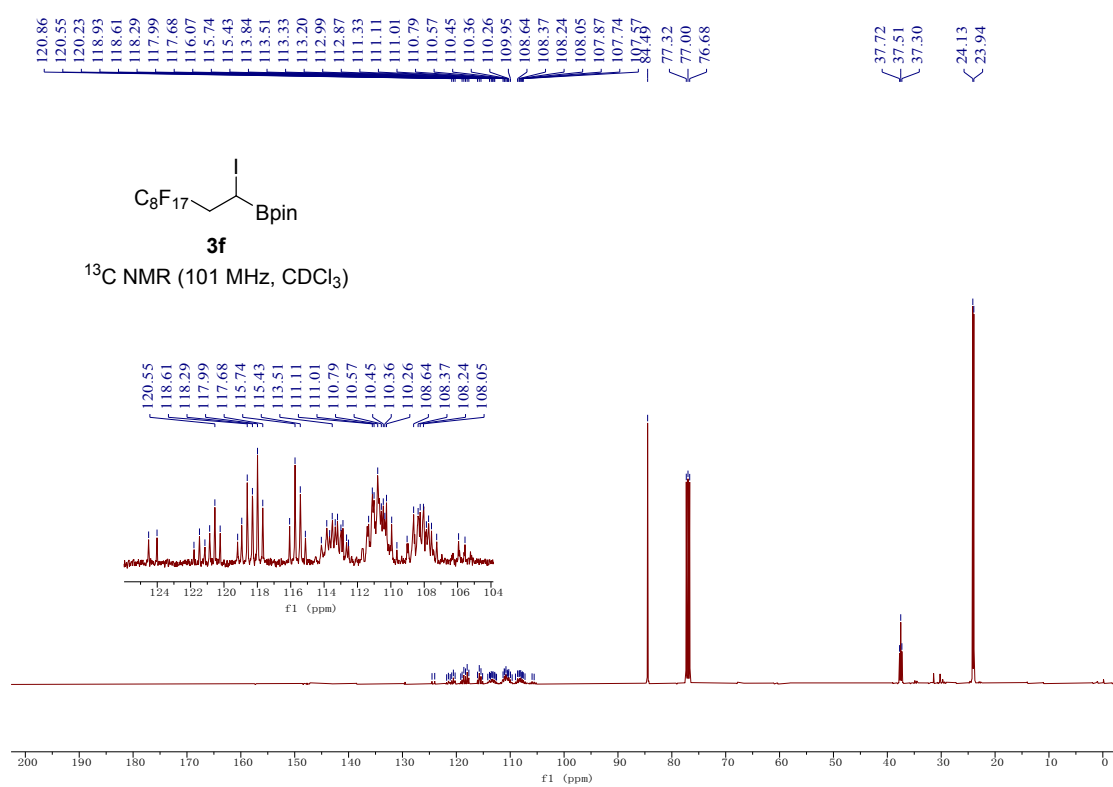

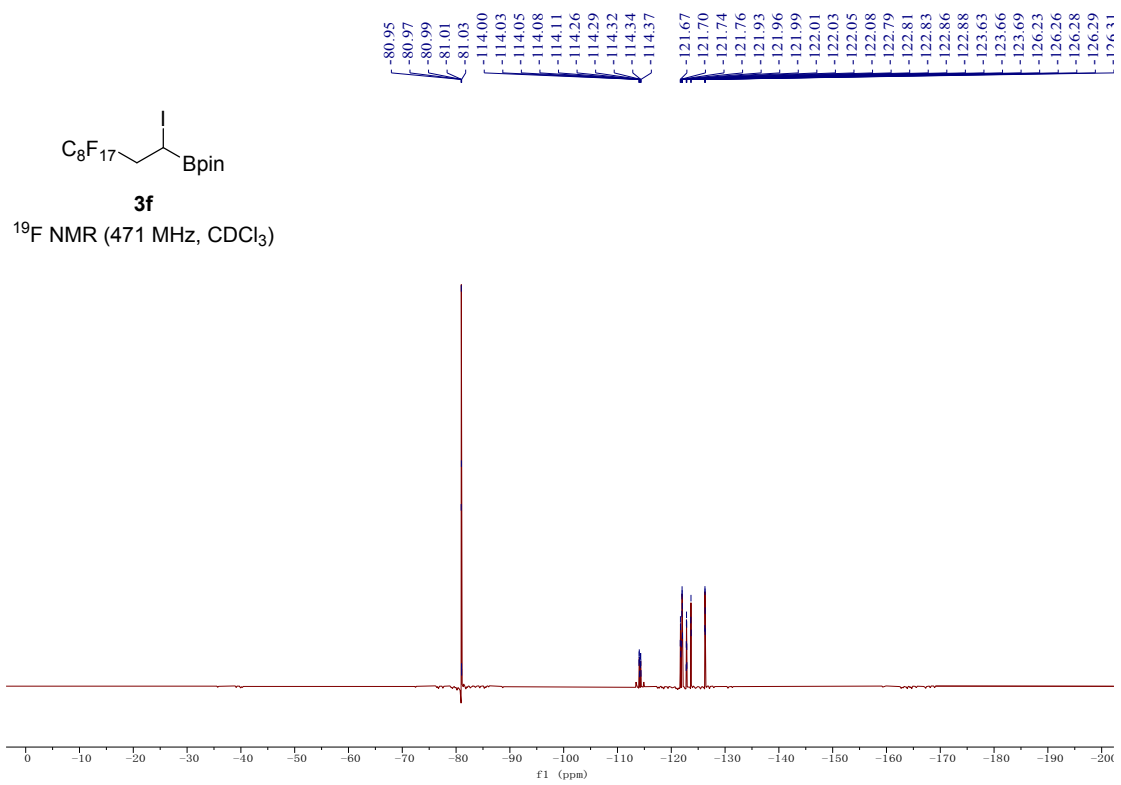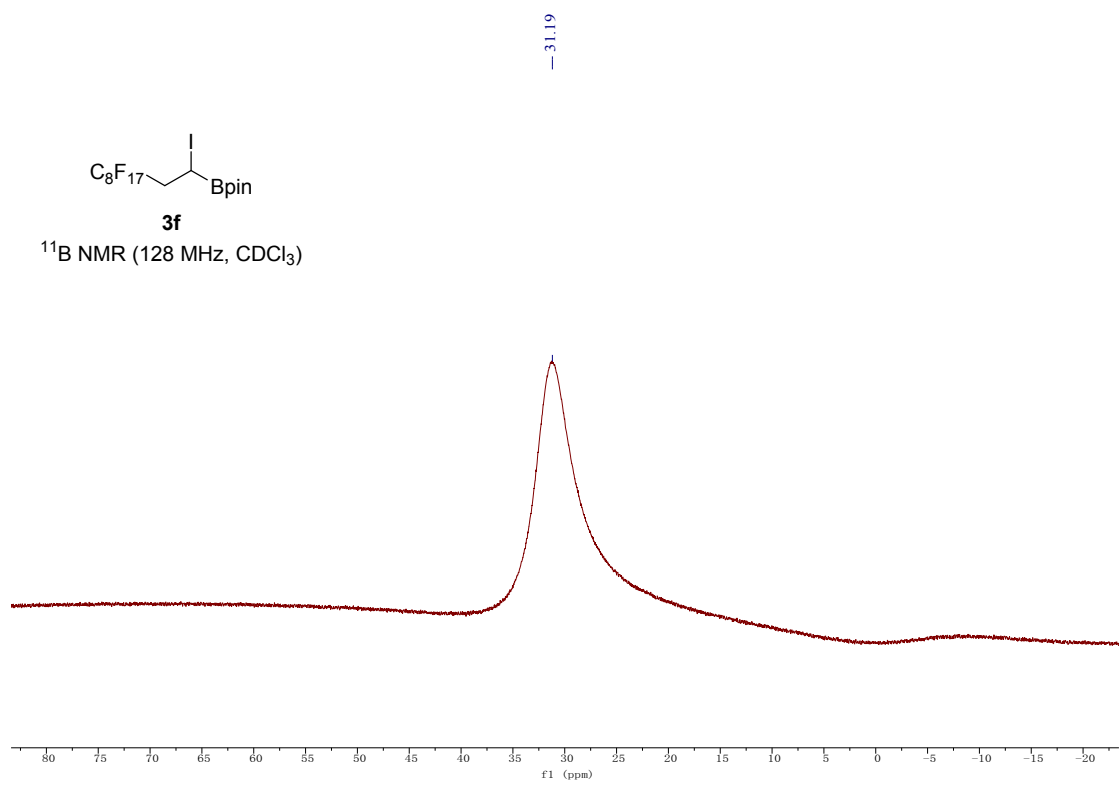

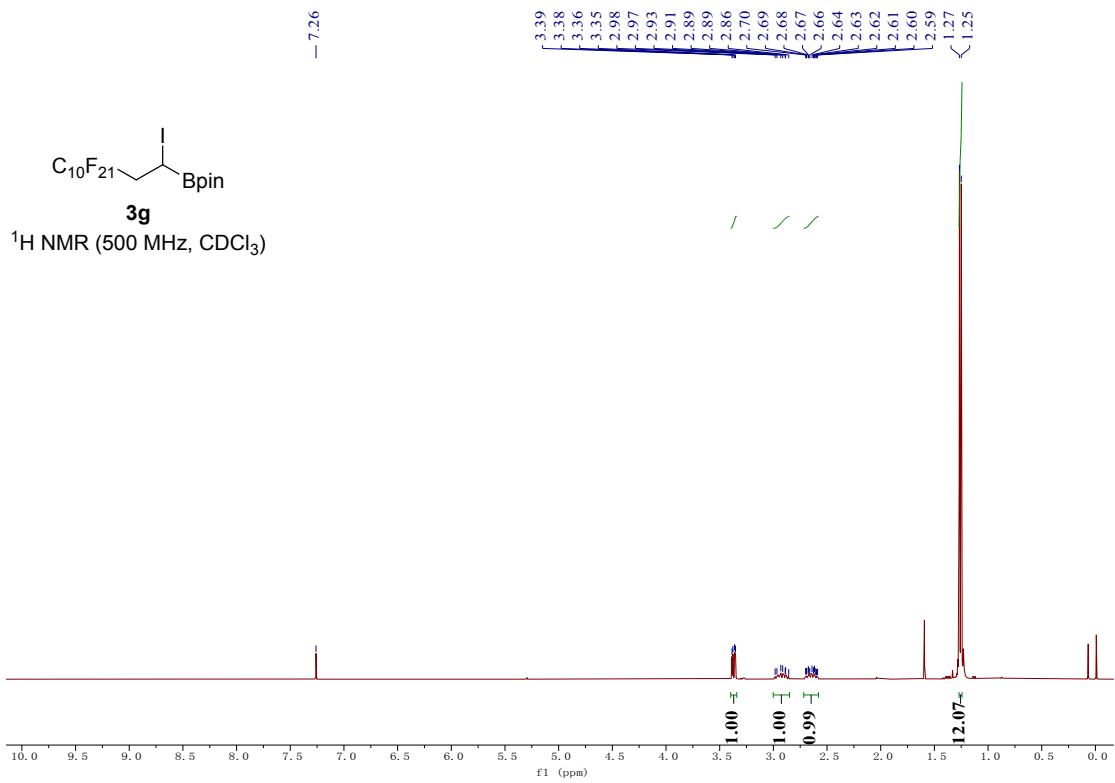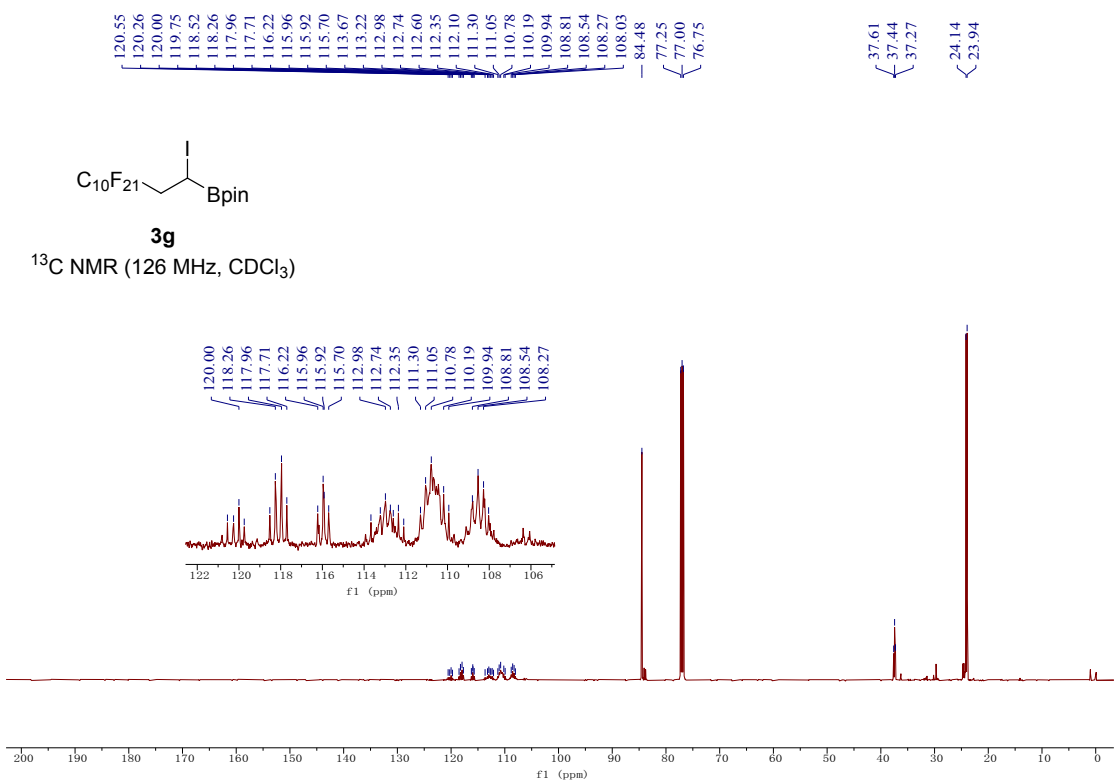

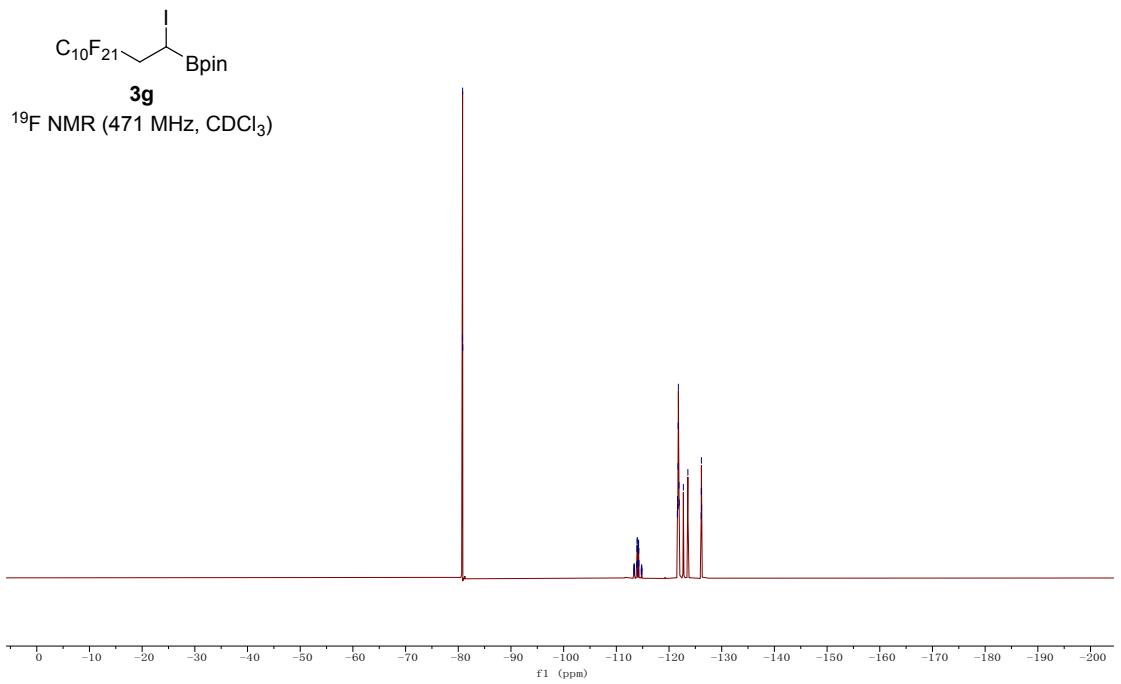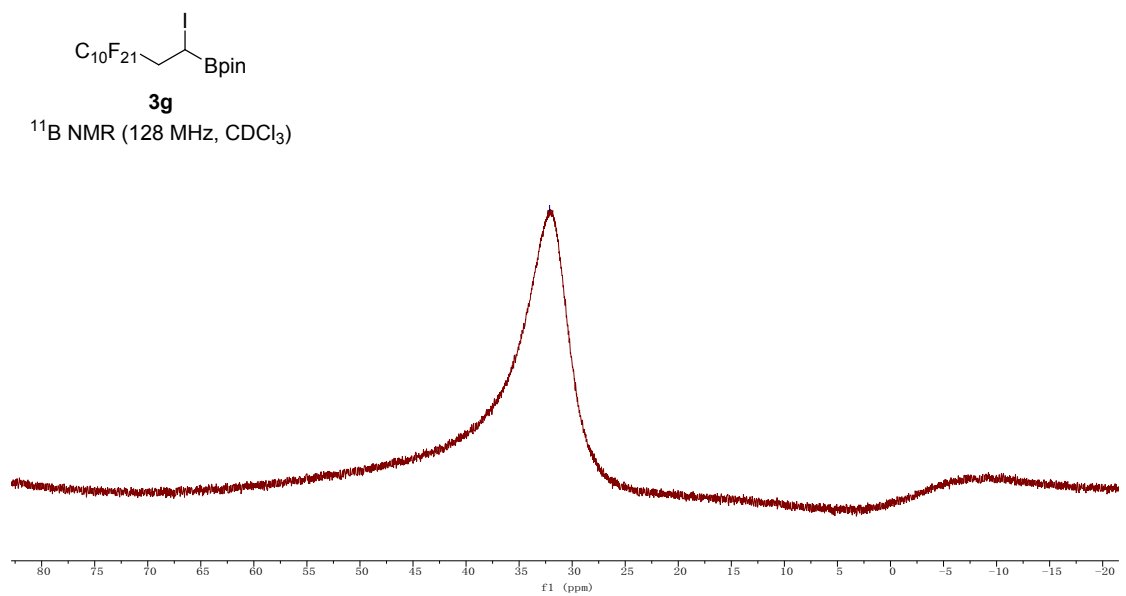

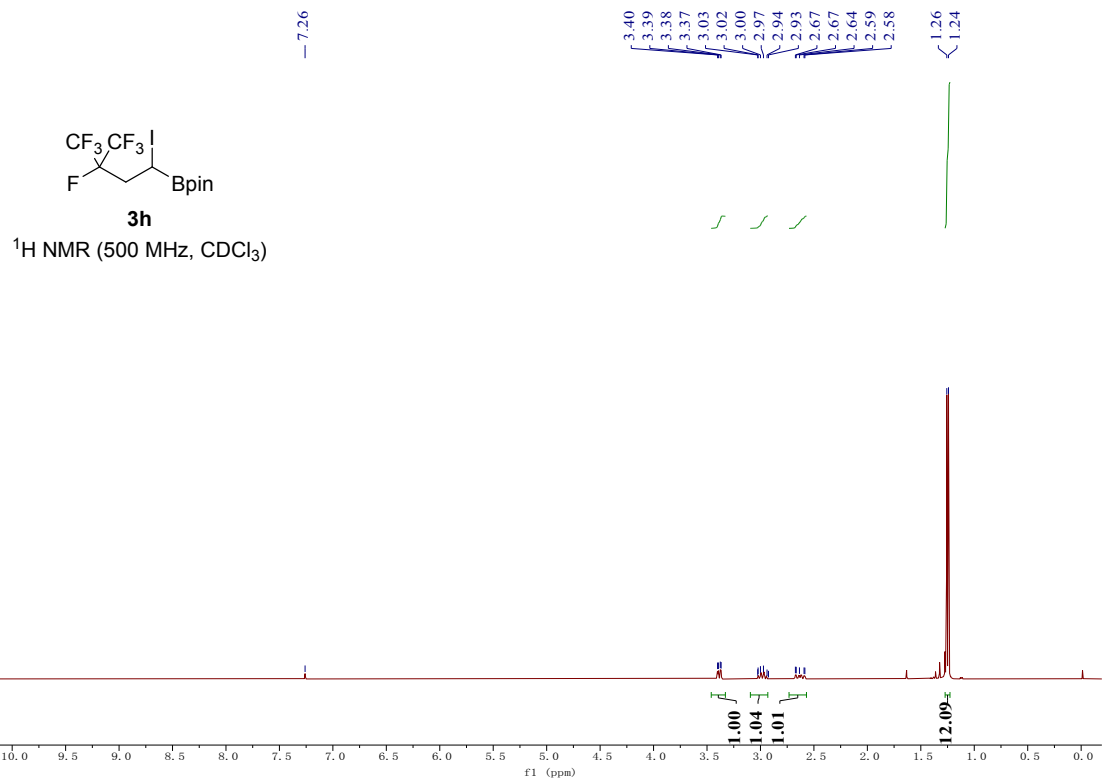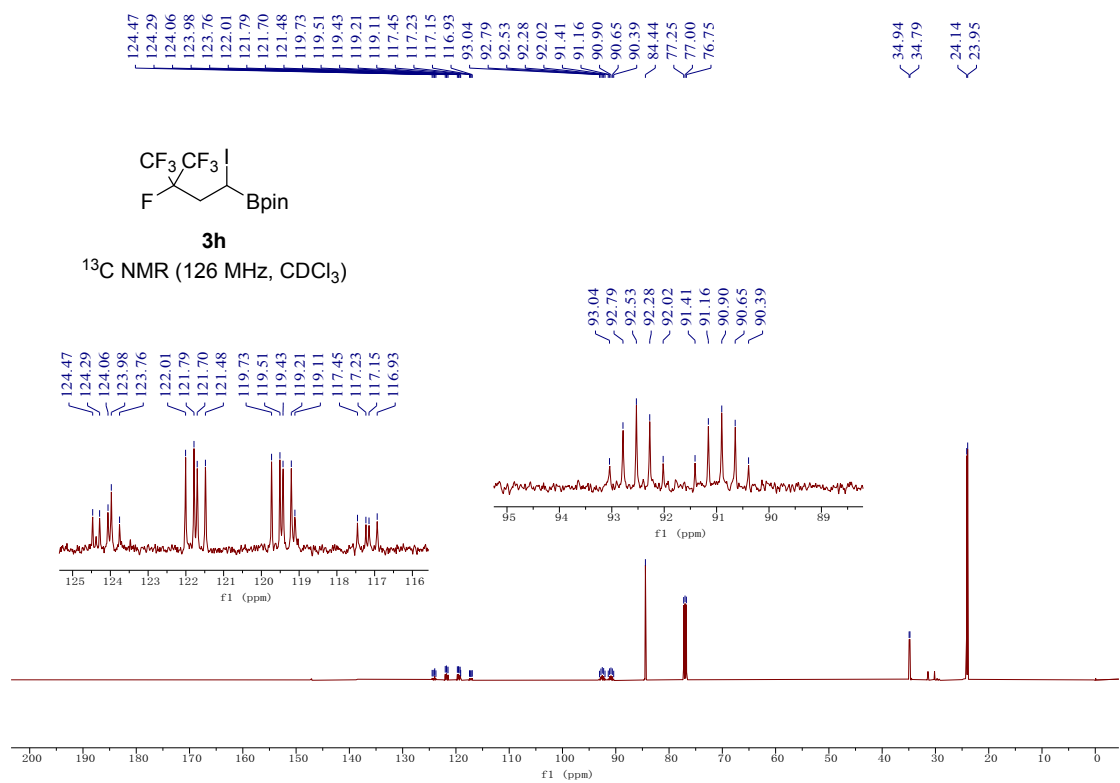

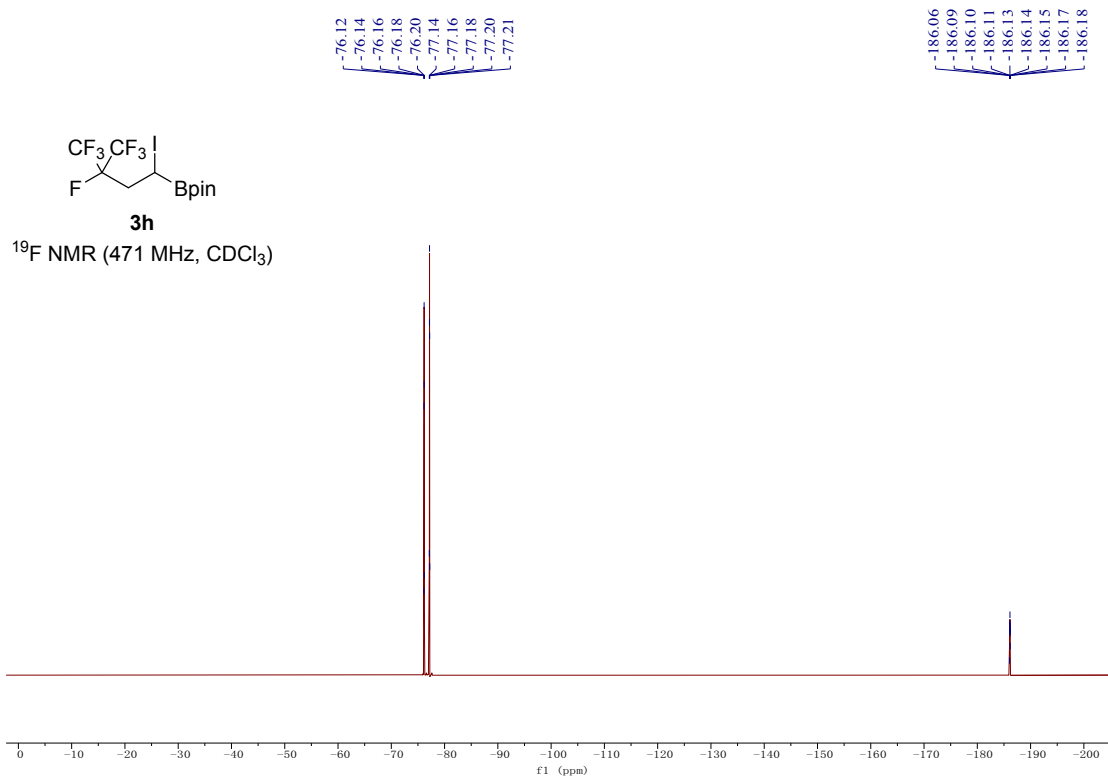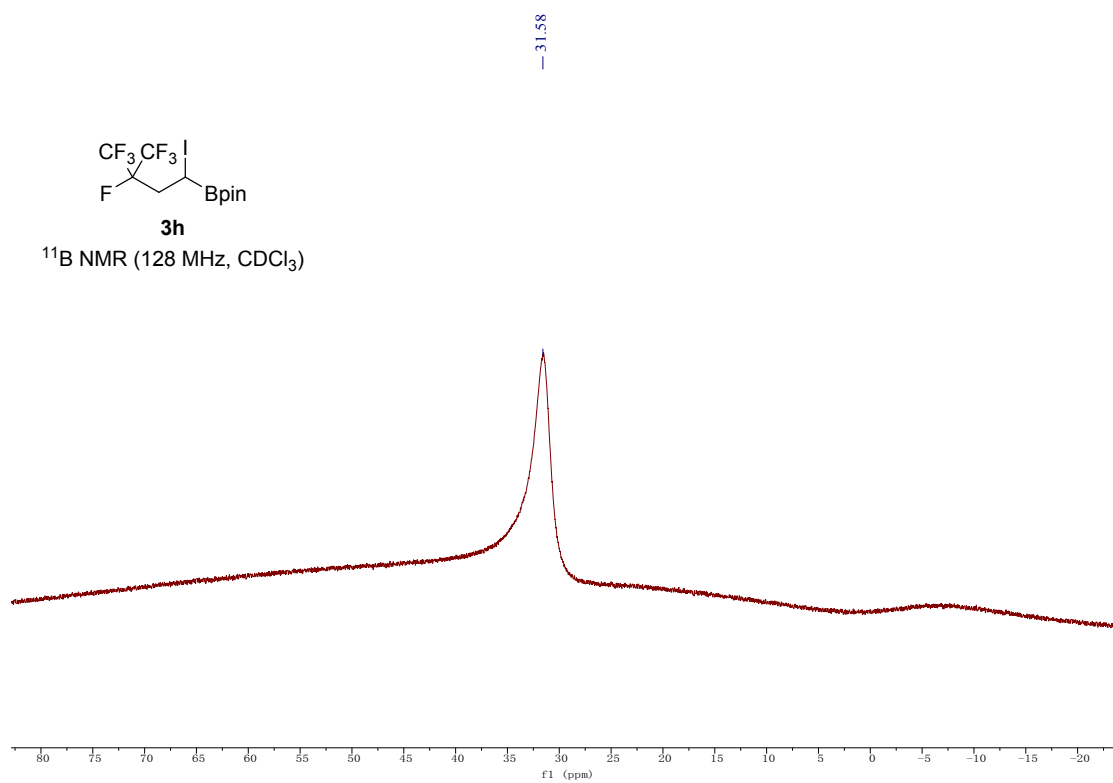



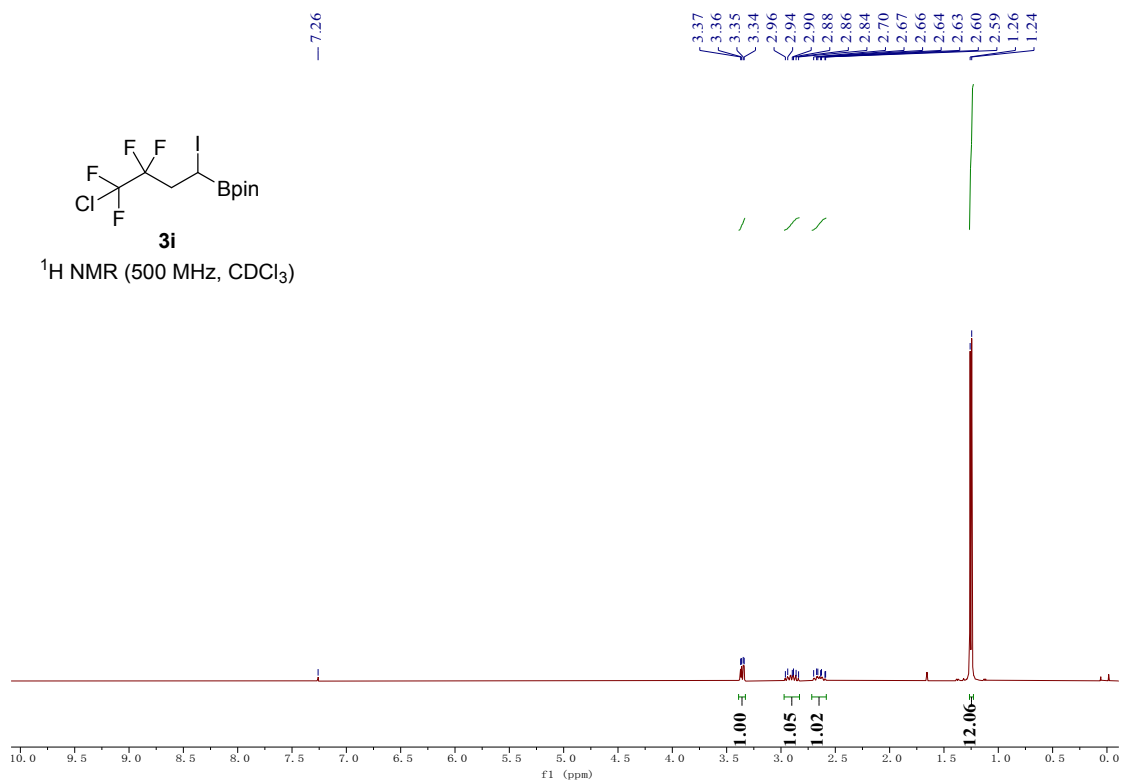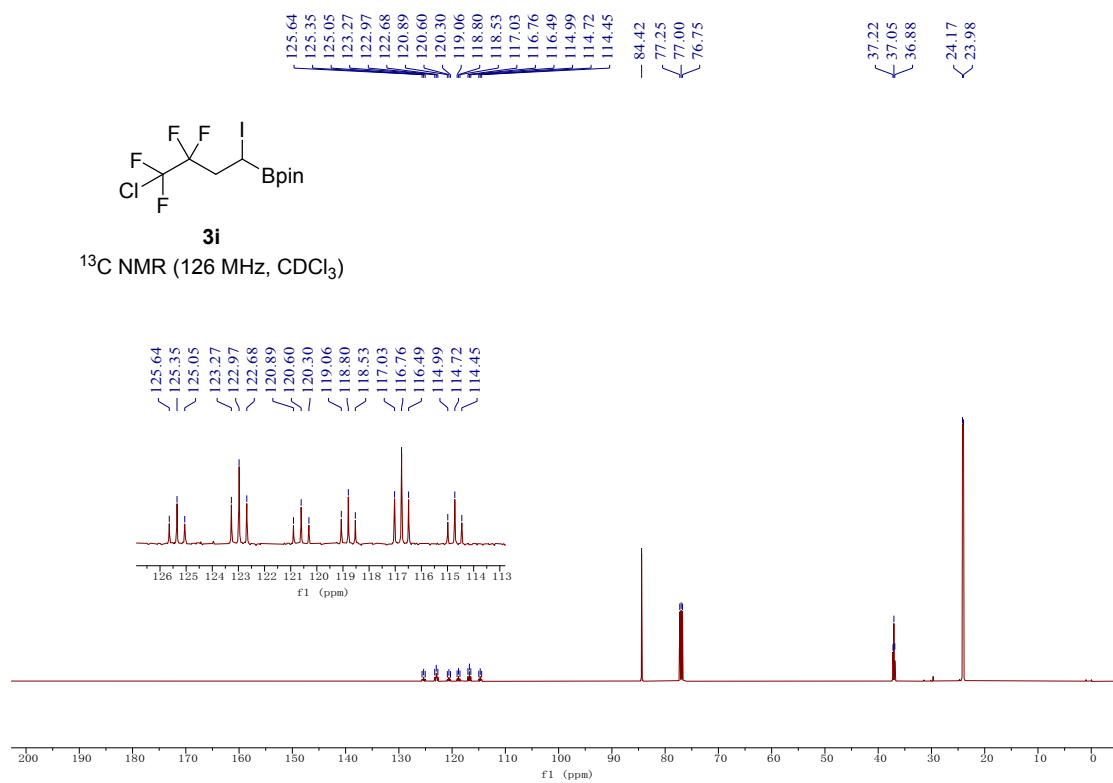

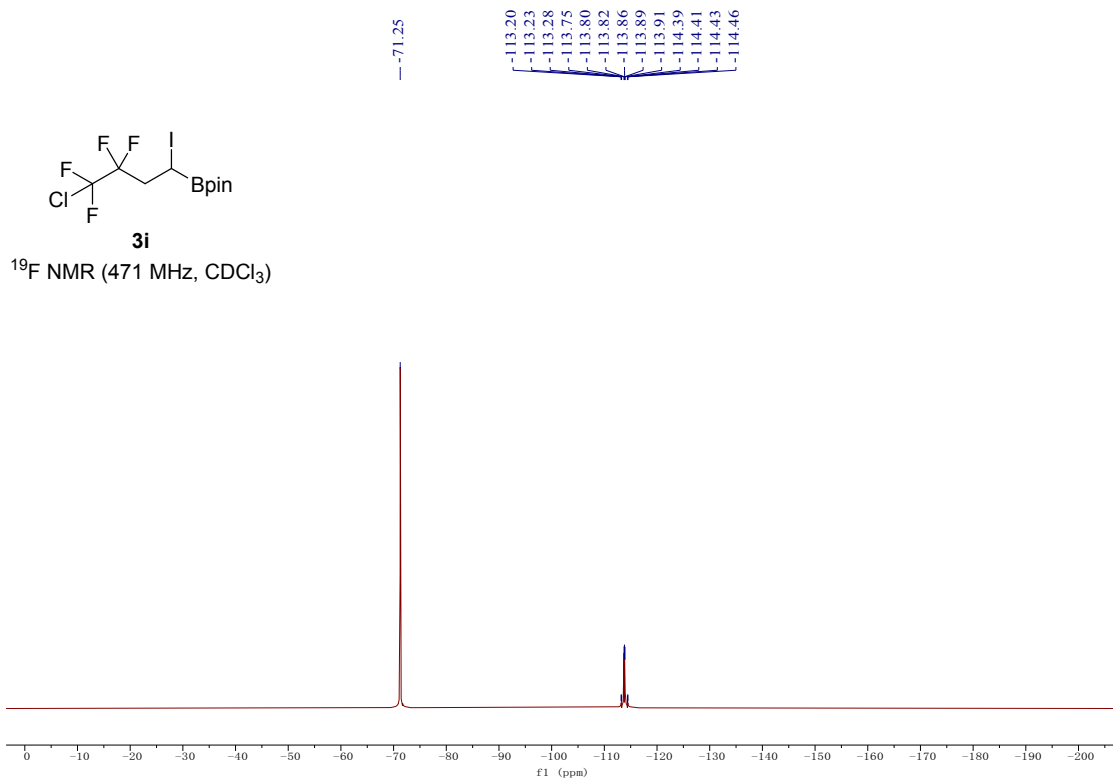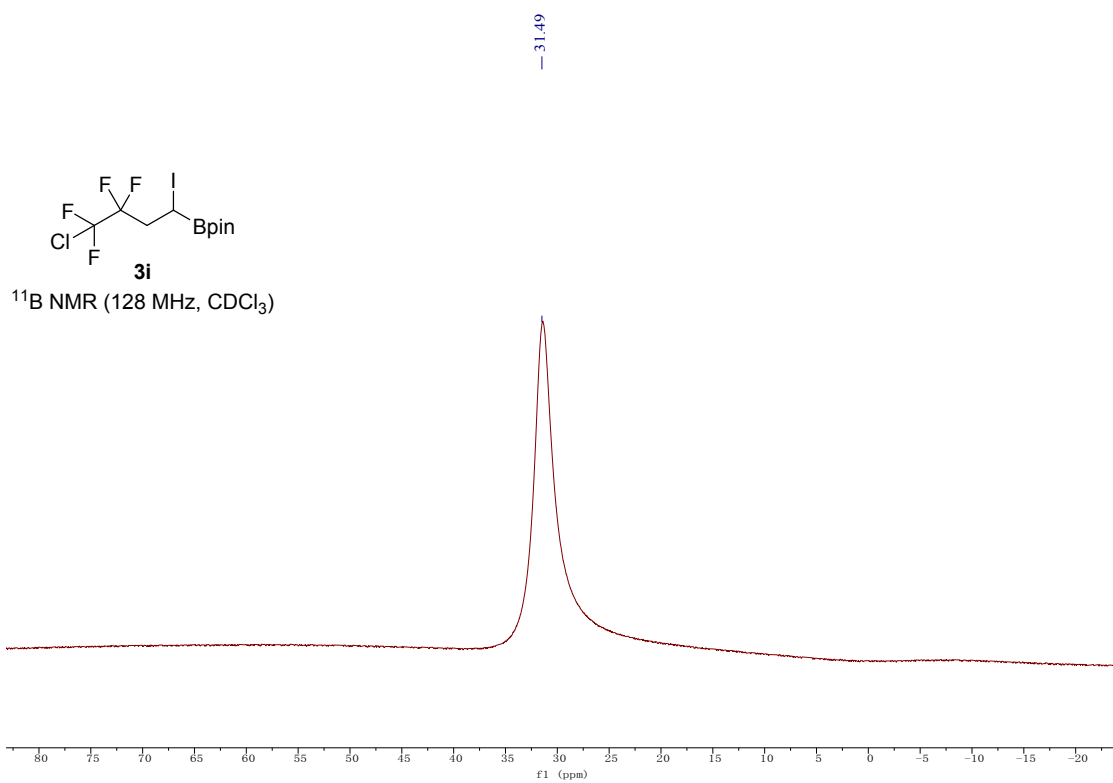

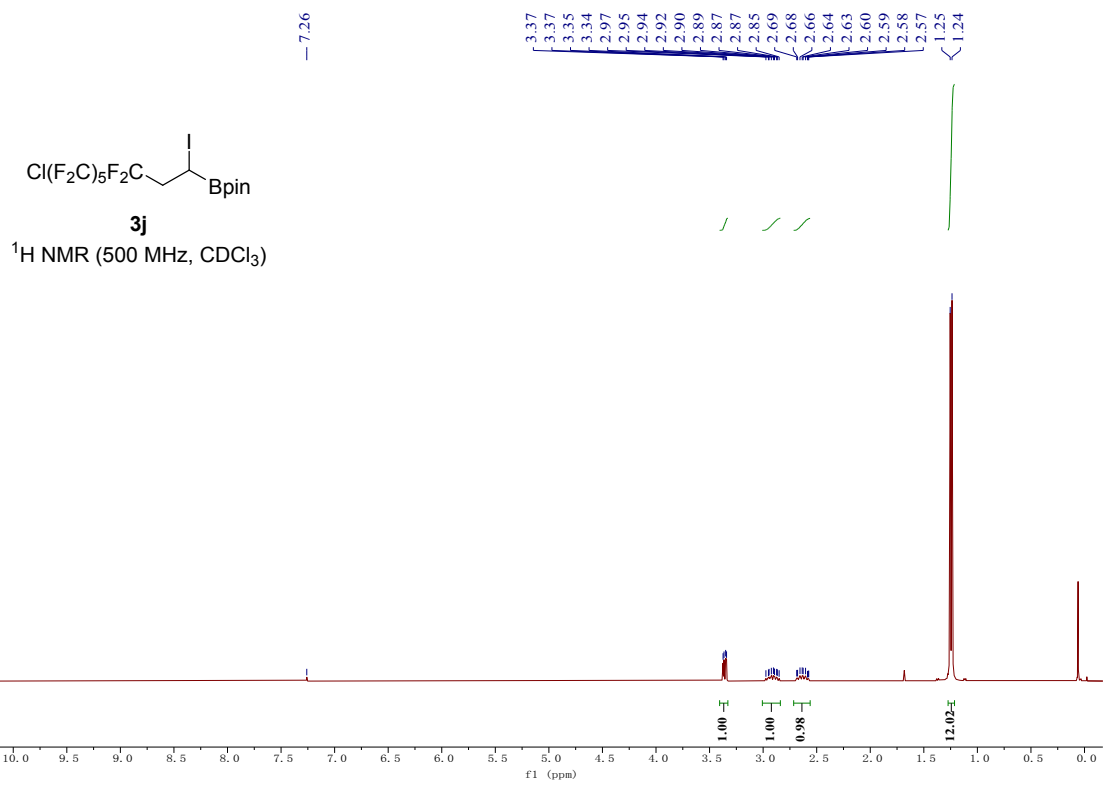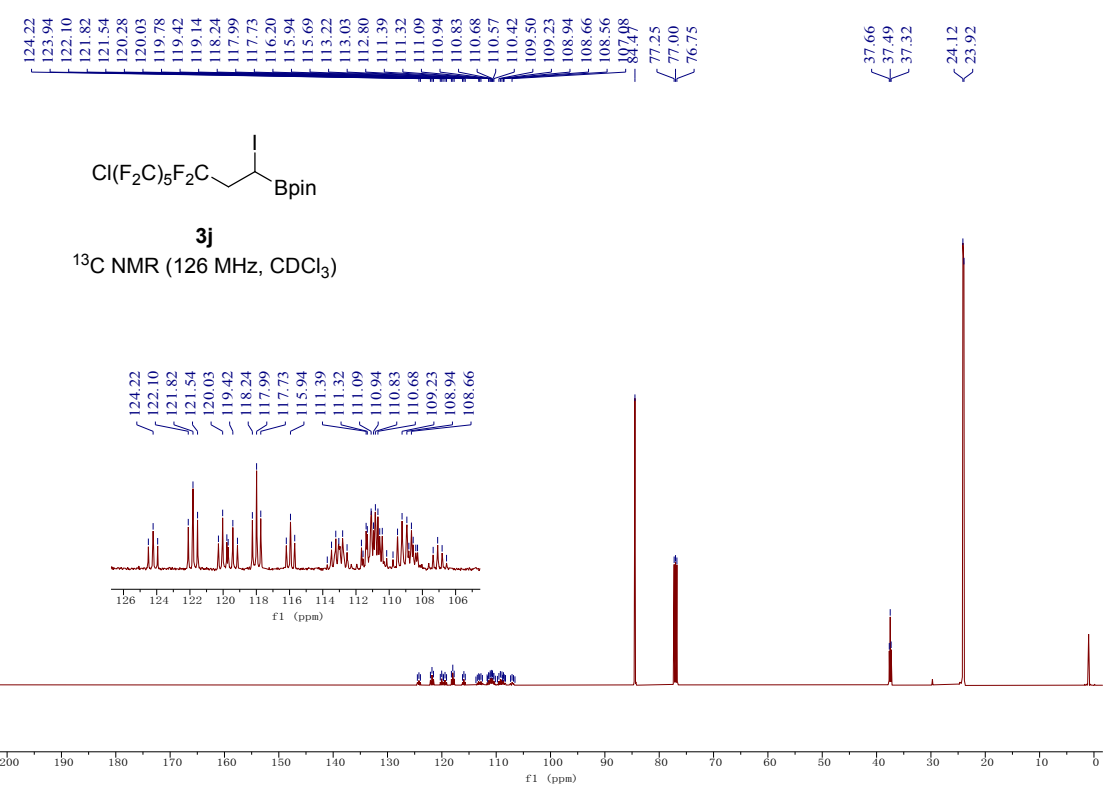

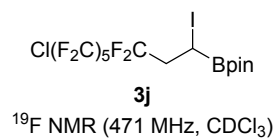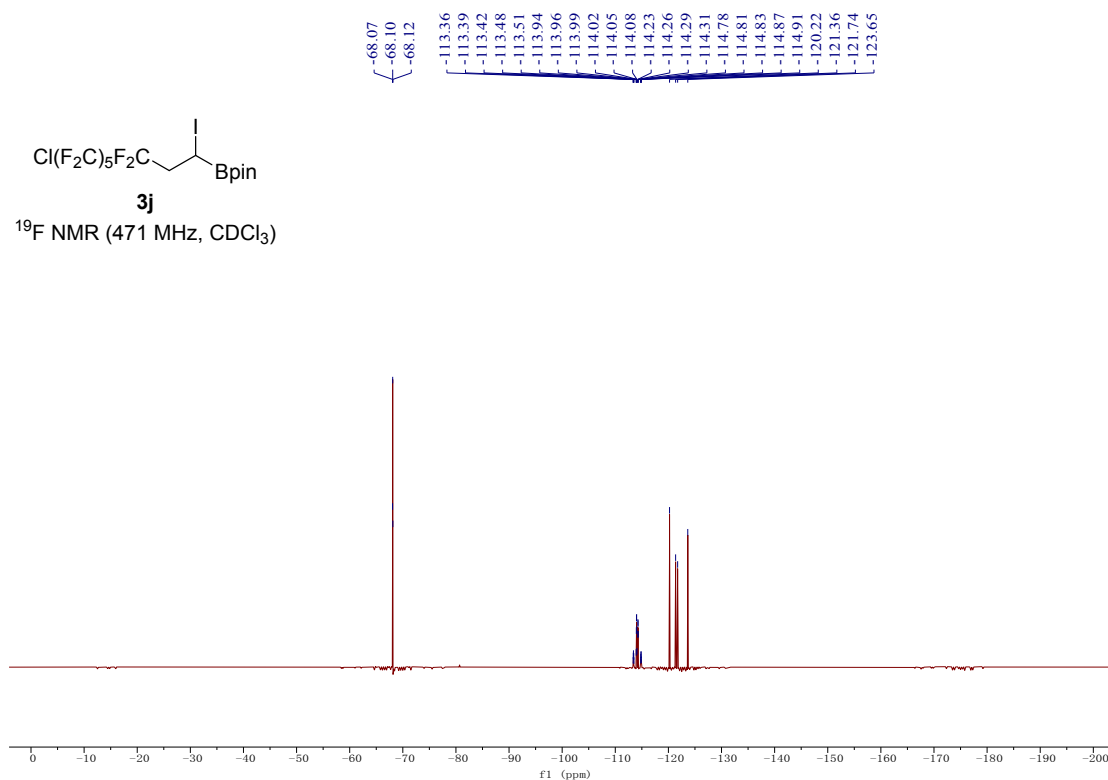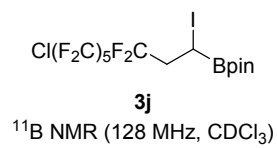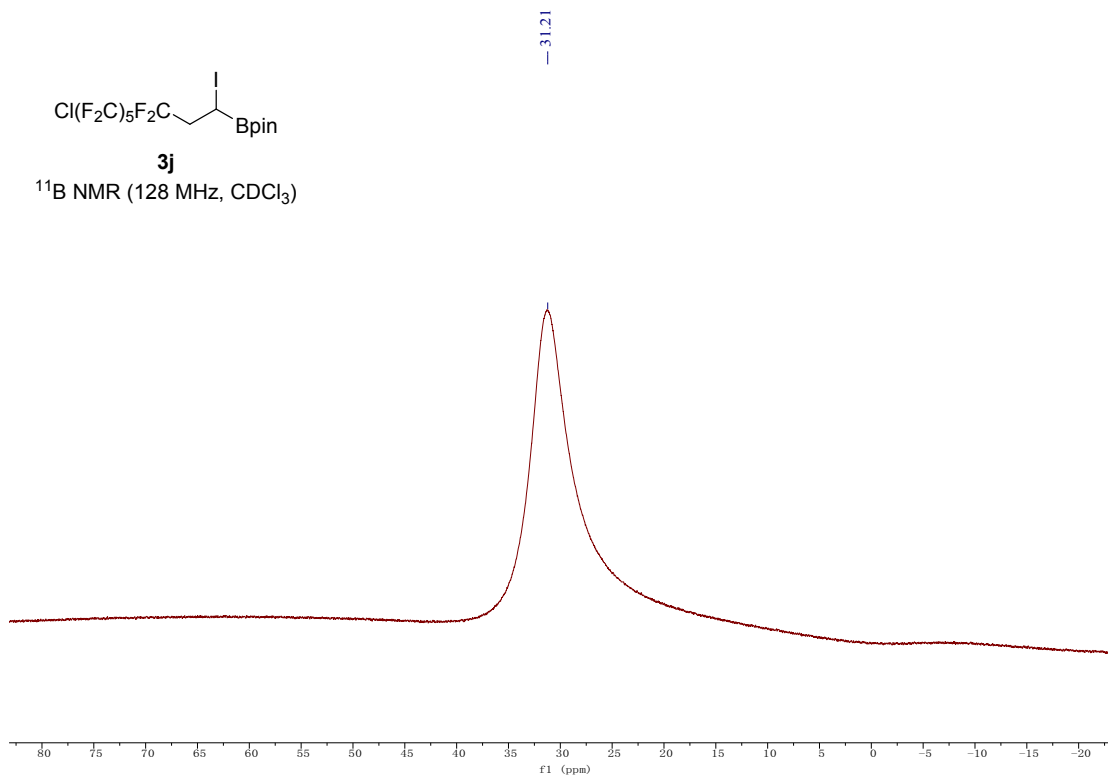

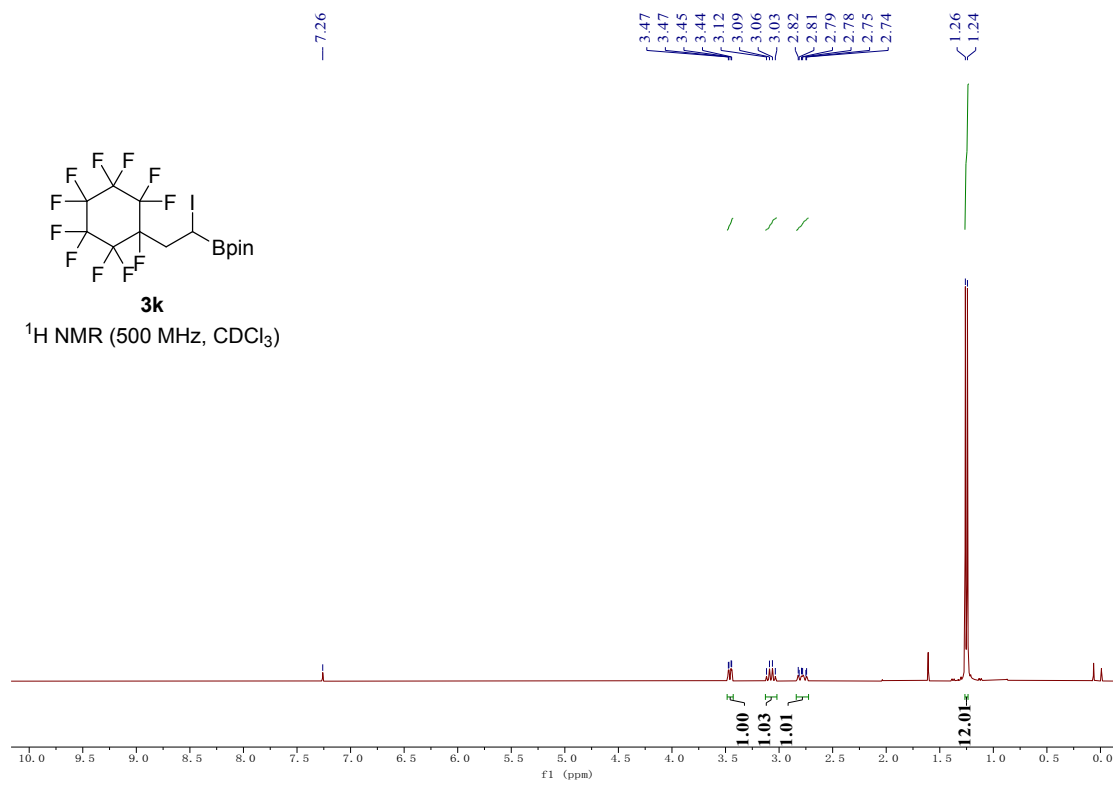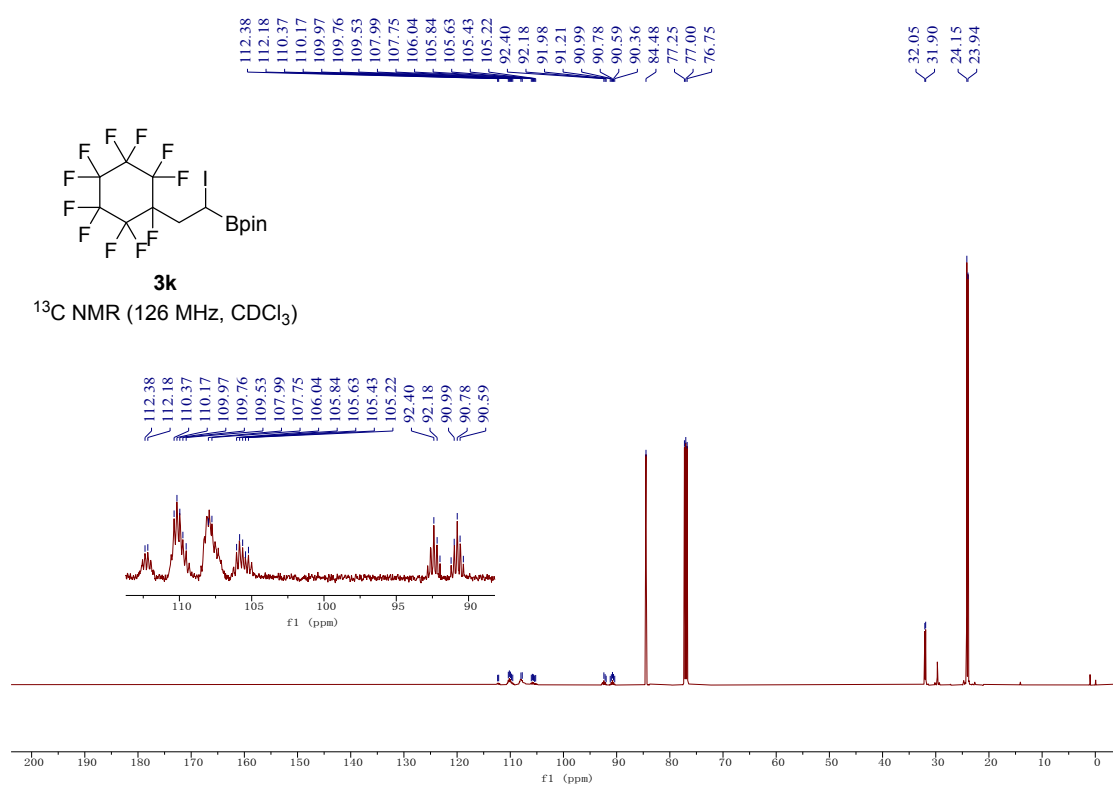

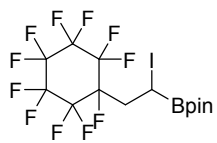

**3k**

$^{19}\text{F}$  NMR (471 MHz,  $\text{CDCl}_3$ )

-117.41  
-118.04  
-118.47  
-119.10  
-122.17  
-122.37  
-122.76  
-122.97  
-123.61  
-124.22  
-131.84  
-132.46  
-132.69  
-133.32  
-138.97  
-139.57  
-141.81  
-142.42

-185.57

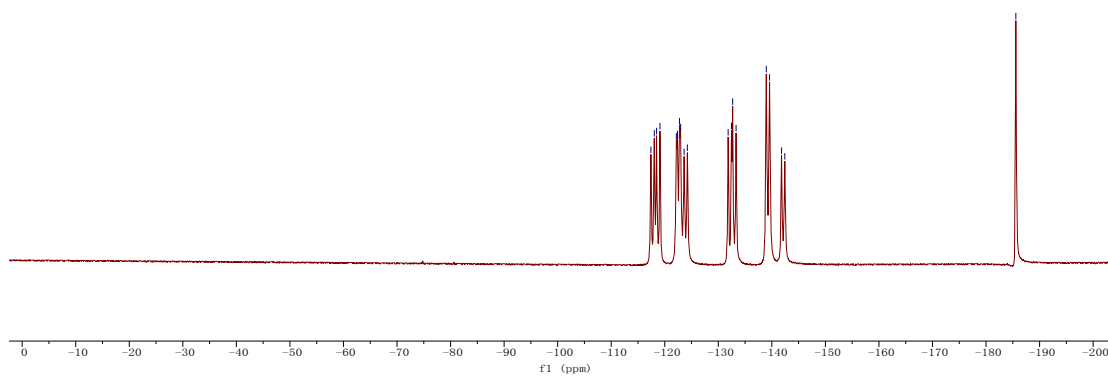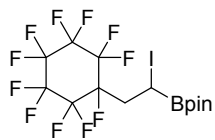

**3k**

$^{11}\text{B}$  NMR (128 MHz,  $\text{CDCl}_3$ )

-31.13

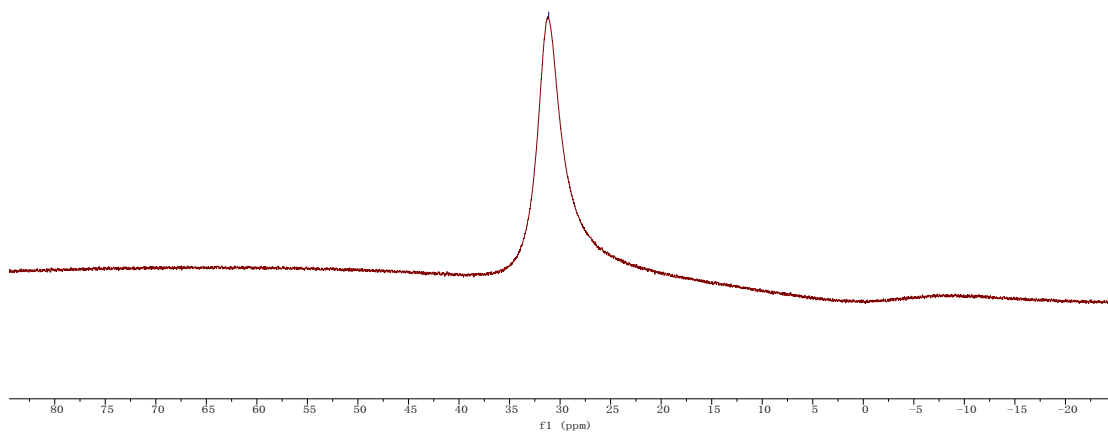

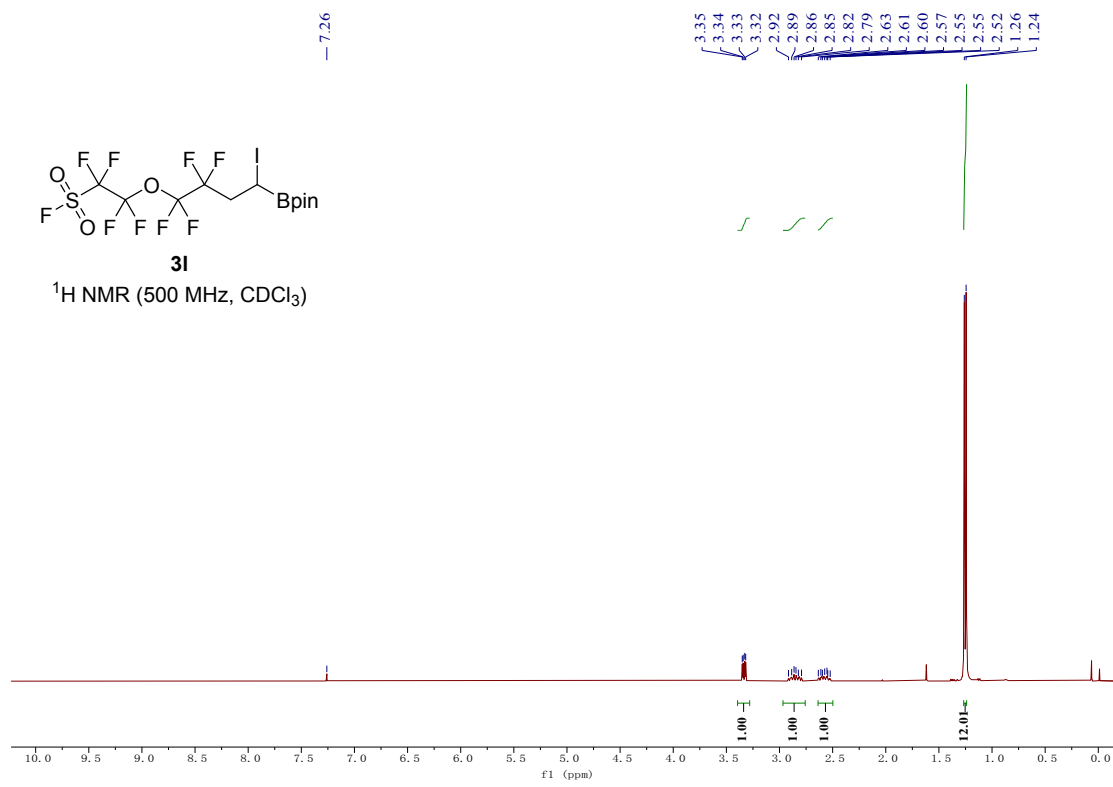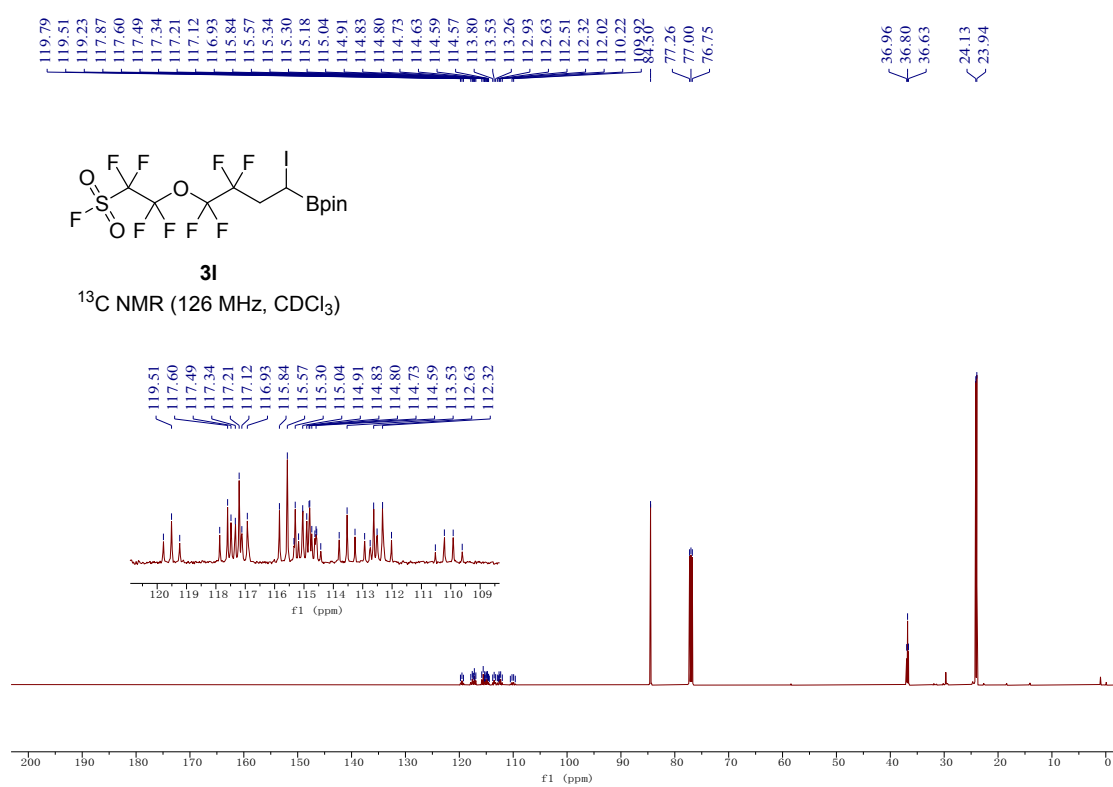

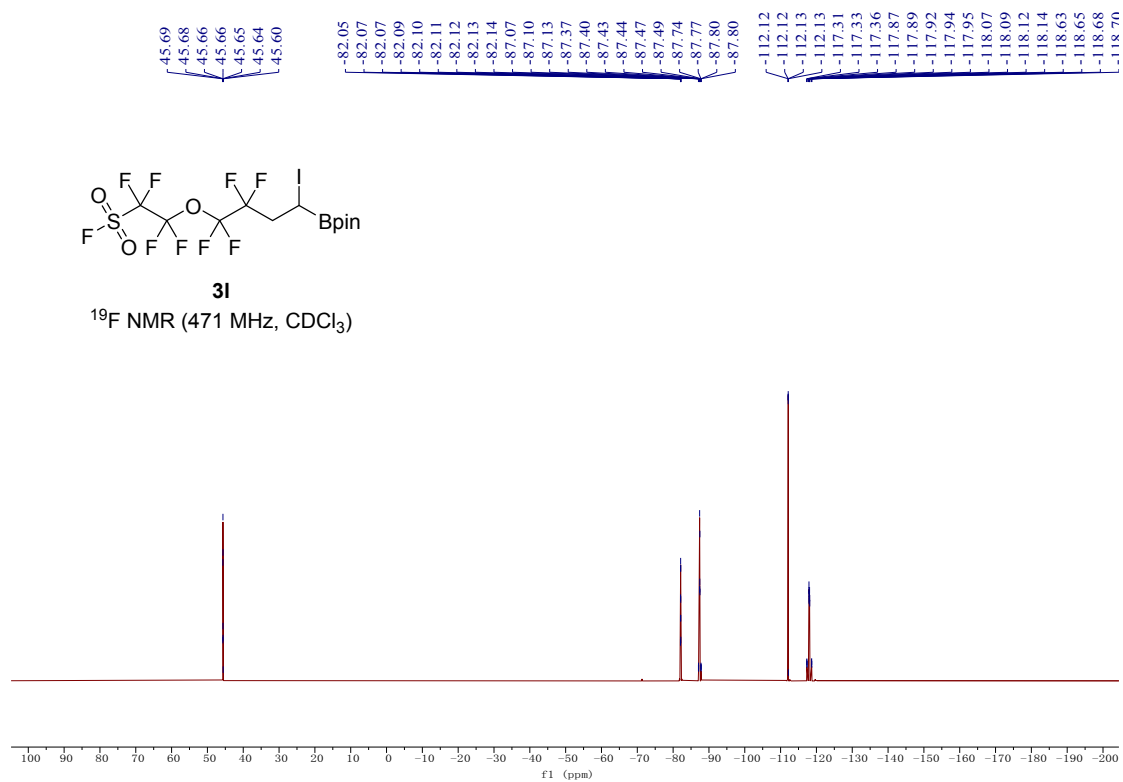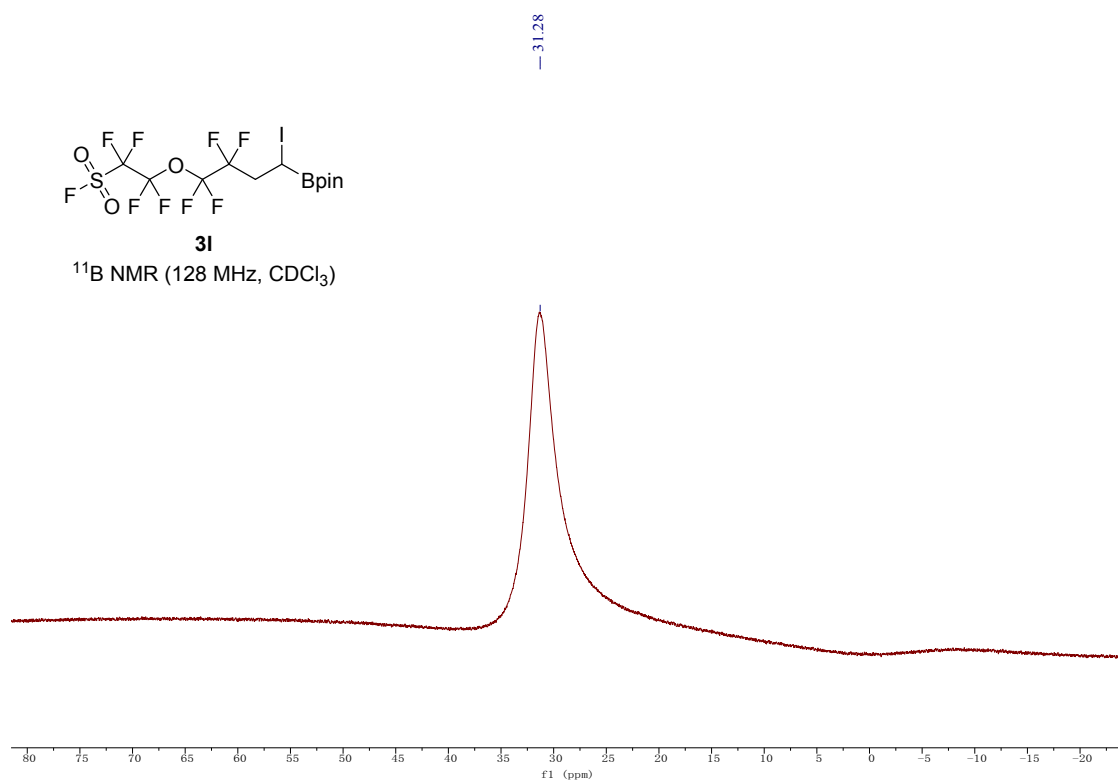



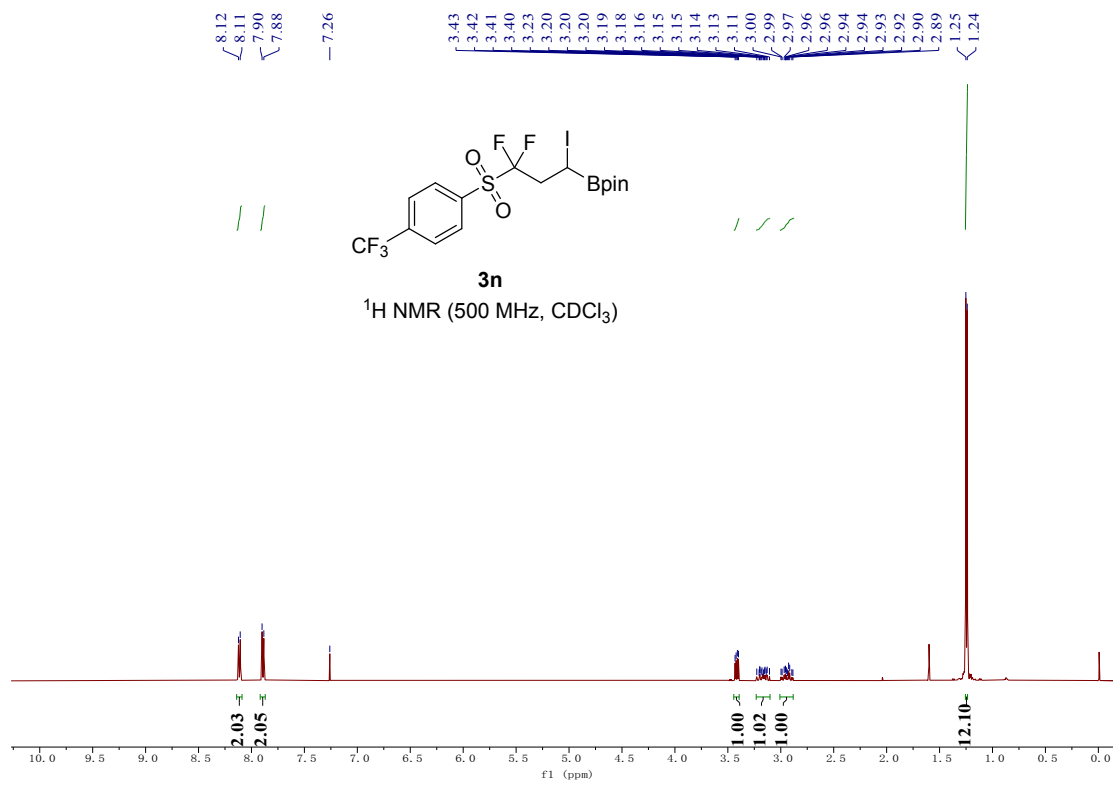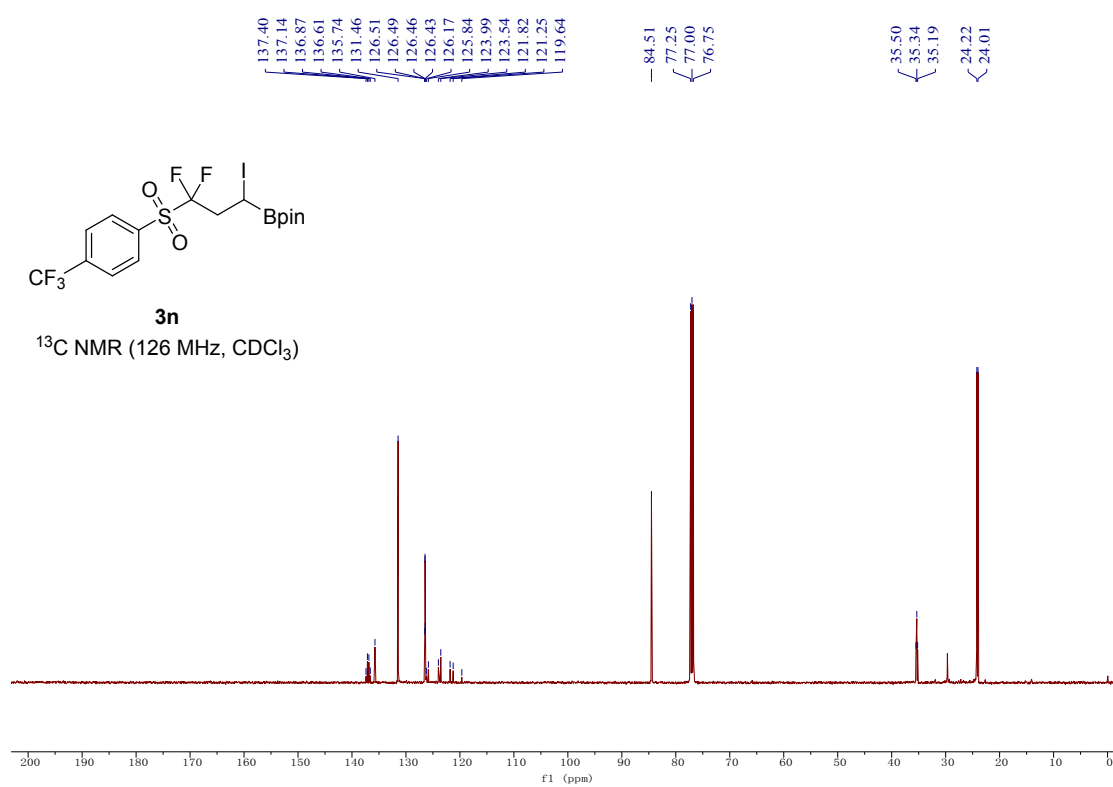

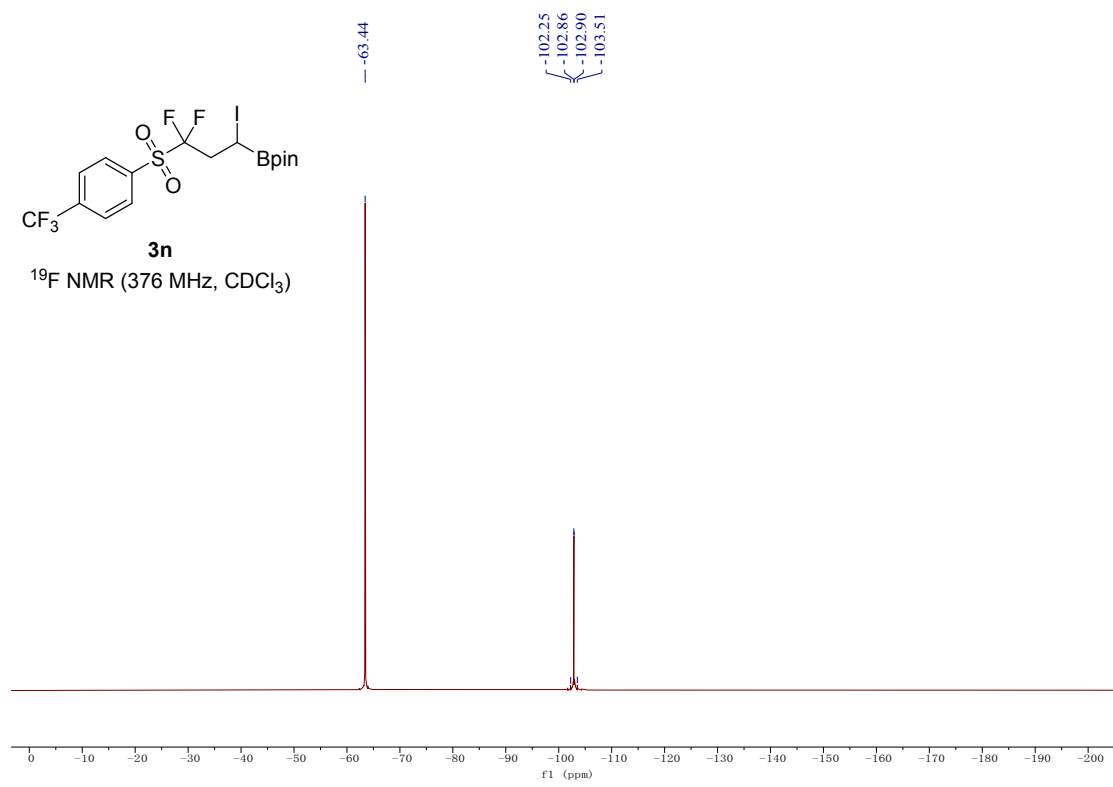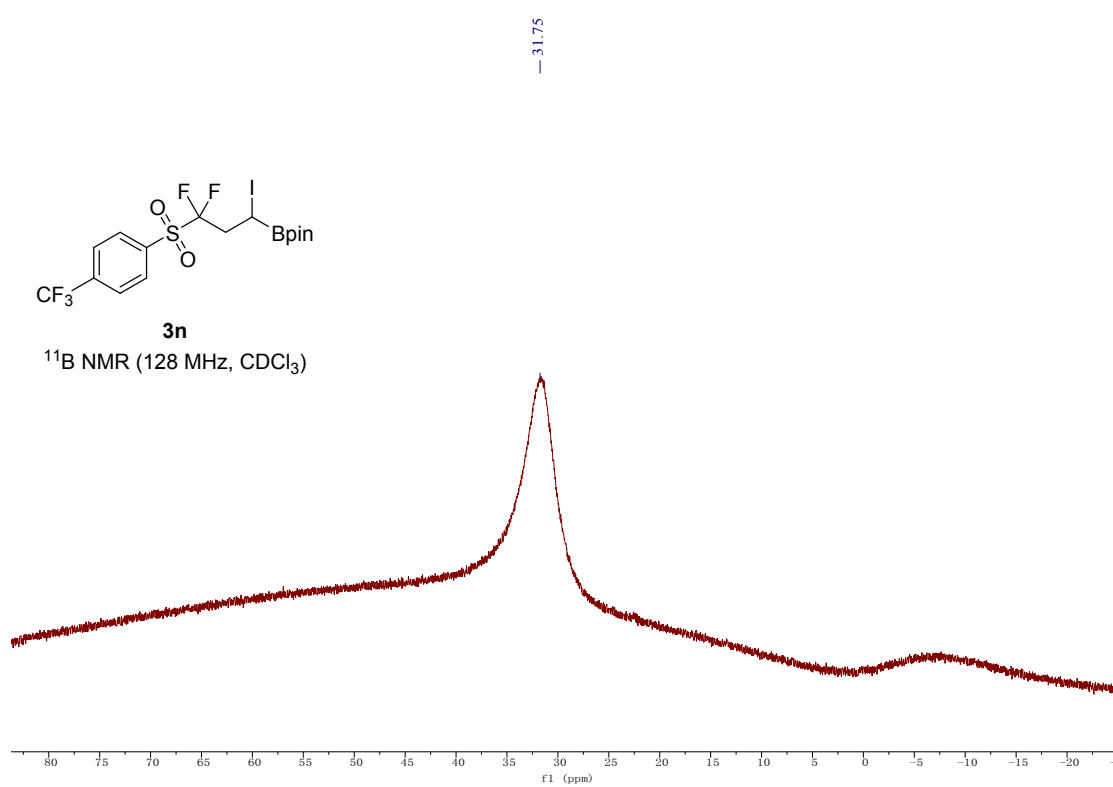

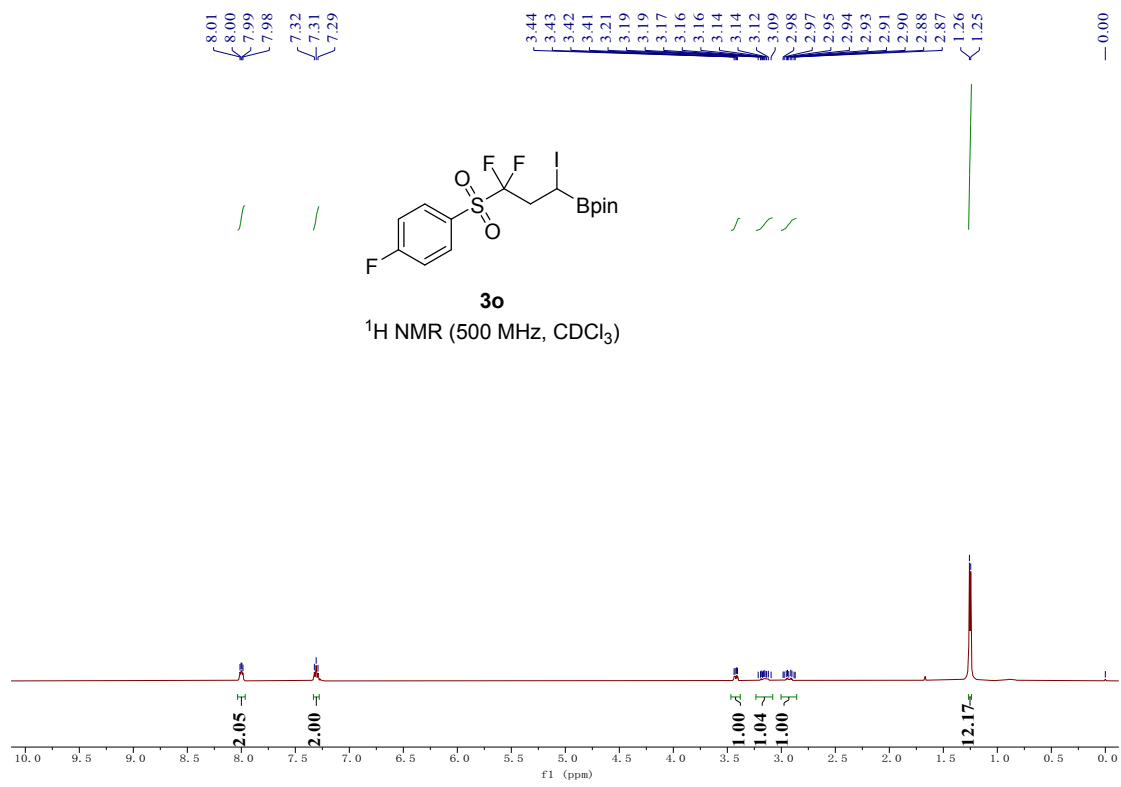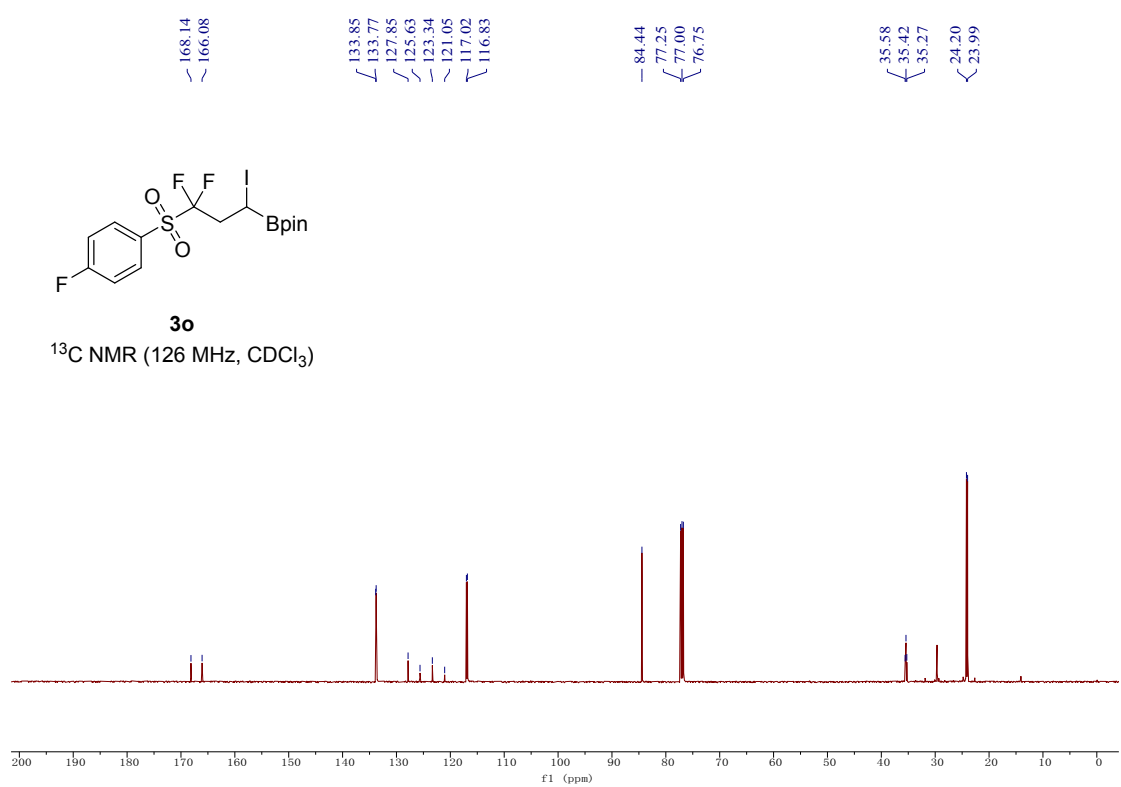

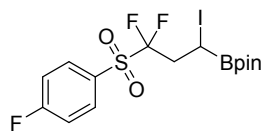

**3o**

$^{19}\text{F}$  NMR (376 MHz,  $\text{CDCl}_3$ )

-99.96  
-102.79  
-103.40  
-103.44  
-104.05

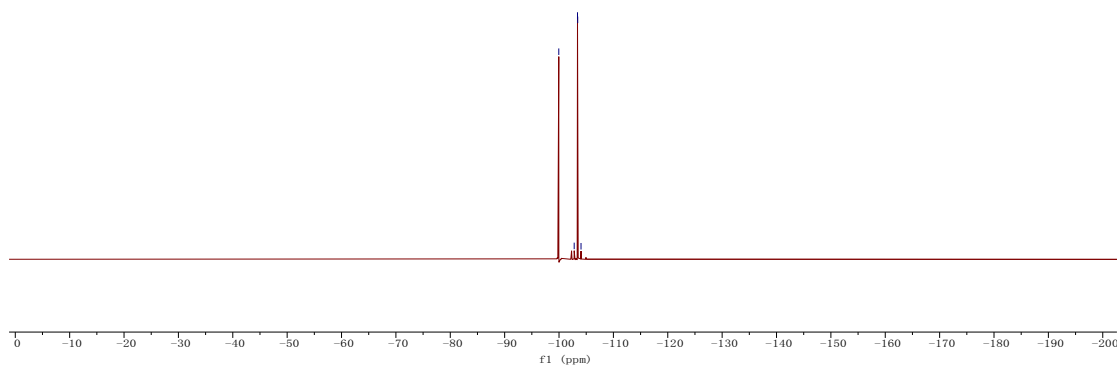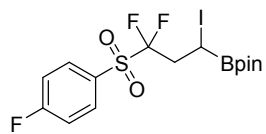

**3o**

$^{11}\text{B}$  NMR (128 MHz,  $\text{CDCl}_3$ )

-31.15

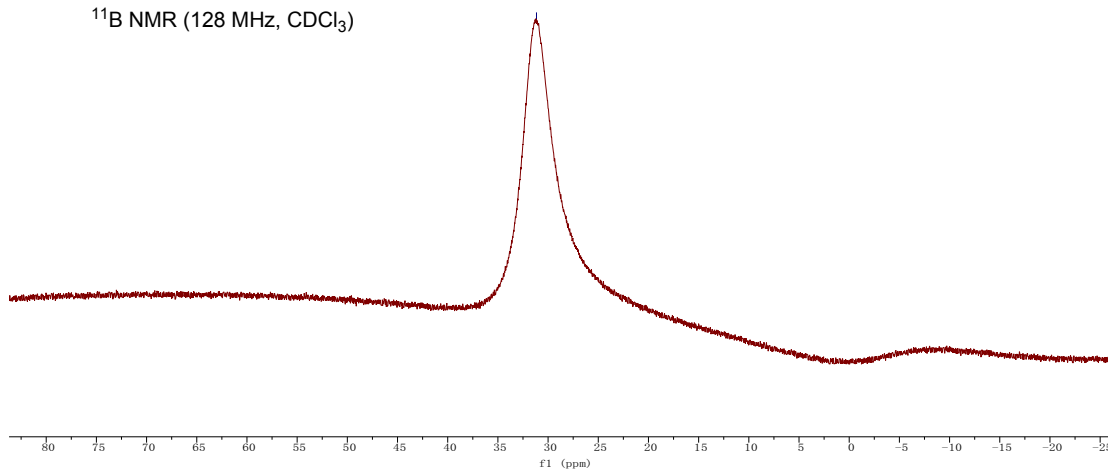

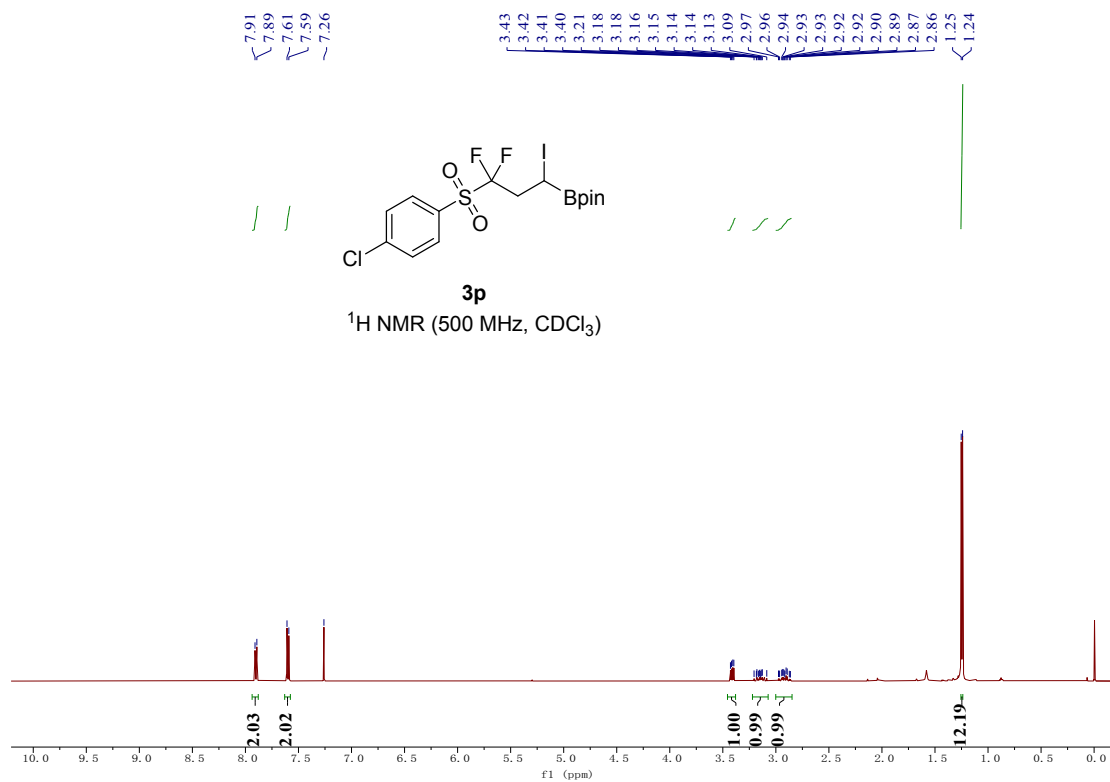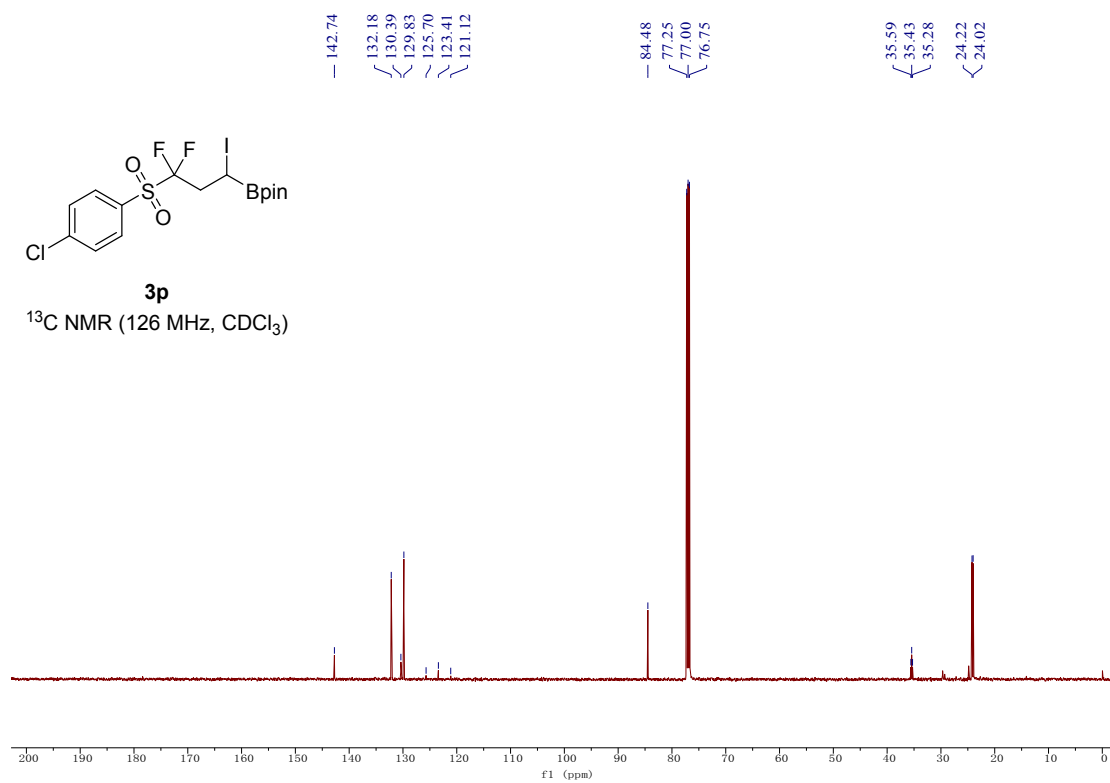

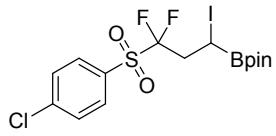

**3p**  
<sup>19</sup>F NMR (376 MHz, CDCl<sub>3</sub>)

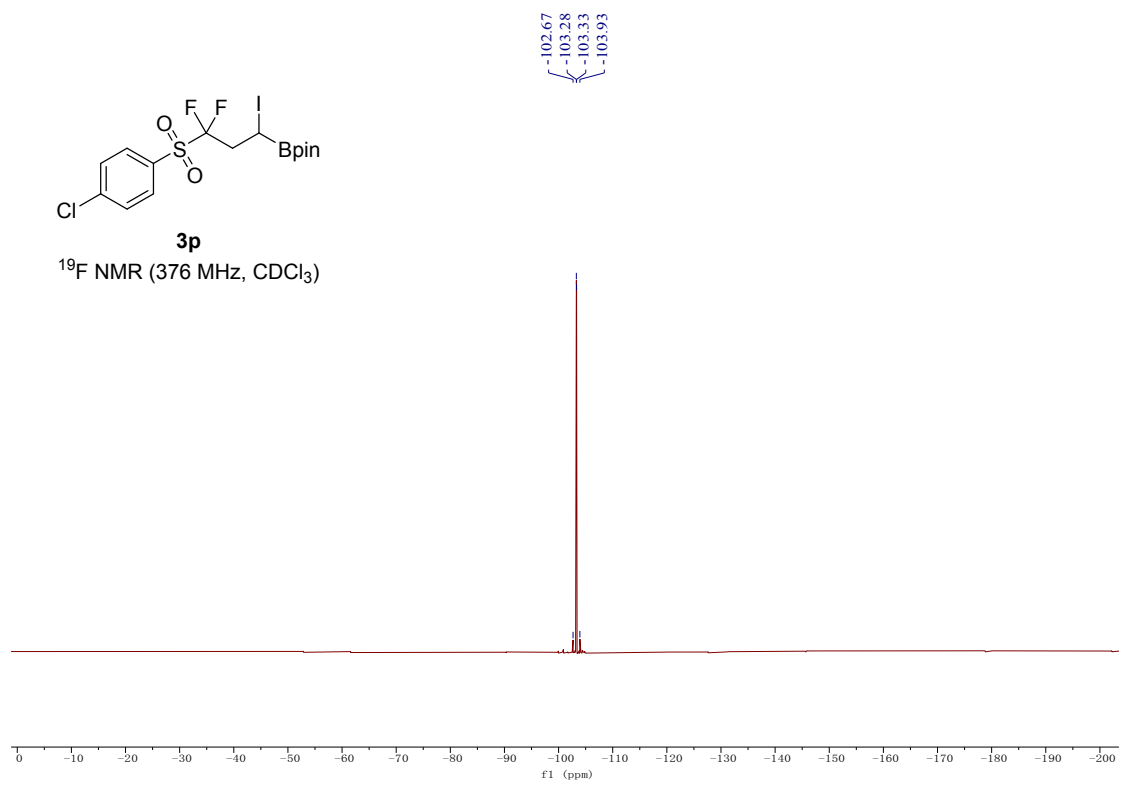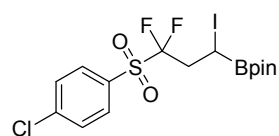

**3p**  
<sup>11</sup>B NMR (128 MHz, CDCl<sub>3</sub>)

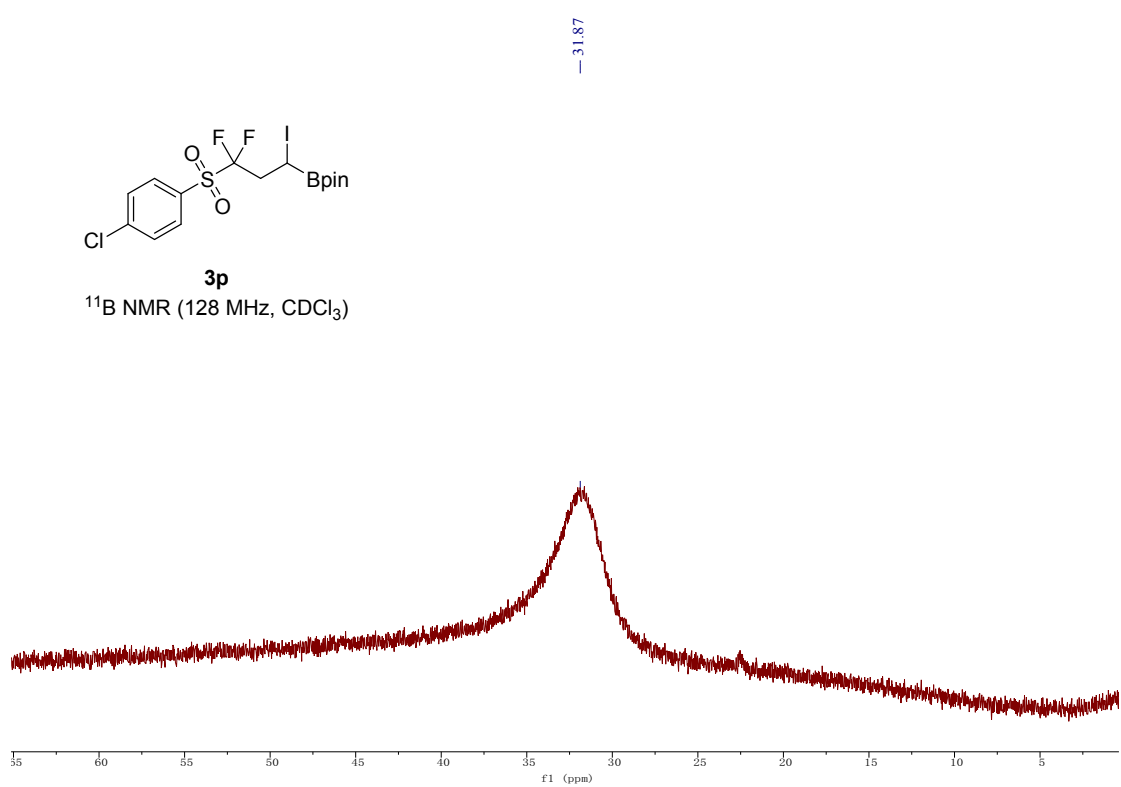

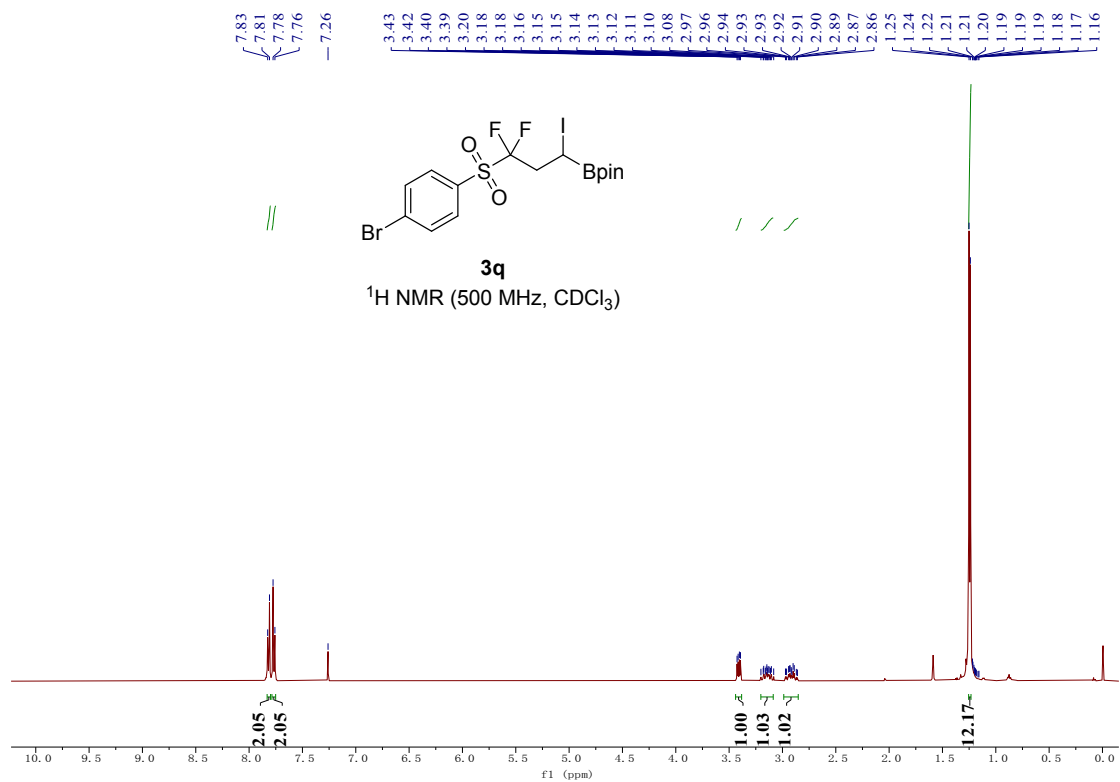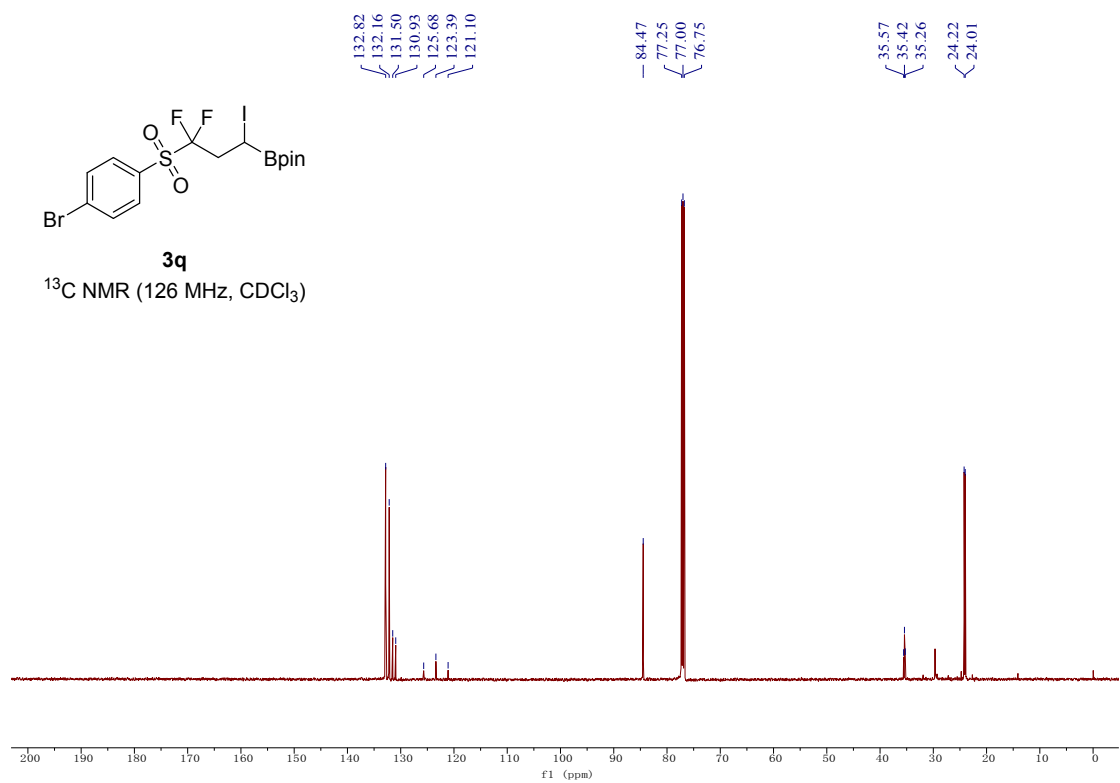

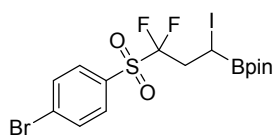

**3q**  
 $^{19}\text{F}$  NMR (376 MHz,  $\text{CDCl}_3$ )

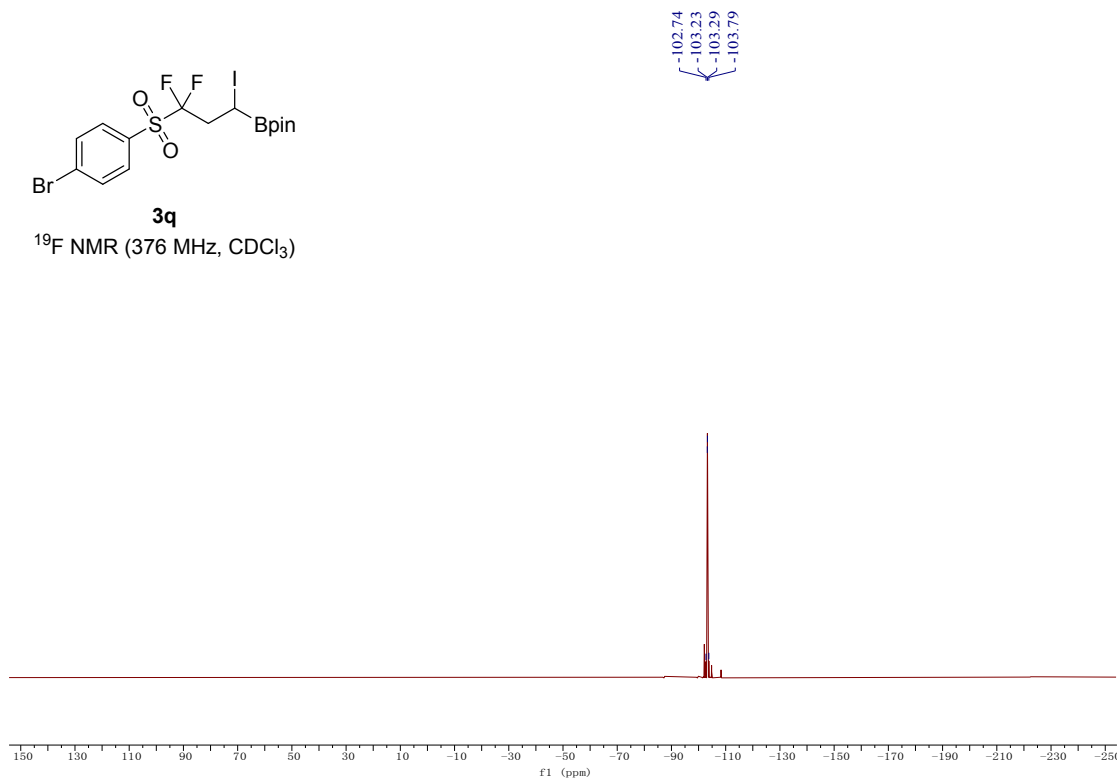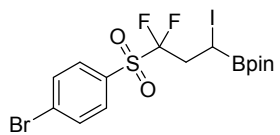

**3q**  
 $^{11}\text{B}$  NMR (128 MHz,  $\text{CDCl}_3$ )

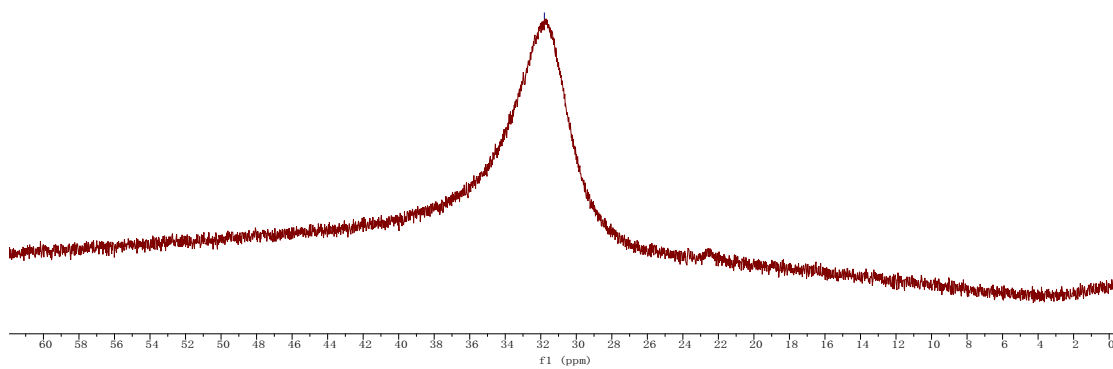



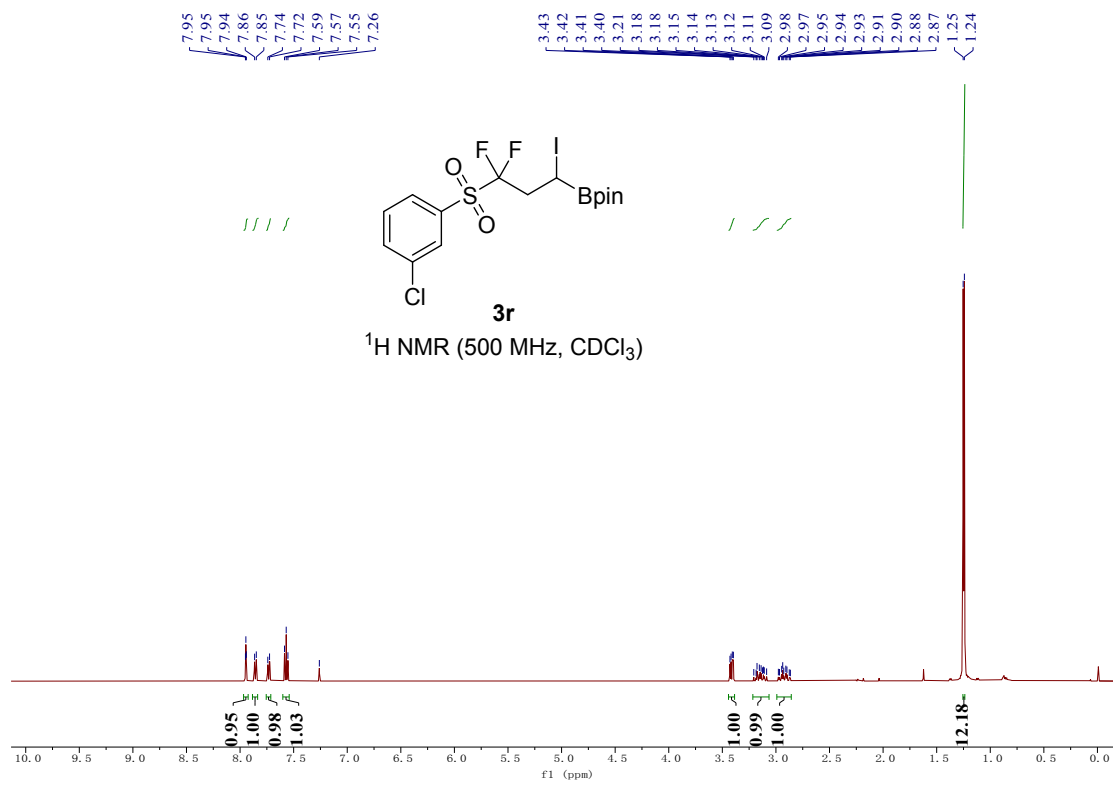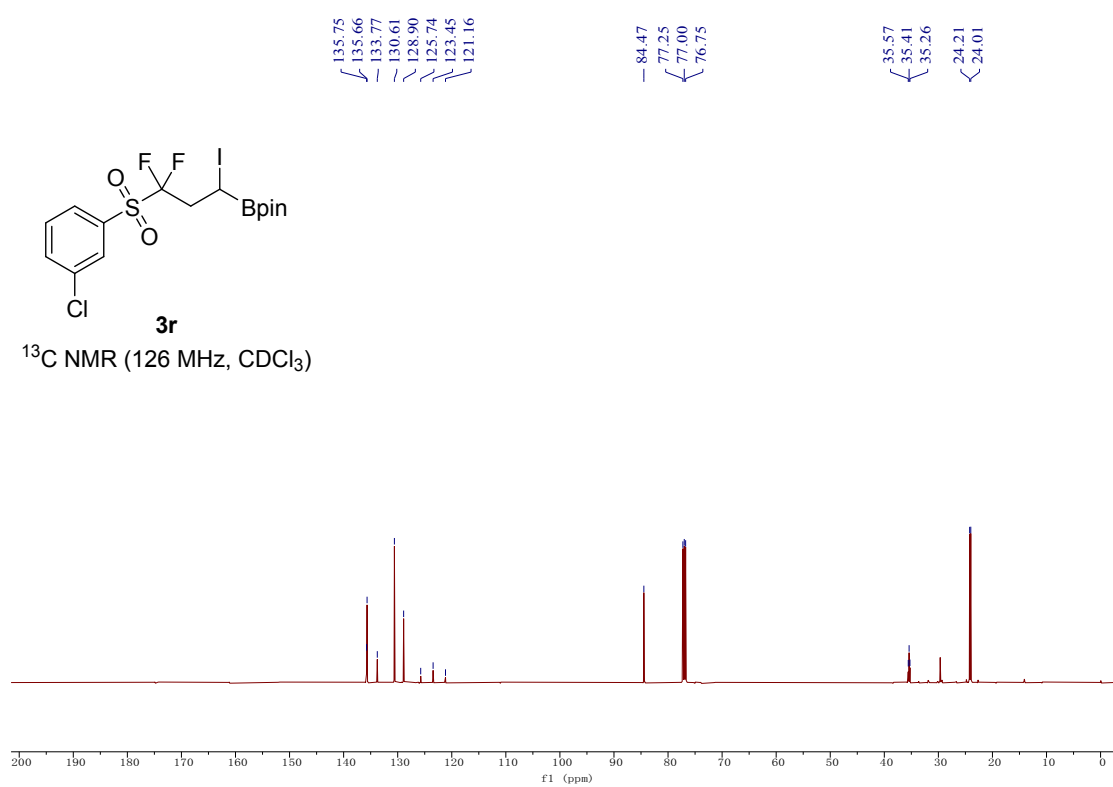

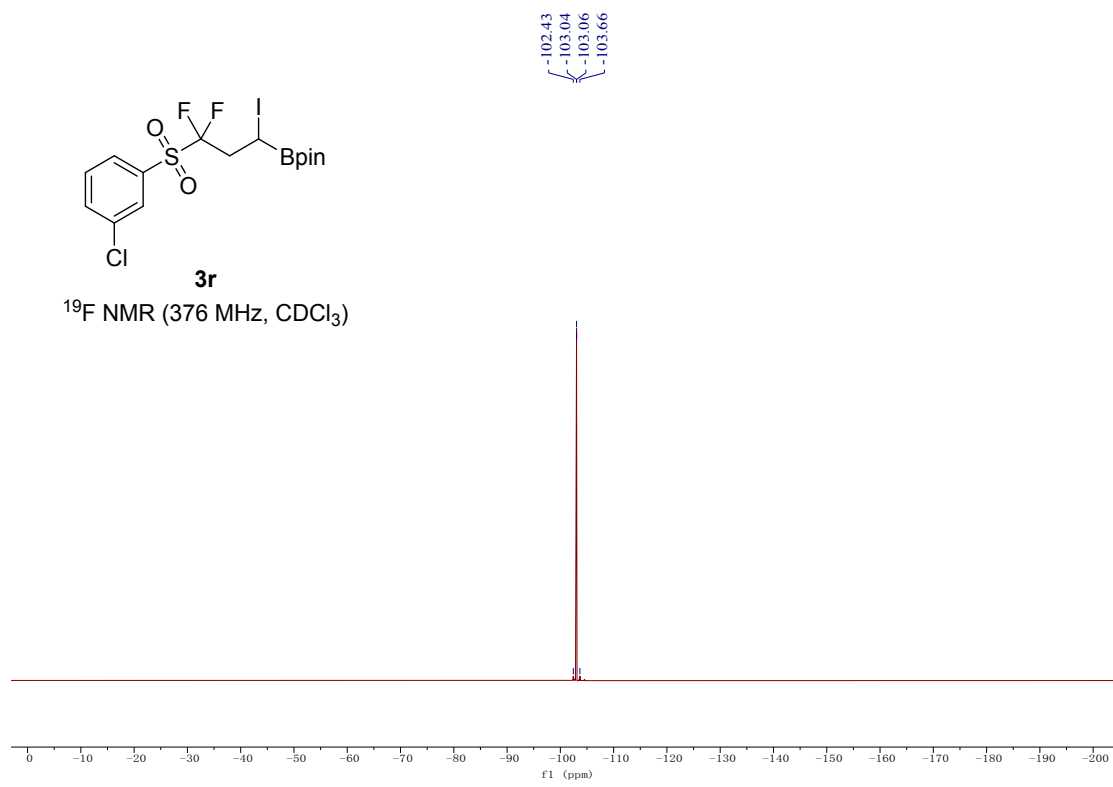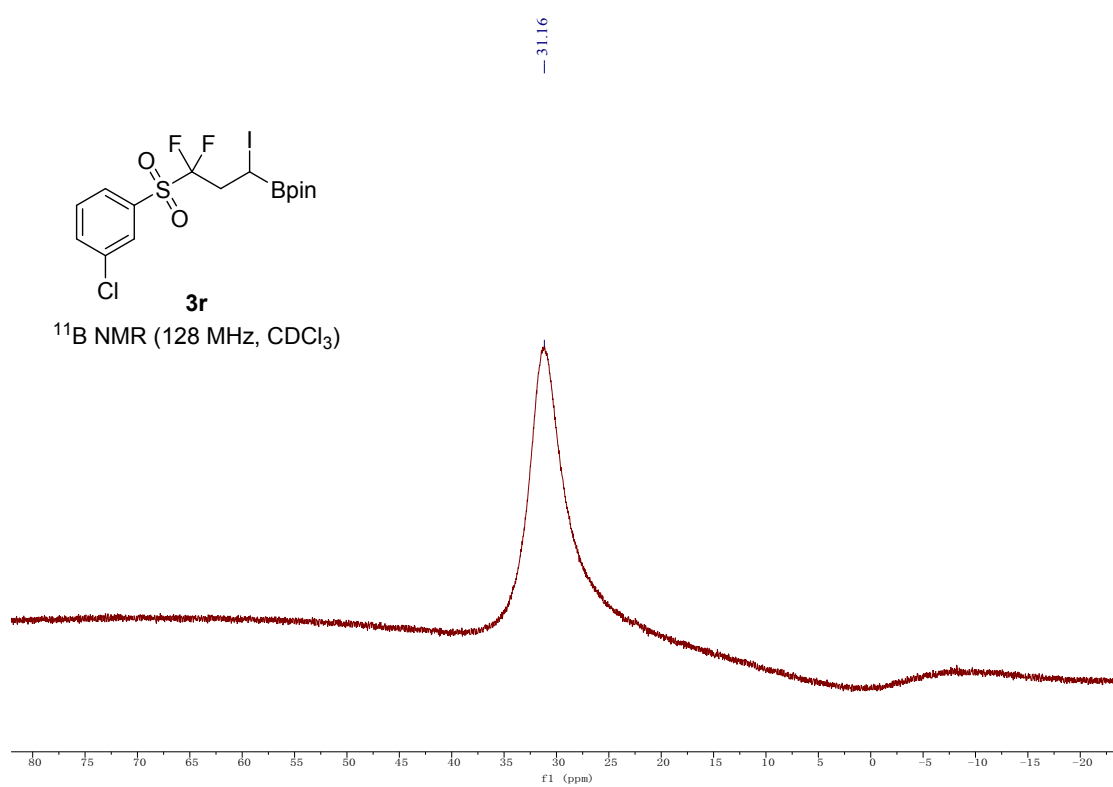

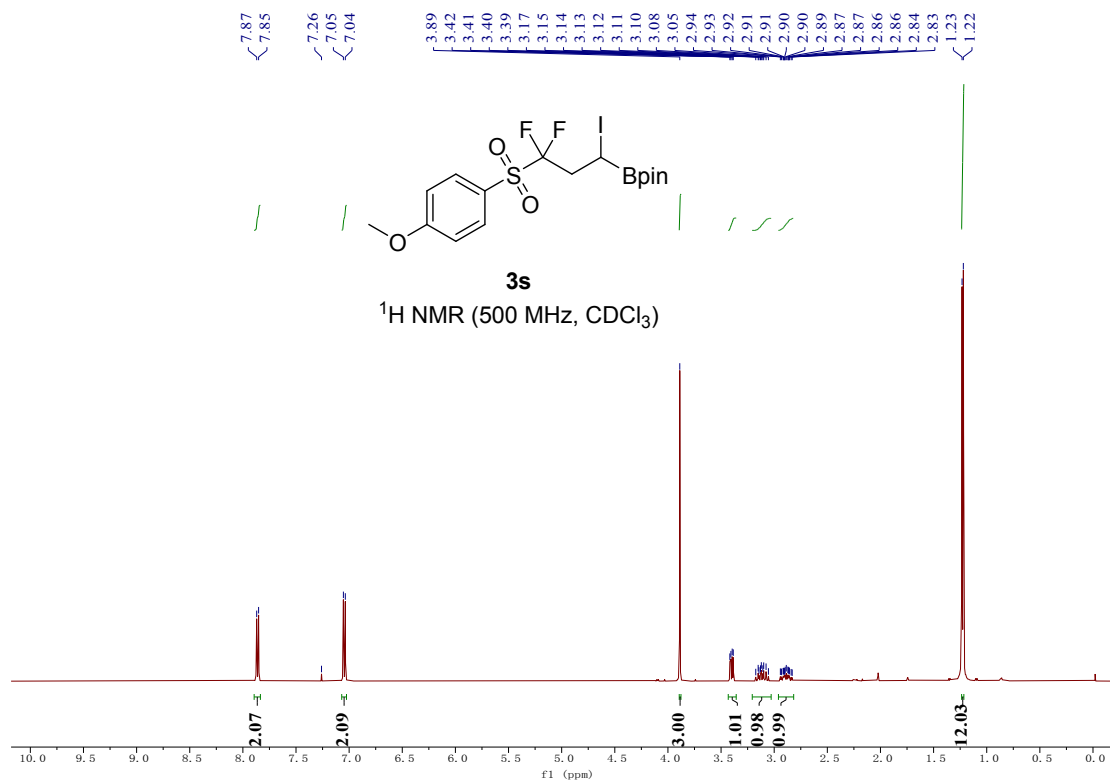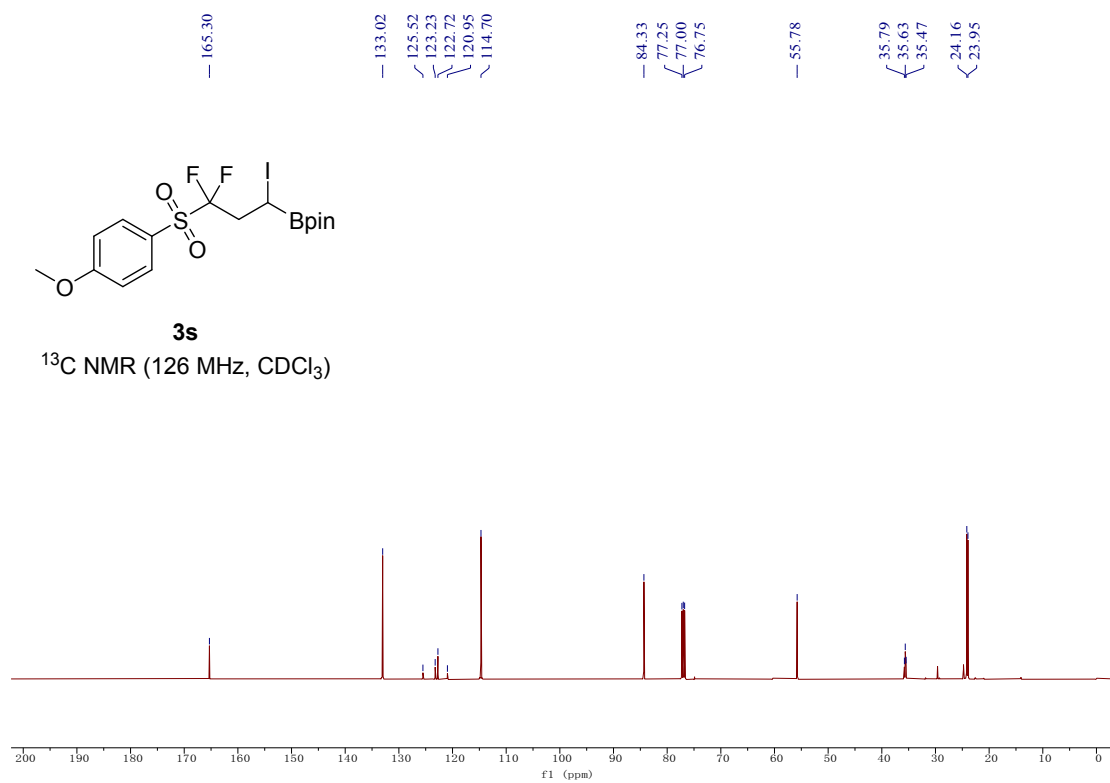

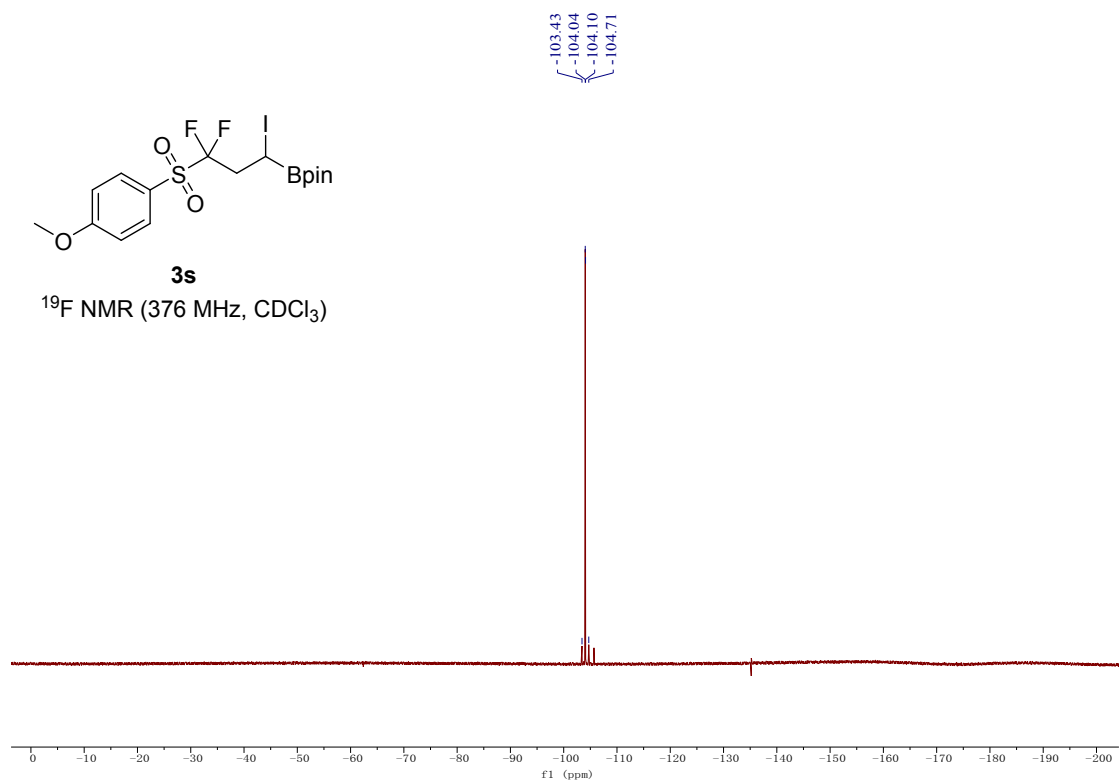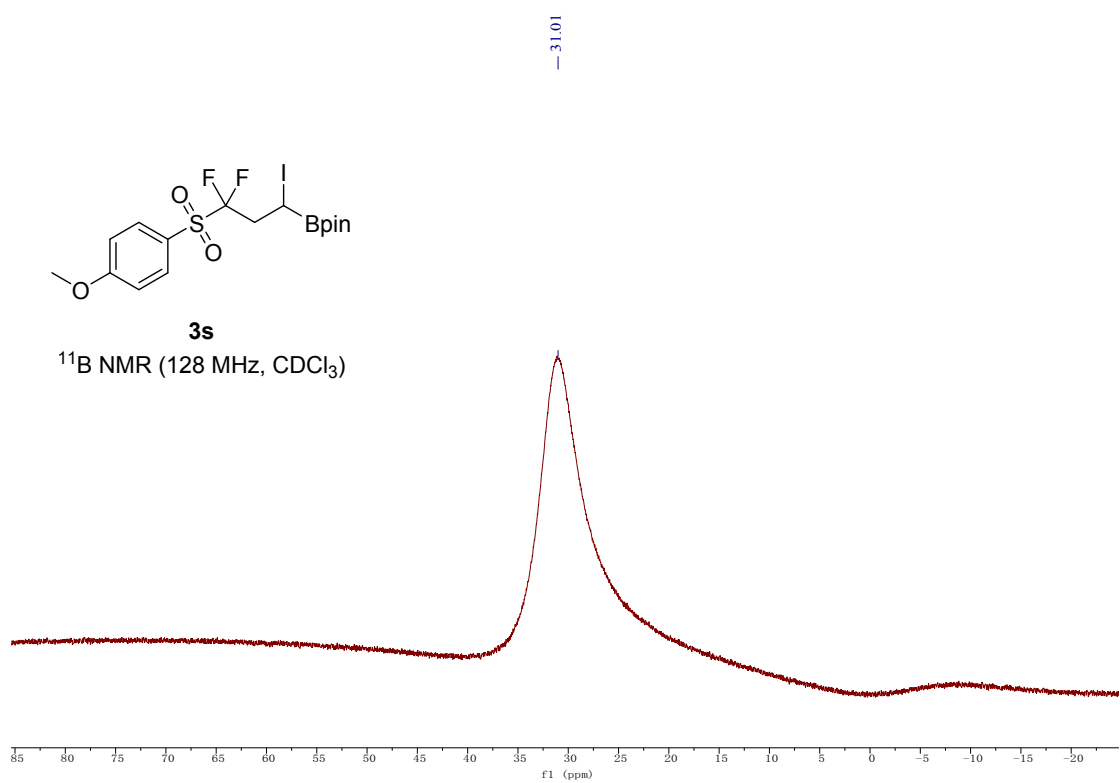

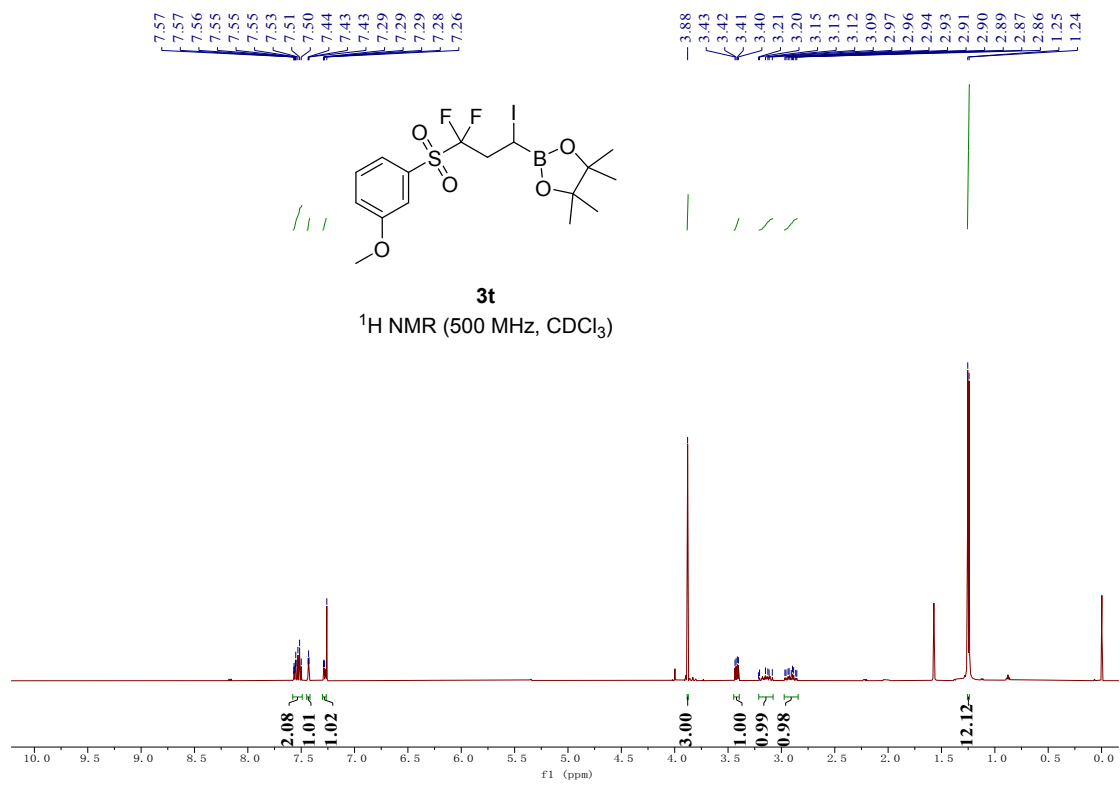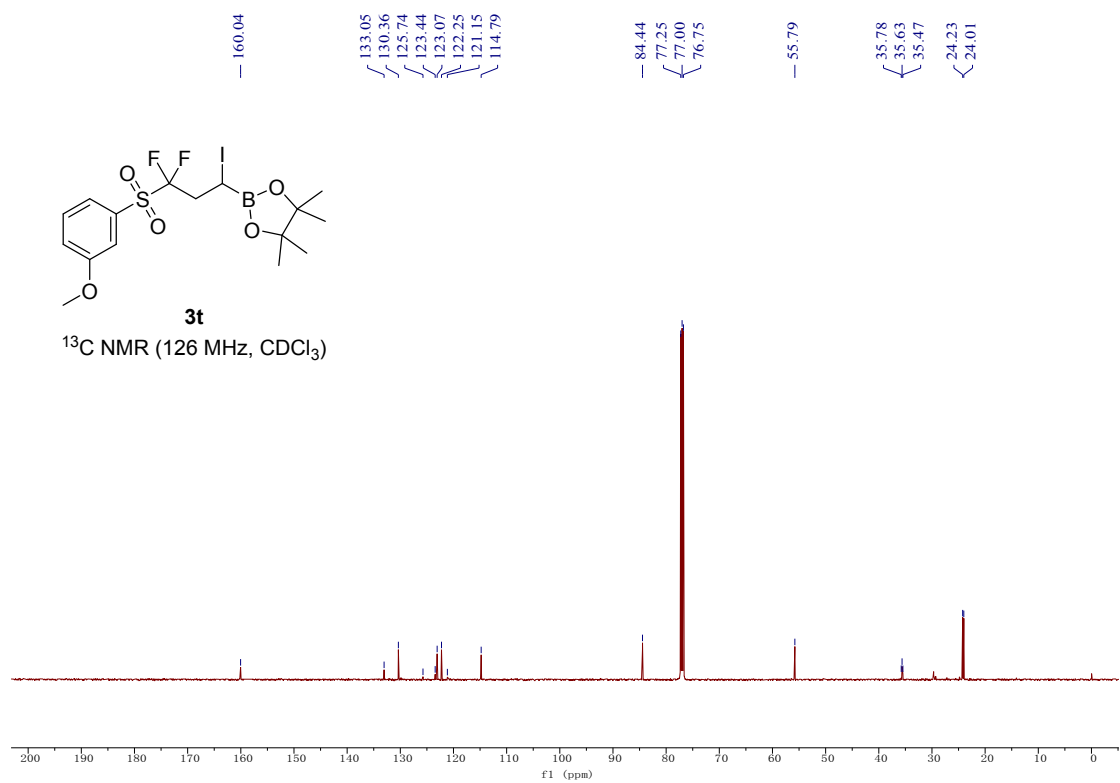

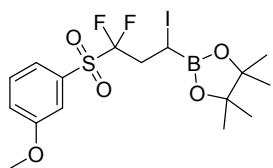

**3t**

$^{19}\text{F}$  NMR (376 MHz,  $\text{CDCl}_3$ )

-103.08  
-103.69  
-103.74  
-104.34

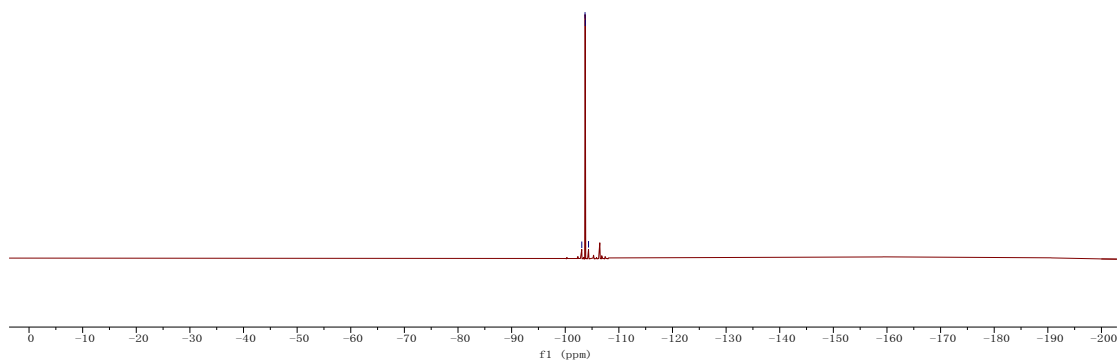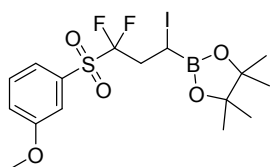

**3t**

$^{11}\text{B}$  NMR (128 MHz,  $\text{CDCl}_3$ )

-31.83

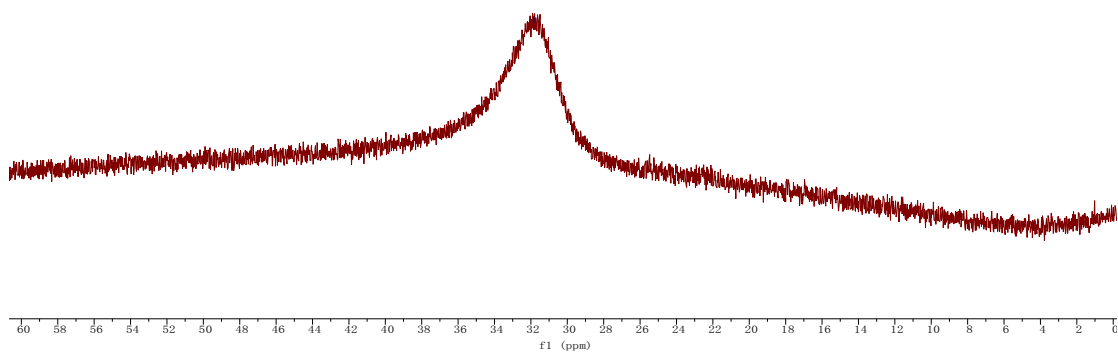

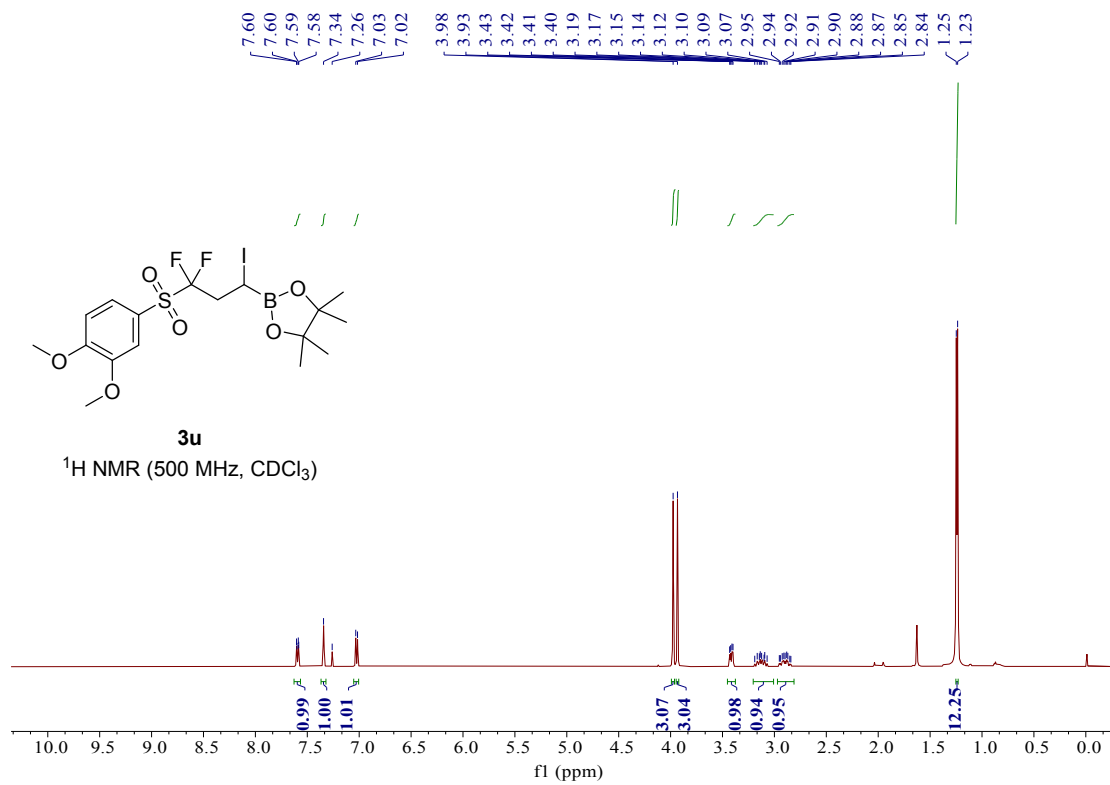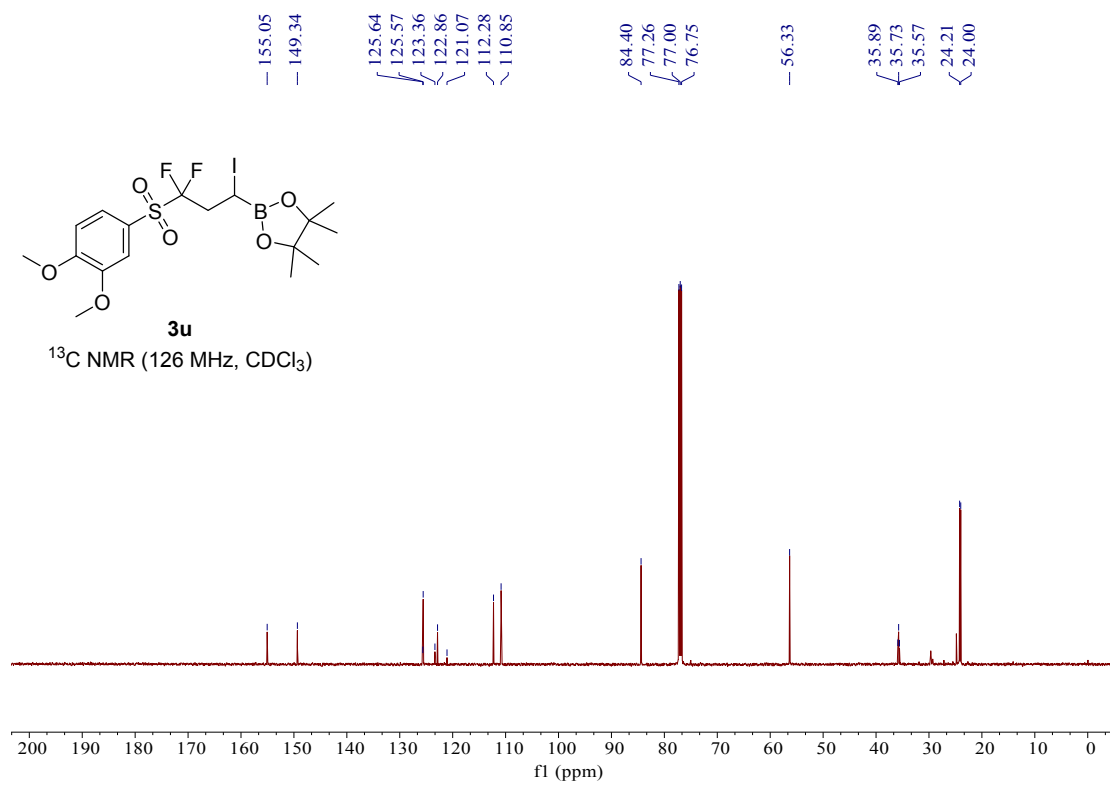

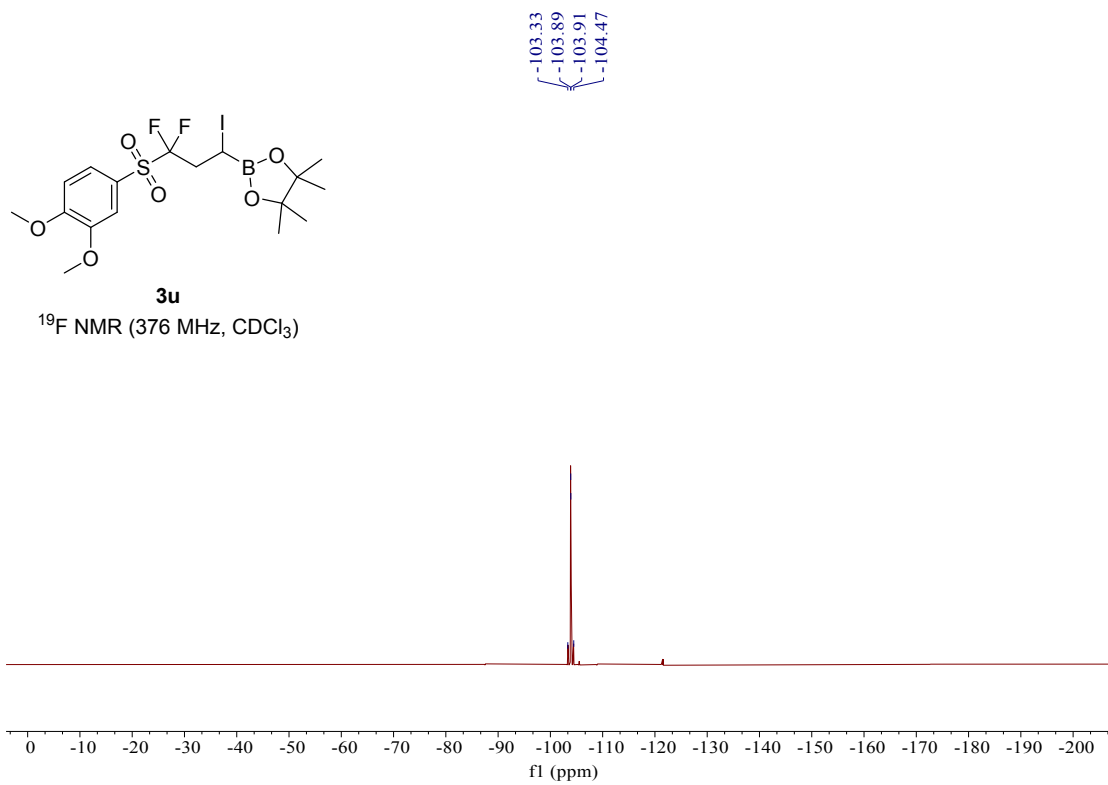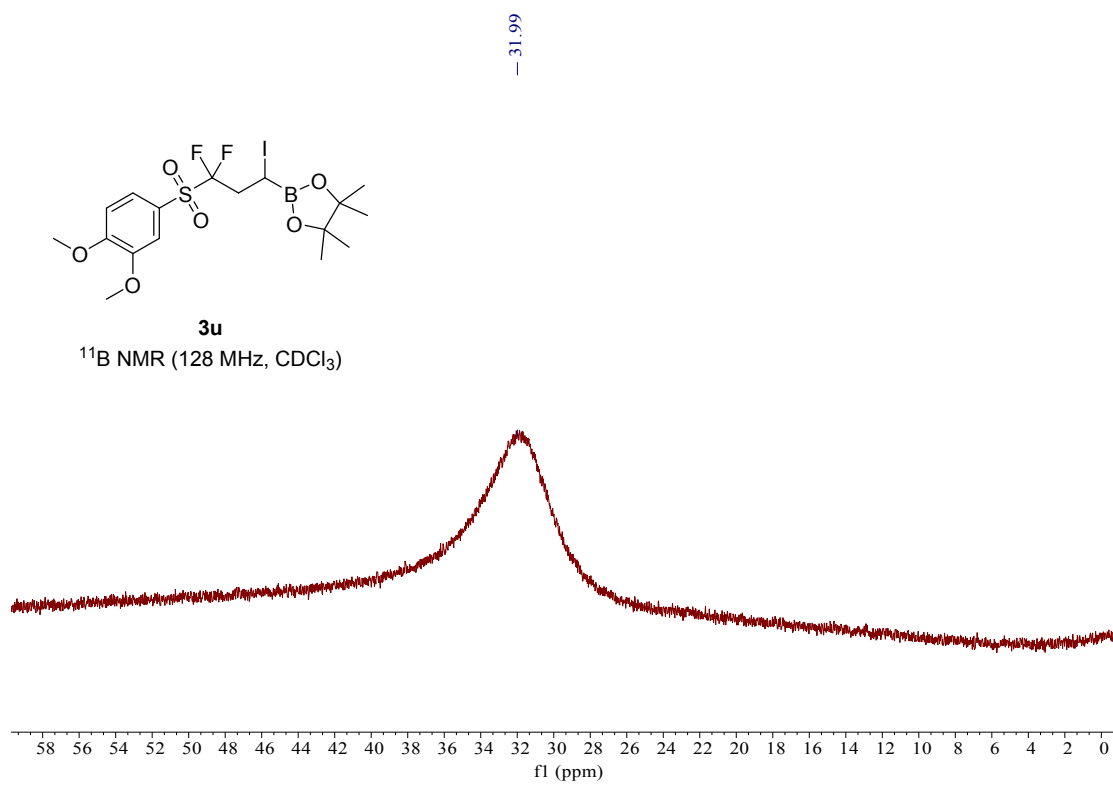



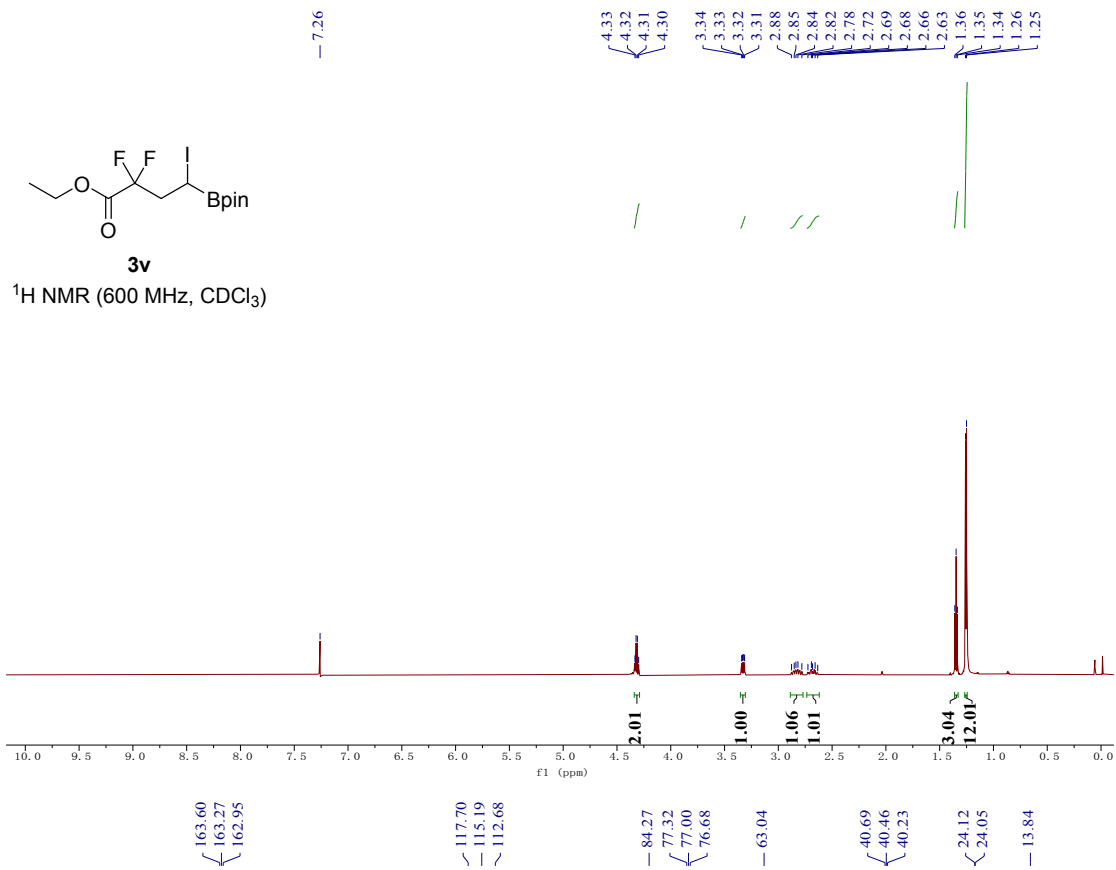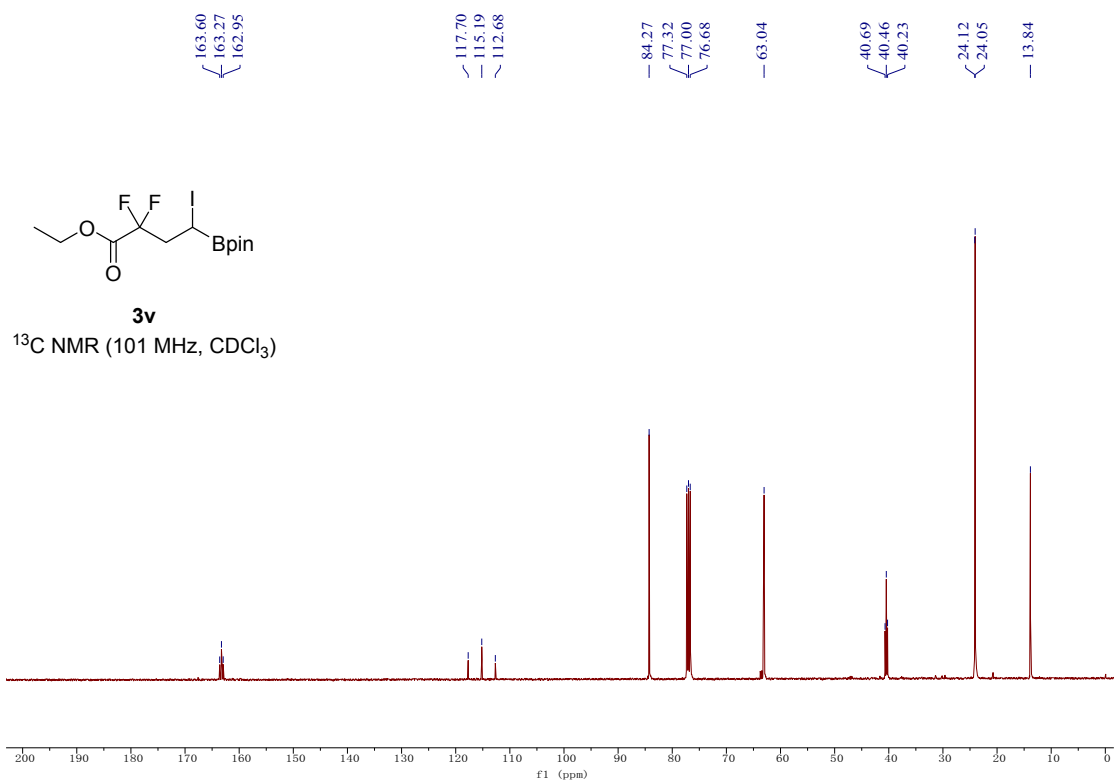

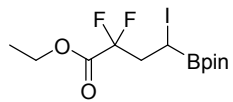

**3v**

$^{19}\text{F}$  NMR (376 MHz,  $\text{CDCl}_3$ )

-104.82  
-105.52  
-106.76  
-107.45

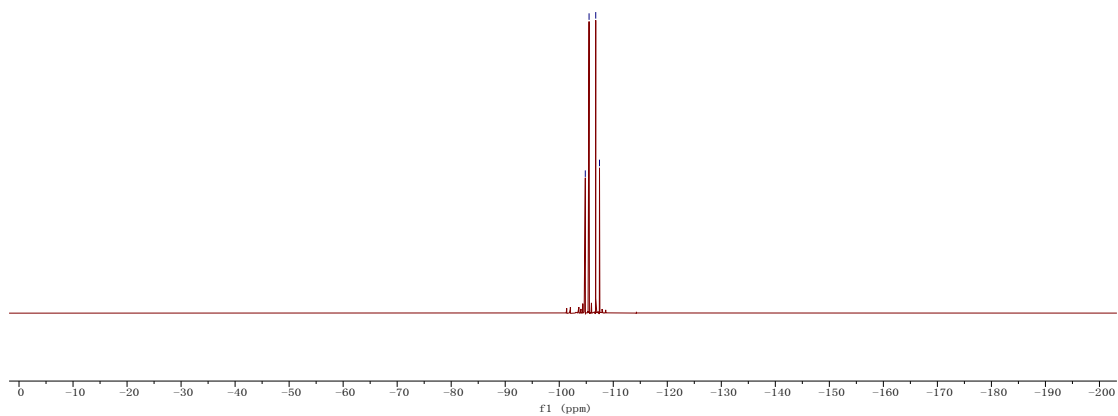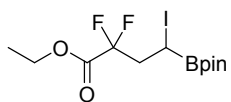

**3v**

$^{11}\text{B}$  NMR (128 MHz,  $\text{CDCl}_3$ )

-31.29

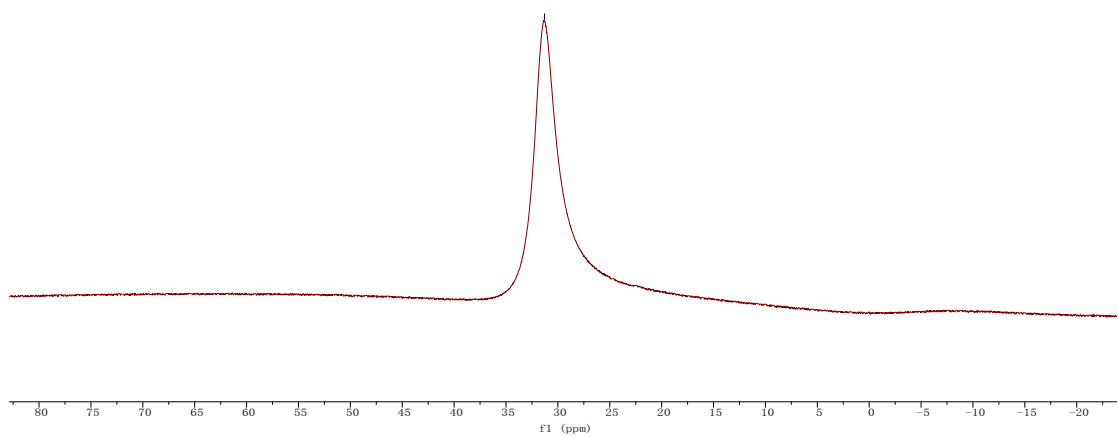

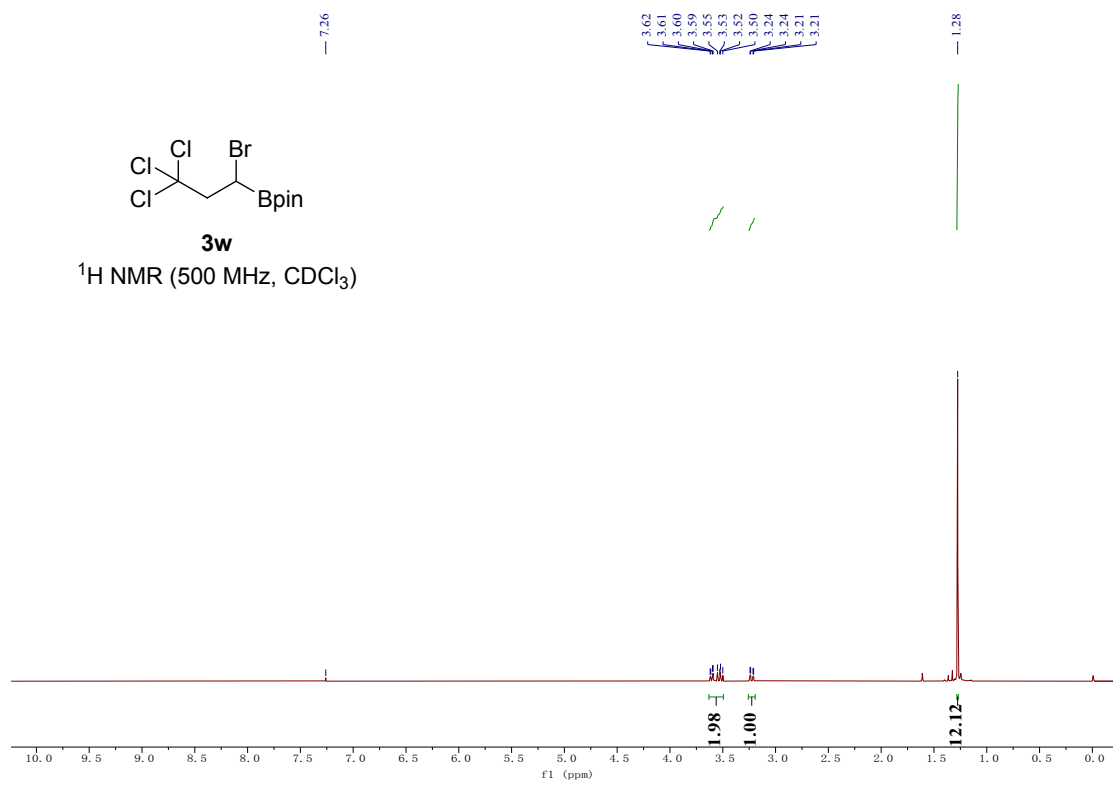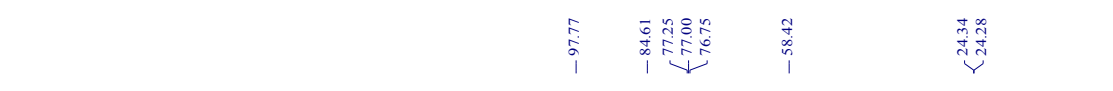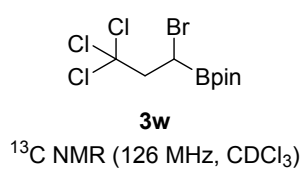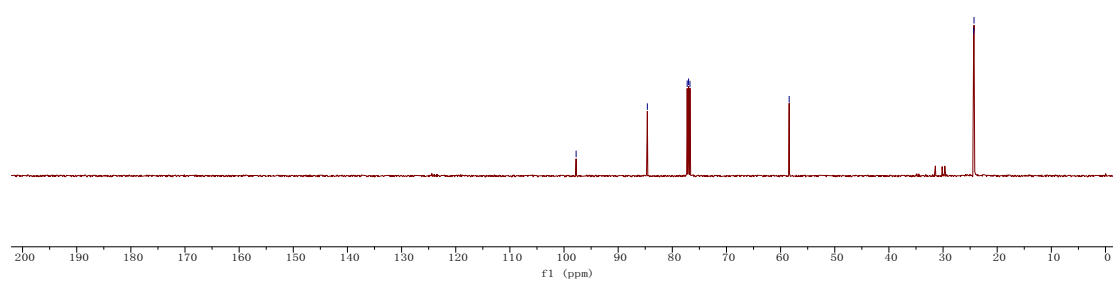

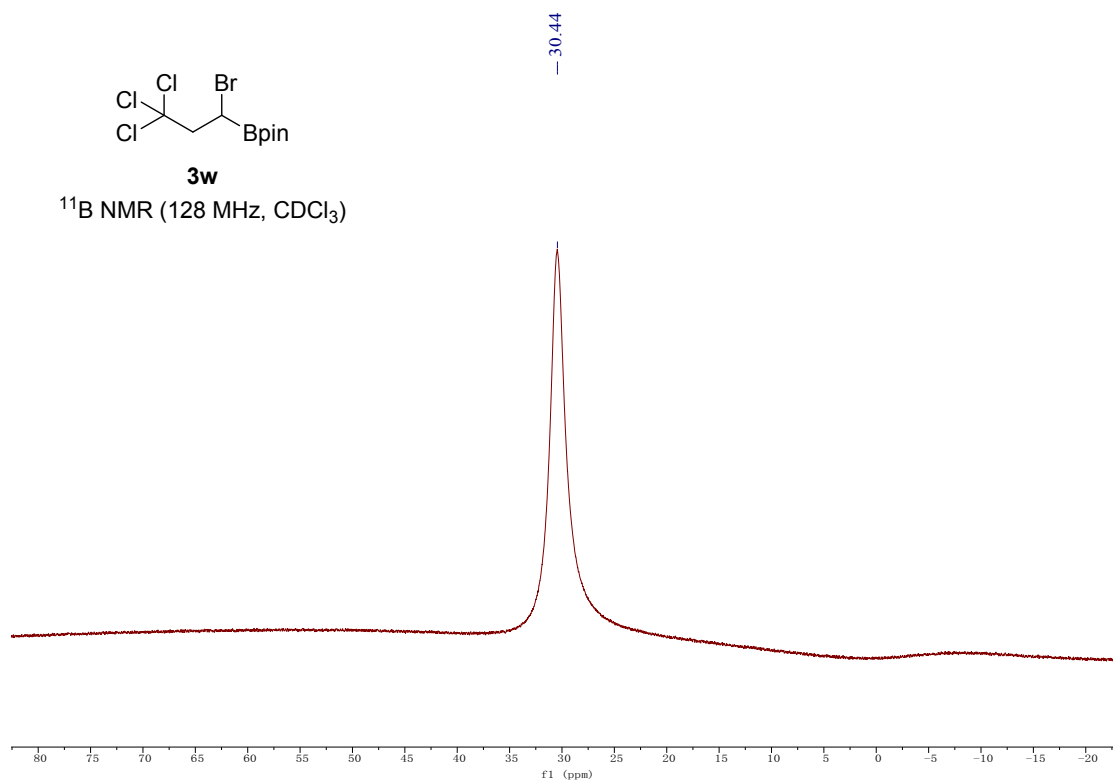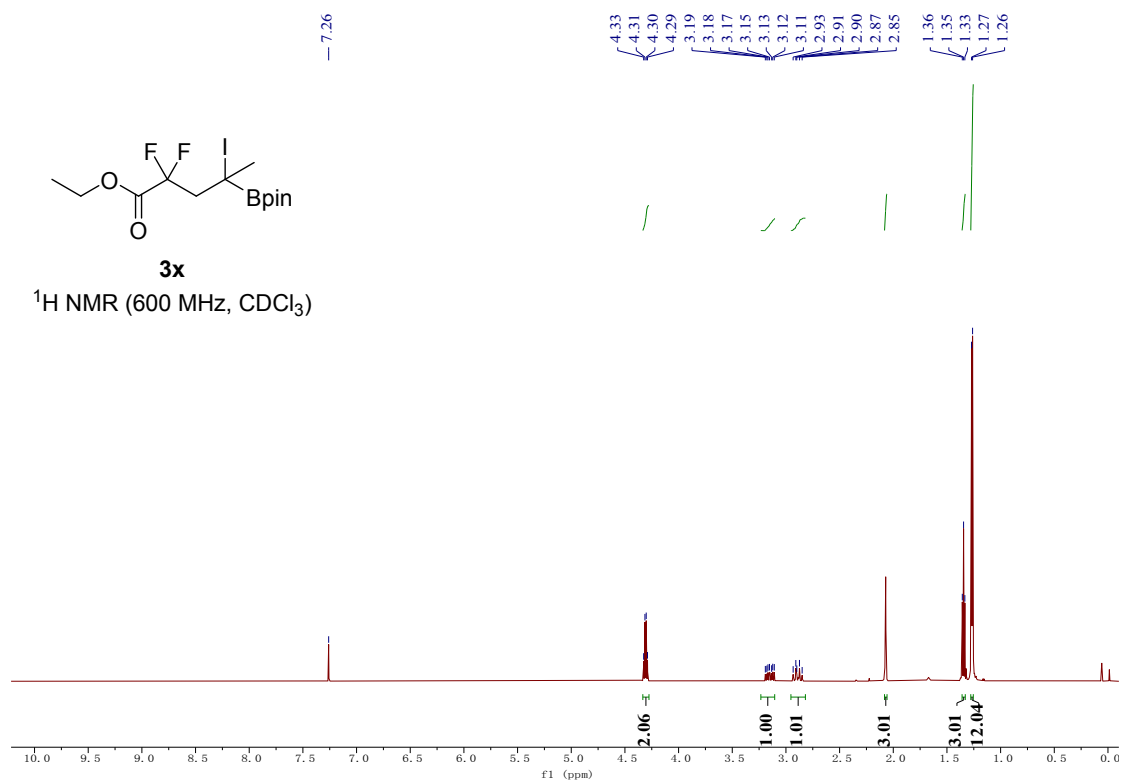

163.73  
163.51  
163.30

117.05  
115.36  
113.68

84.38  
77.21  
77.00  
76.79

63.03

47.90  
47.76  
47.61

29.37  
24.13  
24.09

13.85

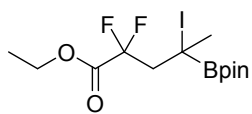

**3x**

<sup>13</sup>C NMR (151 MHz, CDCl<sub>3</sub>)

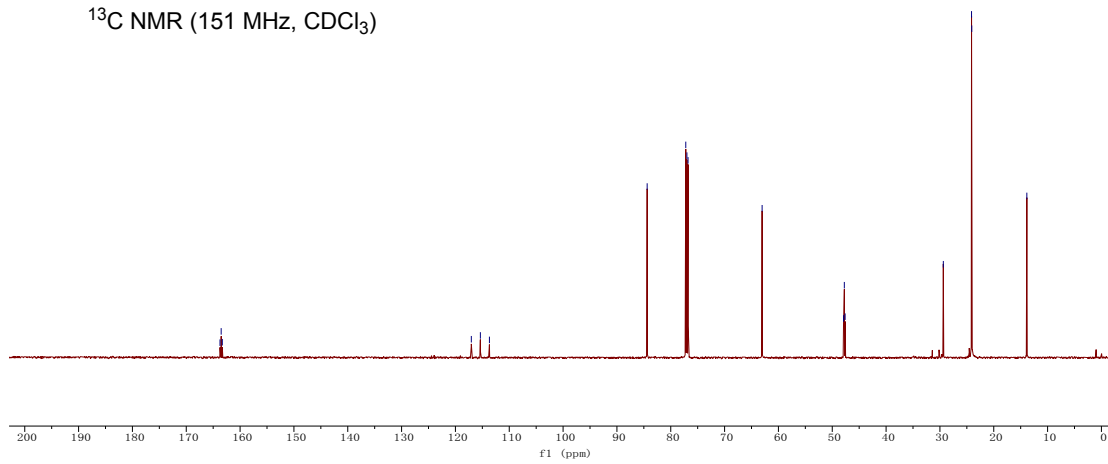

-101.05  
-101.52  
-104.55  
-105.02

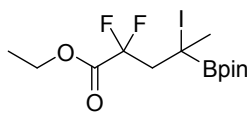

**3x**

<sup>19</sup>F NMR (565 MHz, CDCl<sub>3</sub>)

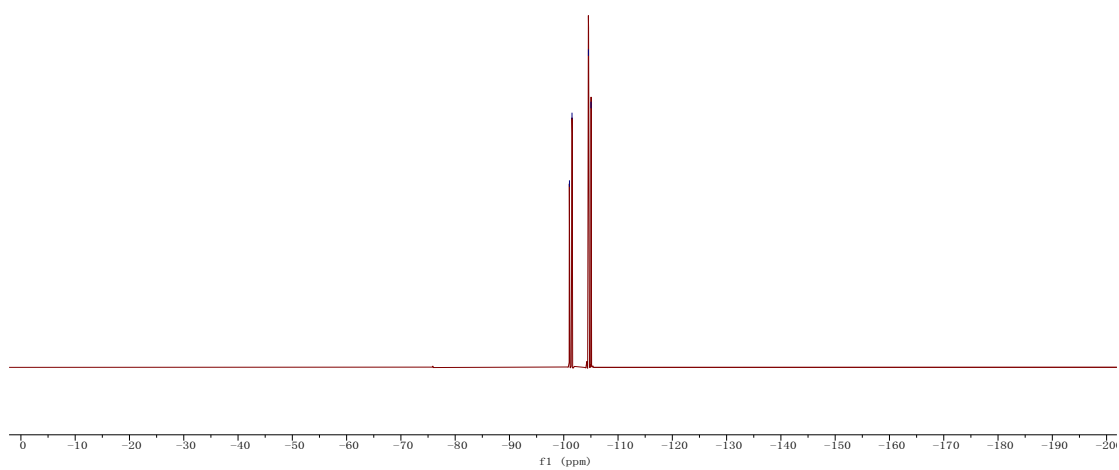

- 32.11

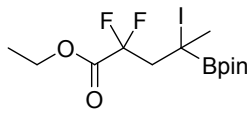

**3x**

$^{11}\text{B}$  NMR (128 MHz,  $\text{CDCl}_3$ )

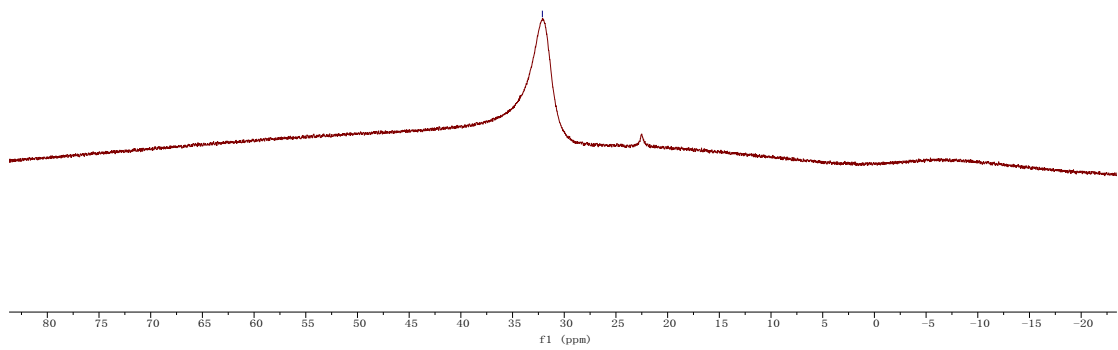

7.84  
7.26  
3.60  
3.59  
3.58  
3.57  
3.09  
3.08  
3.07  
3.06  
3.04  
3.03  
3.01  
3.00  
2.90  
2.89  
2.88  
2.87  
2.86  
2.84  
2.83  
2.82  
2.80  
1.31

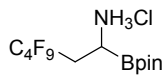

**4**

$^1\text{H}$  NMR (500 MHz,  $\text{CDCl}_3$ )

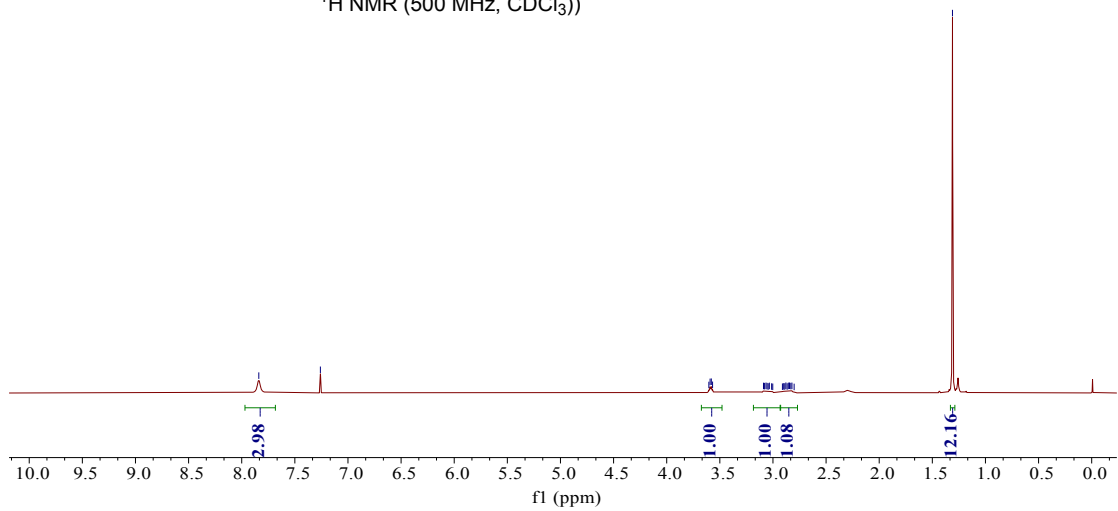

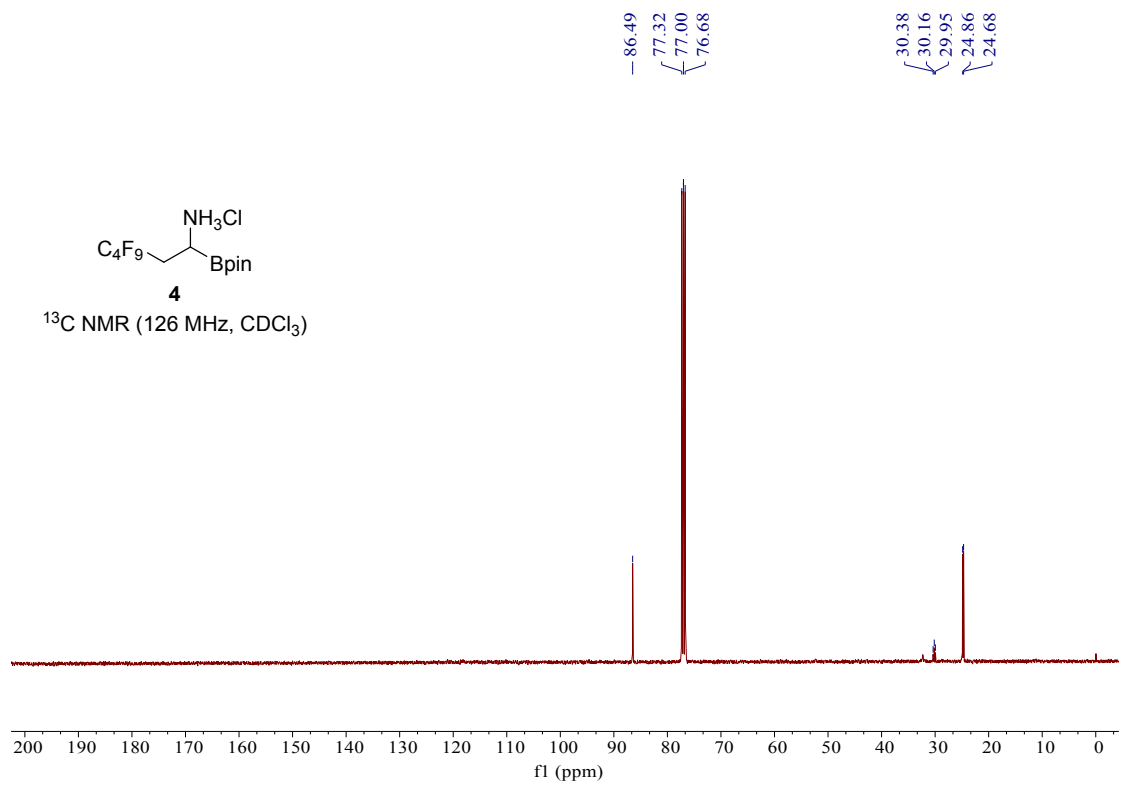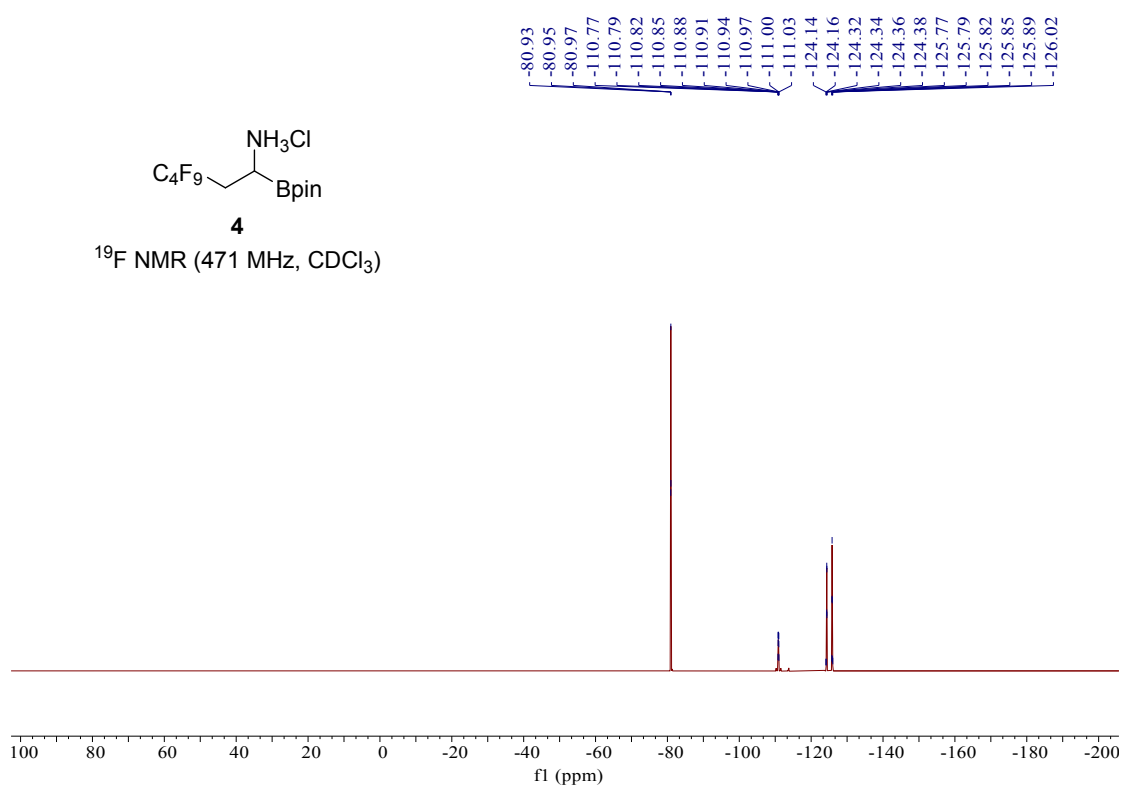

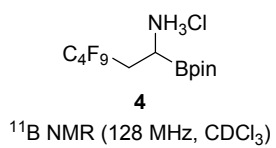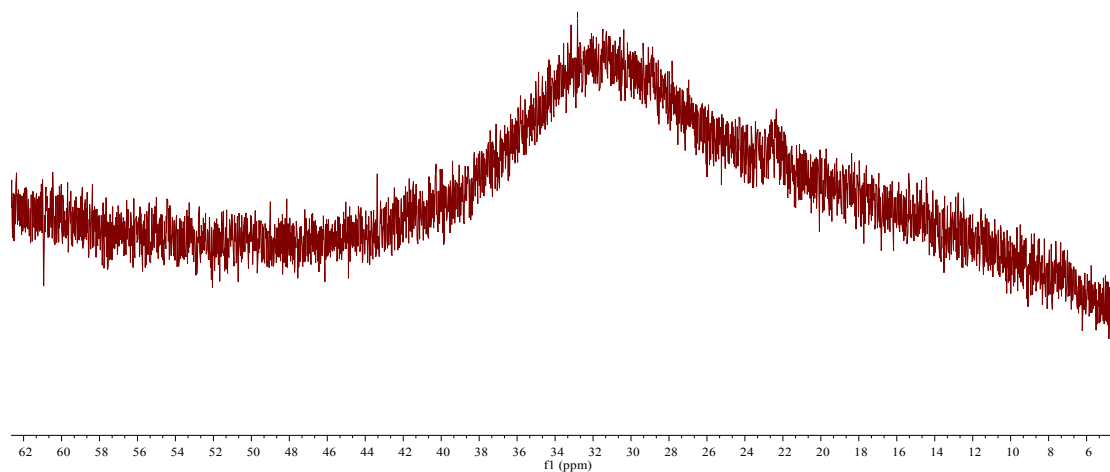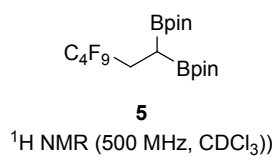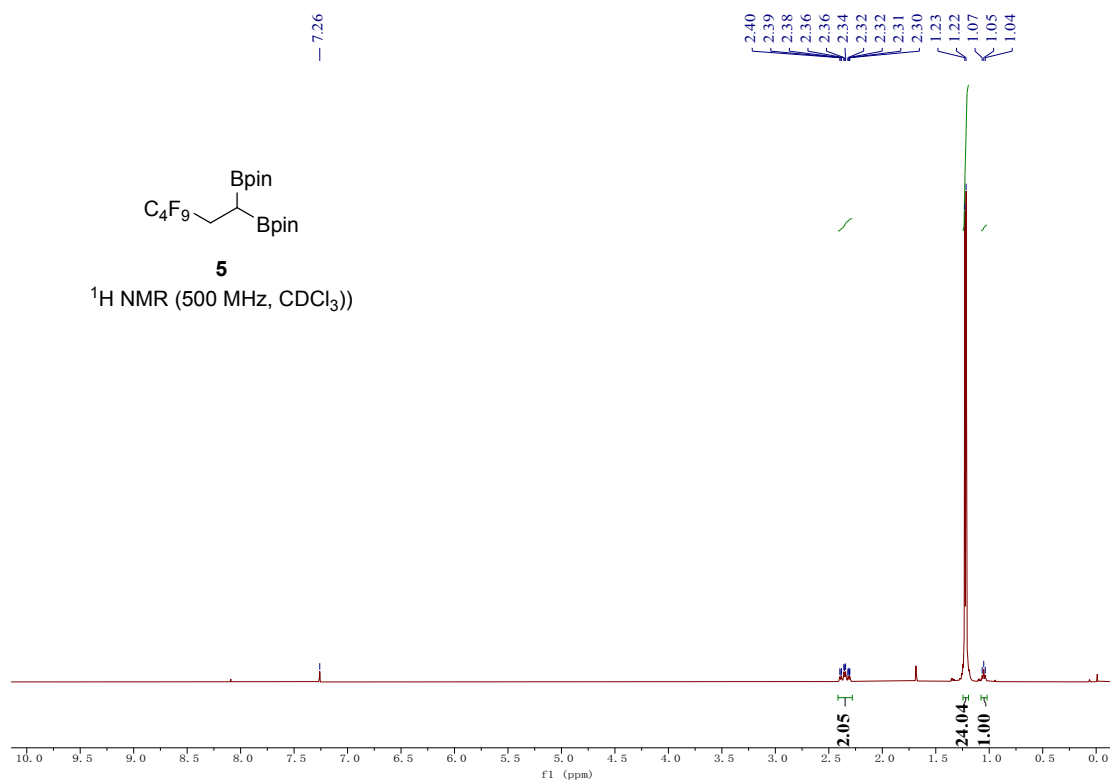



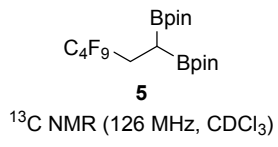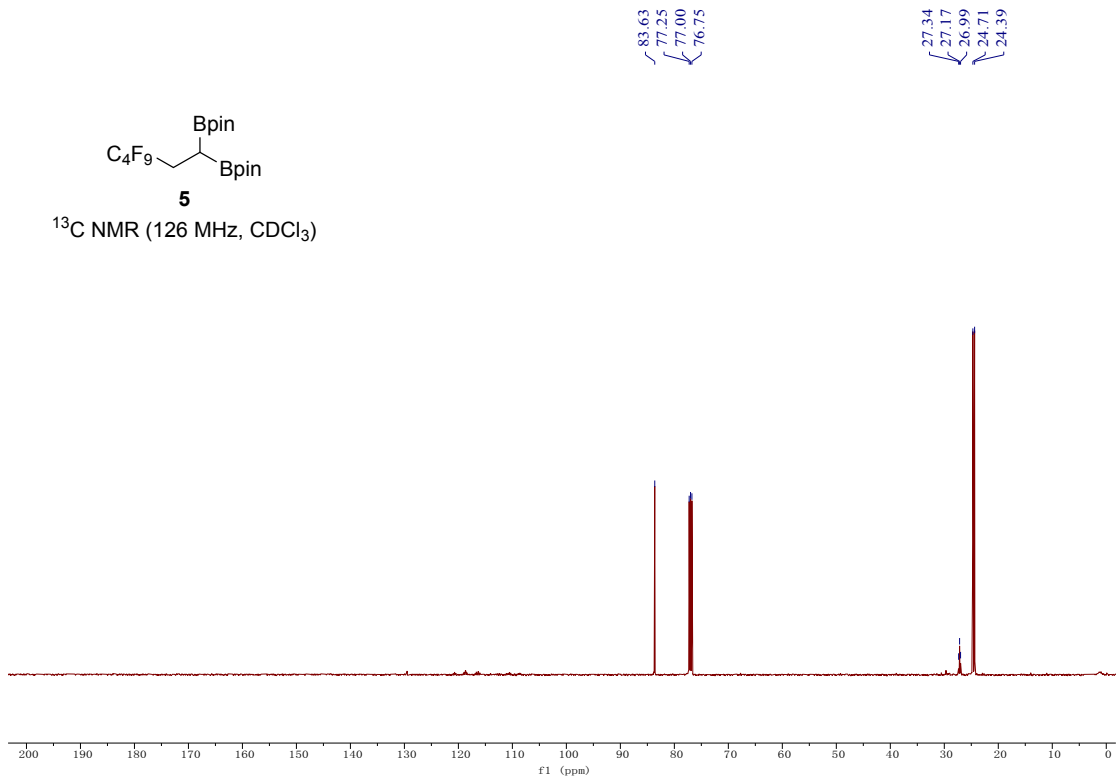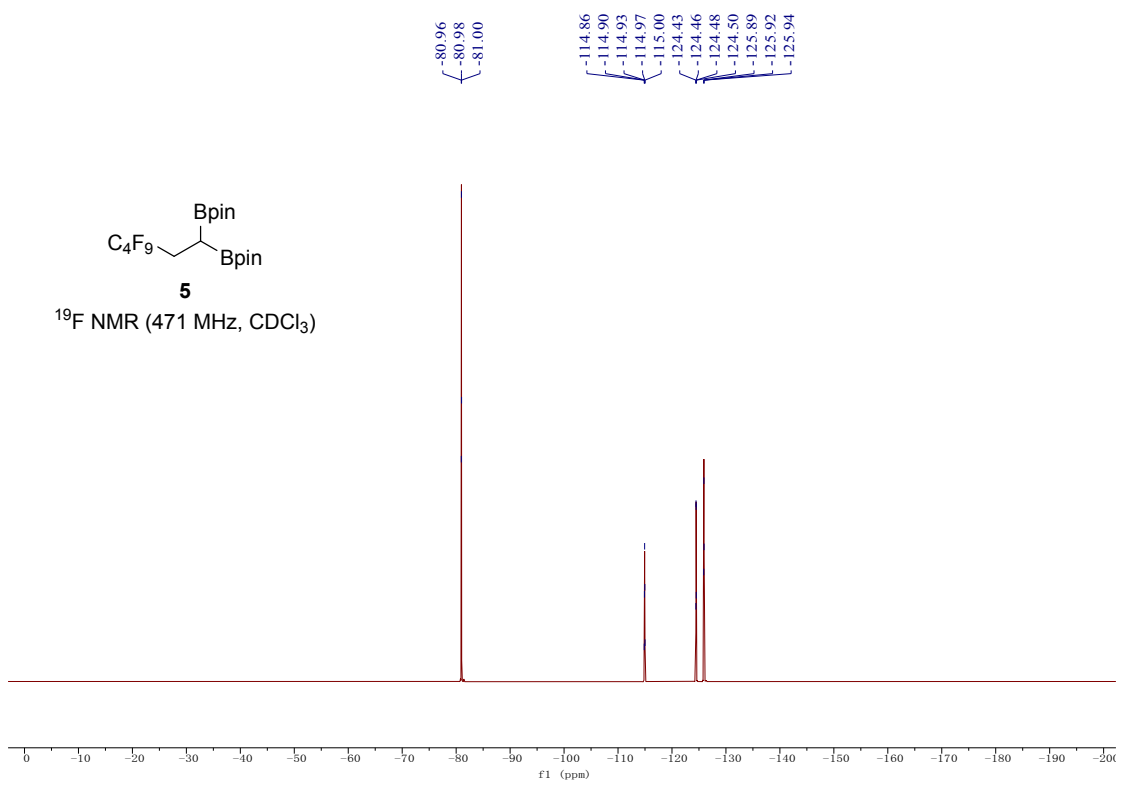

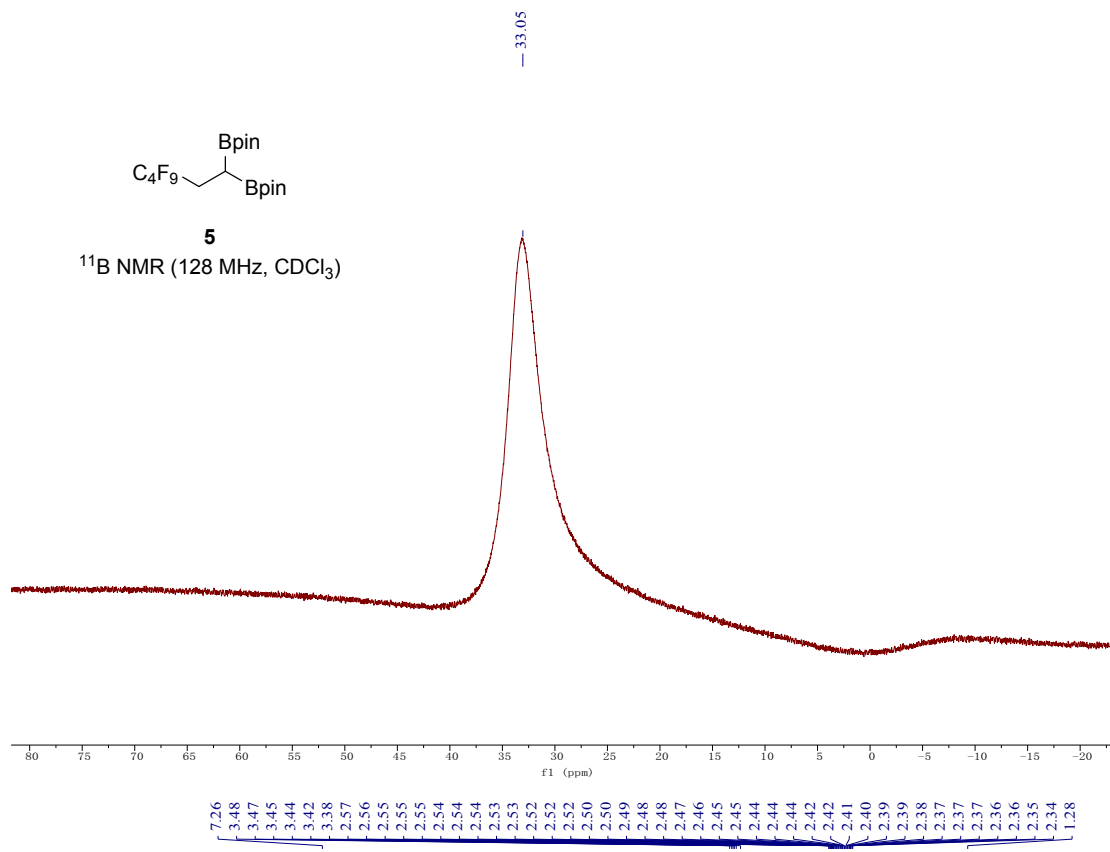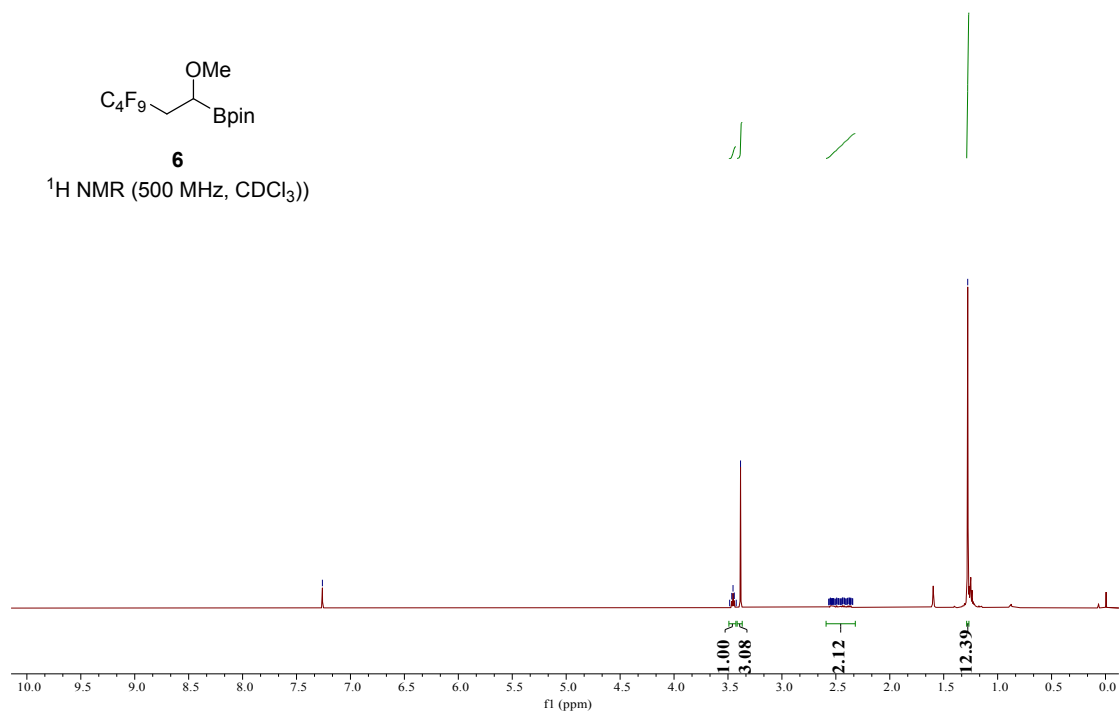

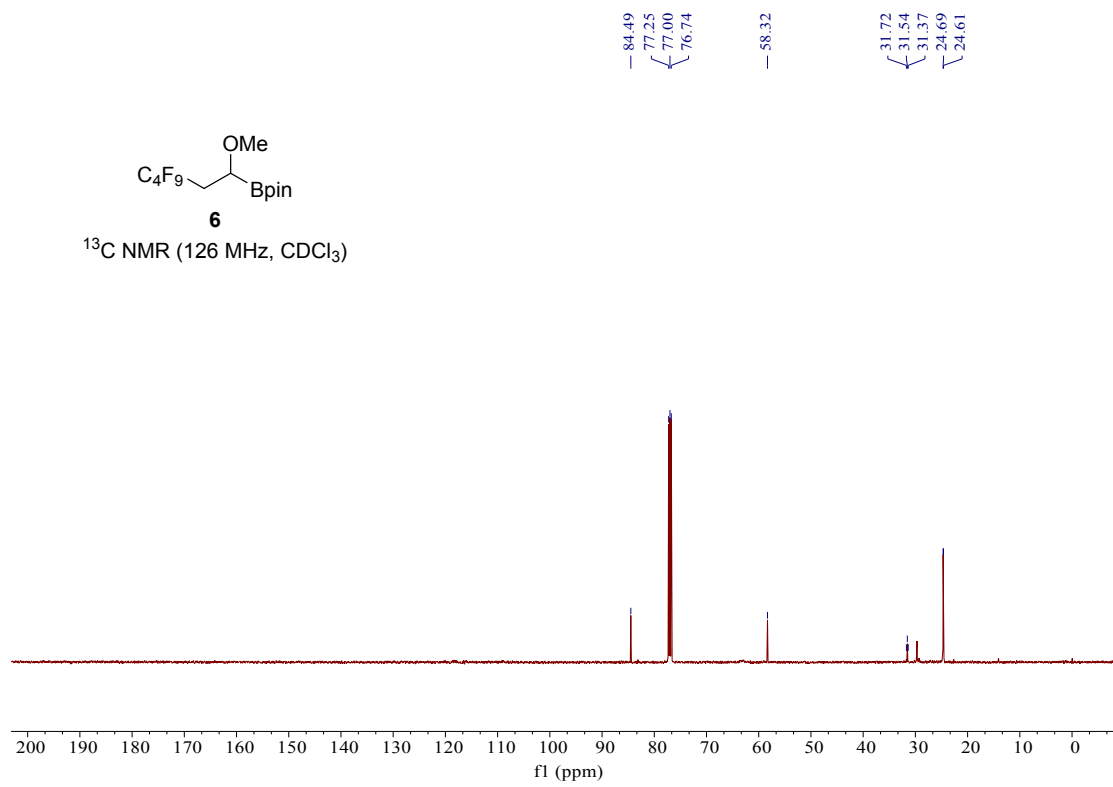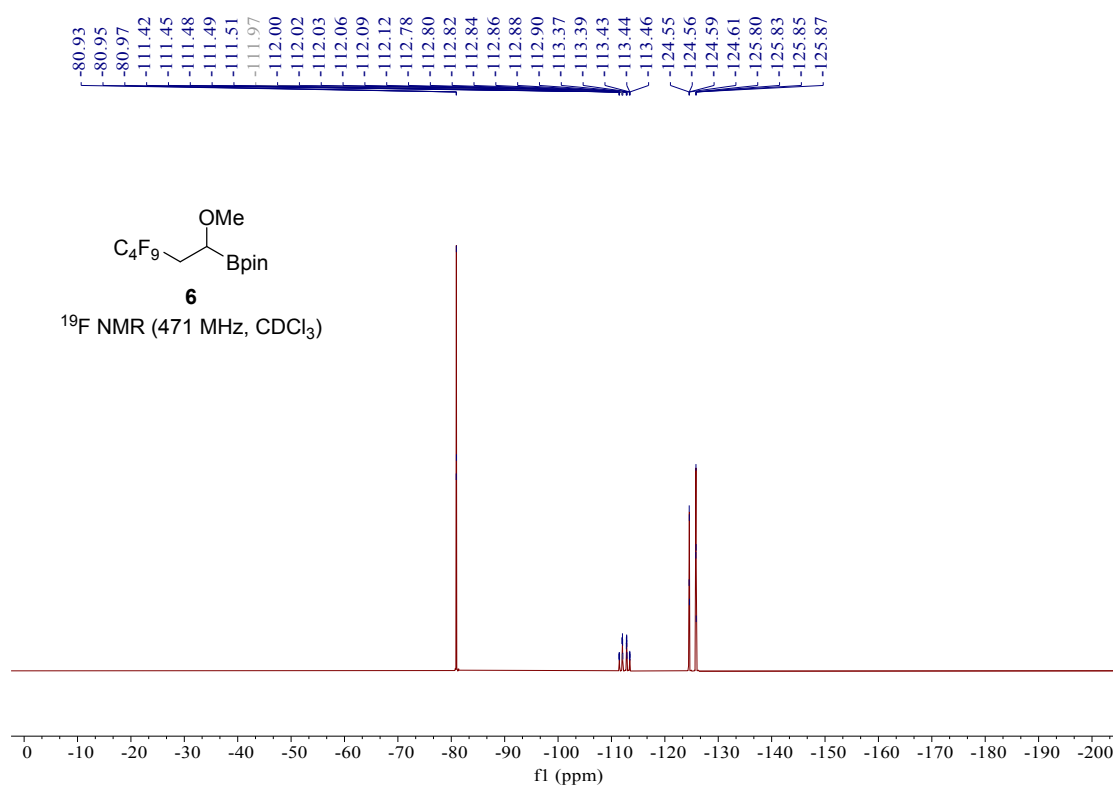

32.06

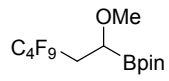

**6**

$^{11}\text{B}$  NMR (128 MHz,  $\text{CDCl}_3$ )

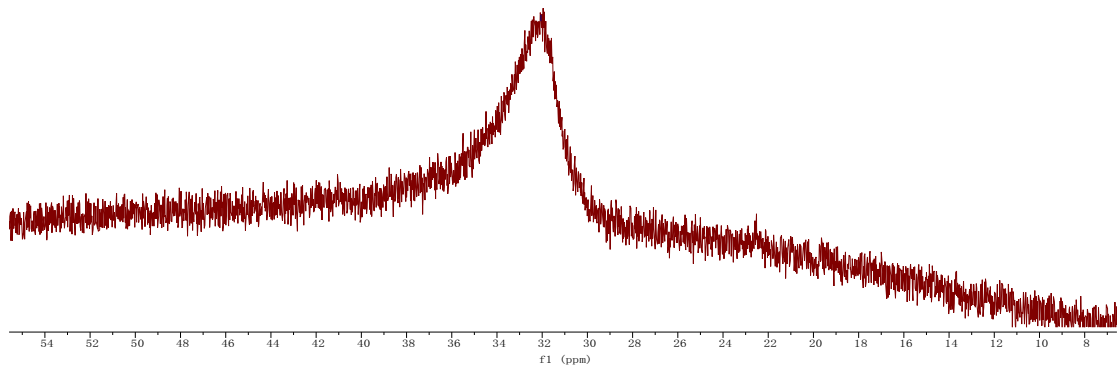

2.92  
2.83  
2.76  
2.73  
2.72  
2.70  
2.67  
2.66  
2.43  
2.42  
2.38  
2.34  
2.29  
1.94

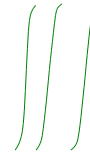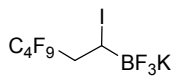

**7**

$^1\text{H}$  NMR (500 MHz,  $\text{CD}_3\text{CN}$ )

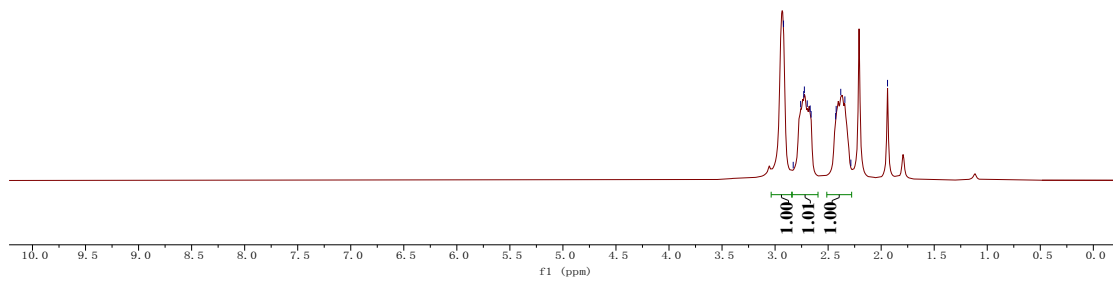

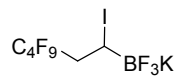

7

<sup>13</sup>C NMR (126 MHz, CD<sub>3</sub>CN)

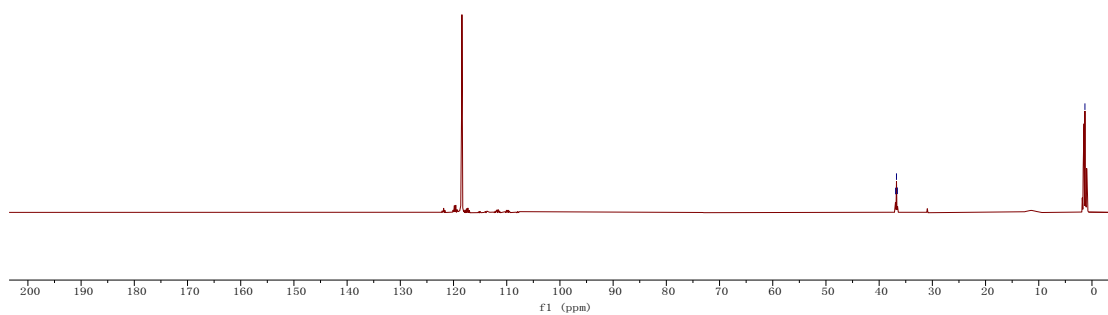

-81.80  
 -81.82  
 -81.84  
 -114.21  
 -114.25  
 -114.28  
 -114.74  
 -114.77  
 -114.81  
 -114.85  
 -114.88  
 -116.33  
 -116.35  
 -116.38  
 -116.41  
 -116.44  
 -116.47  
 -116.92  
 -116.95  
 -116.98  
 -117.01  
 -125.28  
 -125.30  
 -125.32  
 -125.35  
 -126.33  
 -126.36  
 -126.38  
 -126.48  
 -126.51  
 -126.53  
 -149.59  
 -149.67  
 -149.79  
 -149.87

36.91  
36.74  
36.57

-1.32

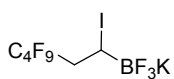

7

<sup>19</sup>F NMR (471 MHz, CD<sub>3</sub>CN)

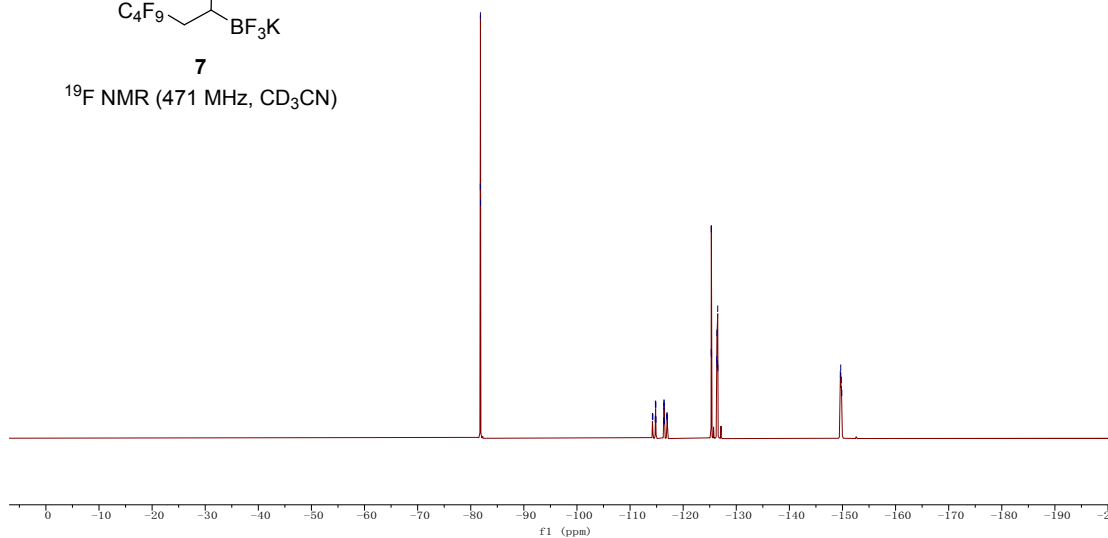

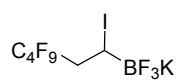

**7**

$^{11}\text{B}$  NMR (128 MHz,  $\text{CD}_3\text{CN}$ )

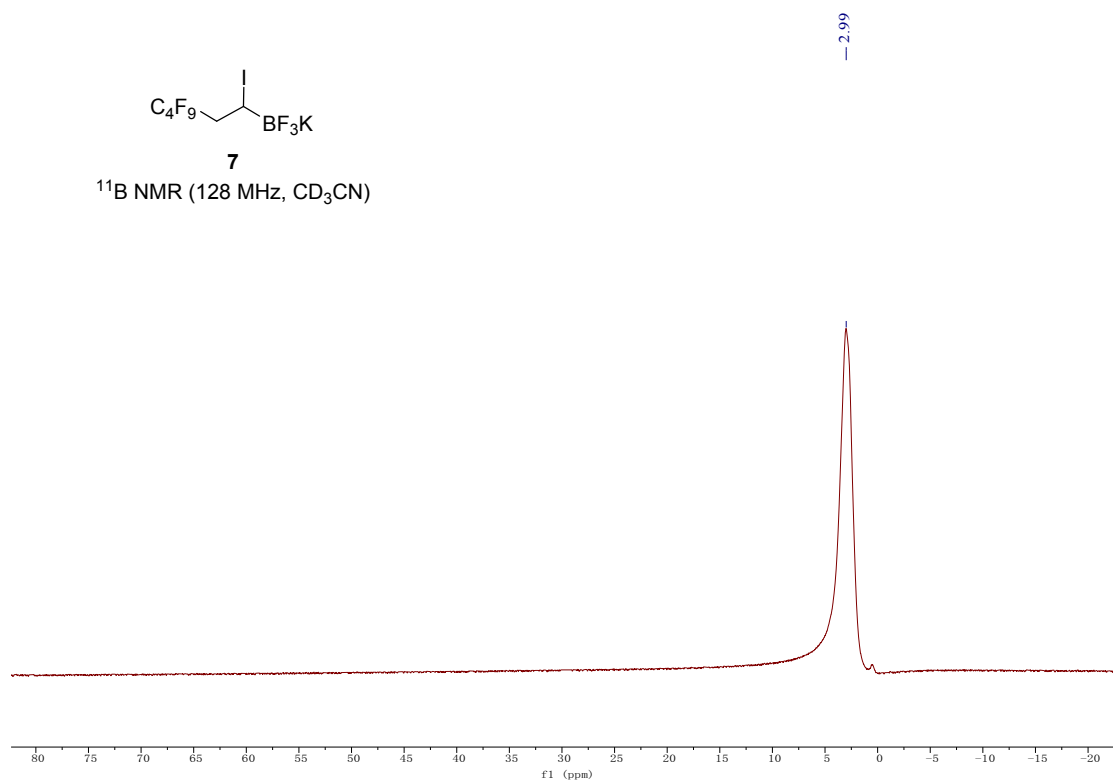

7.91  
7.89  
7.61  
7.59  
7.26

3.43  
3.42  
3.41  
3.40  
3.21  
3.18  
3.18  
3.16  
3.15  
3.14  
3.14  
3.13  
3.09  
2.97  
2.96  
2.94  
2.93  
2.92  
2.92  
2.90  
2.89  
2.87  
2.86  
1.25  
1.24

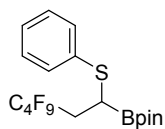

**8a**

$^1\text{H}$  NMR (500 MHz,  $\text{CDCl}_3$ )

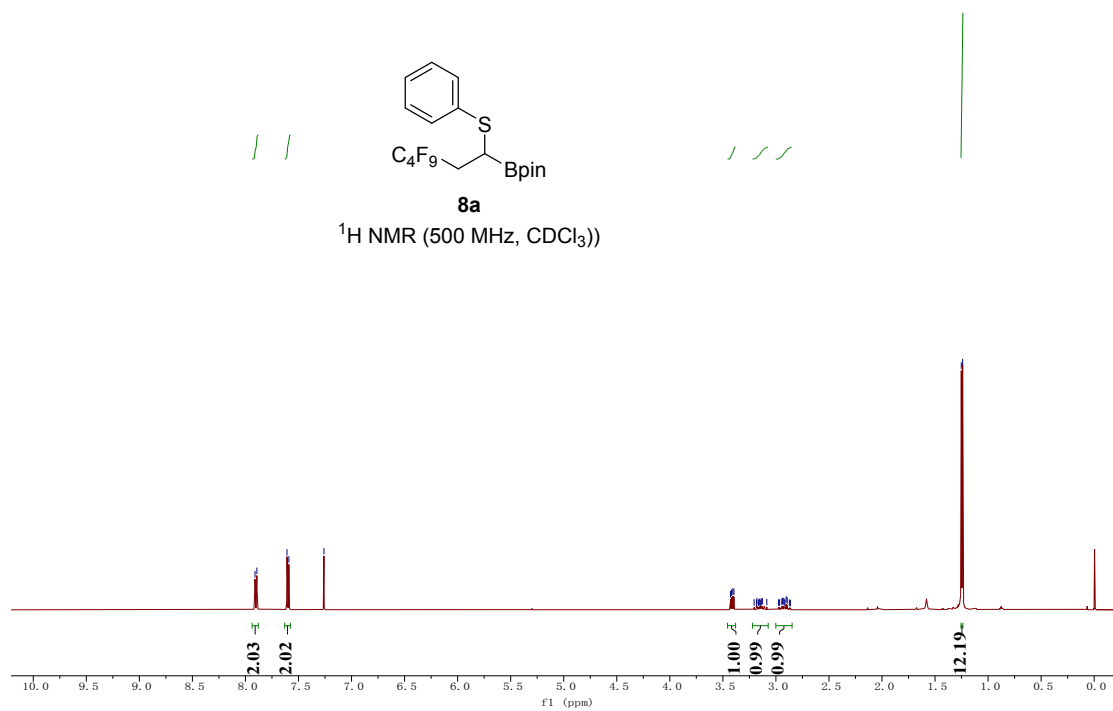

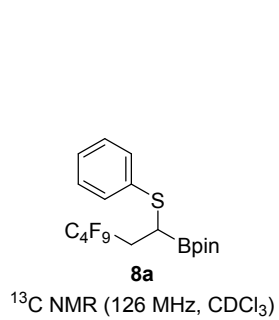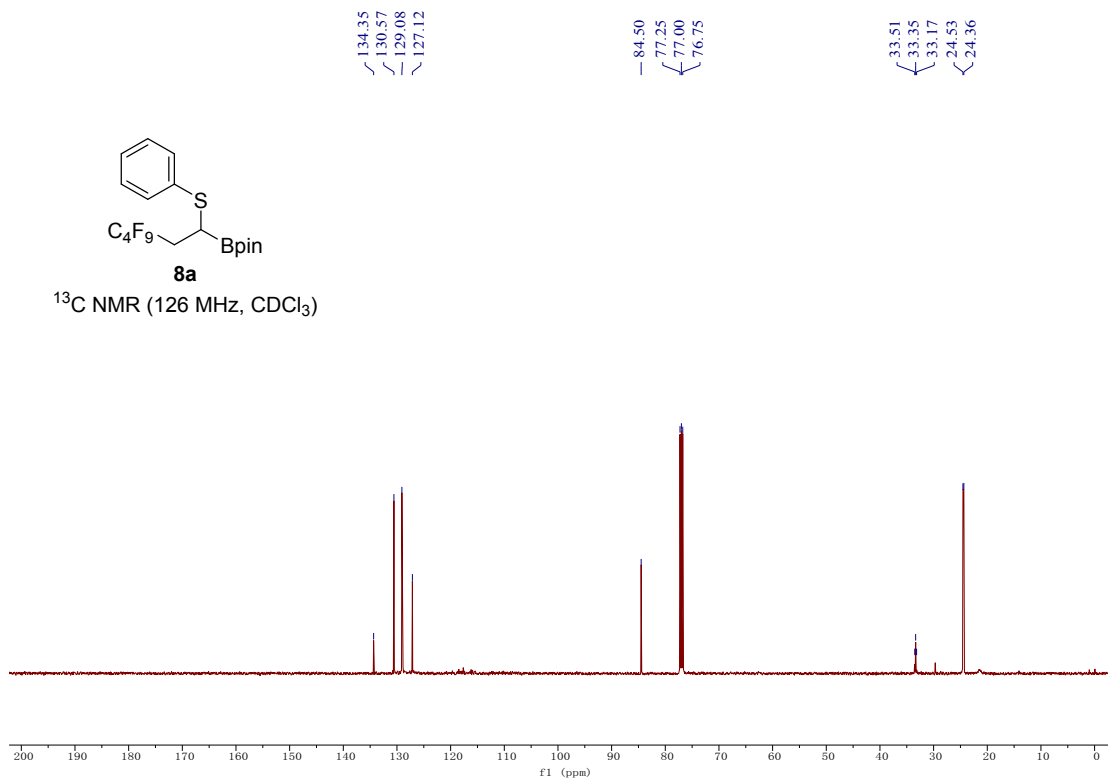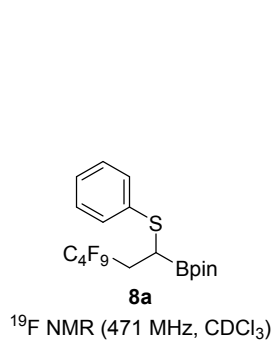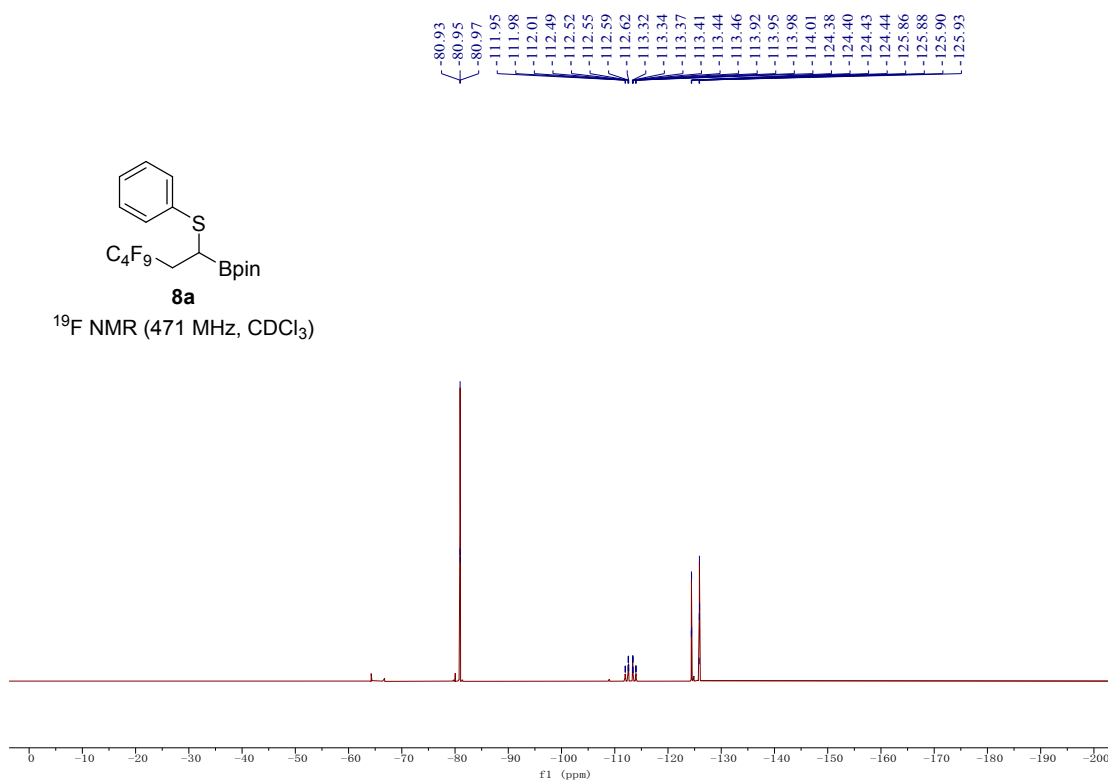

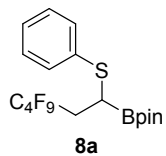

<sup>11</sup>B NMR (128 MHz, CDCl<sub>3</sub>)

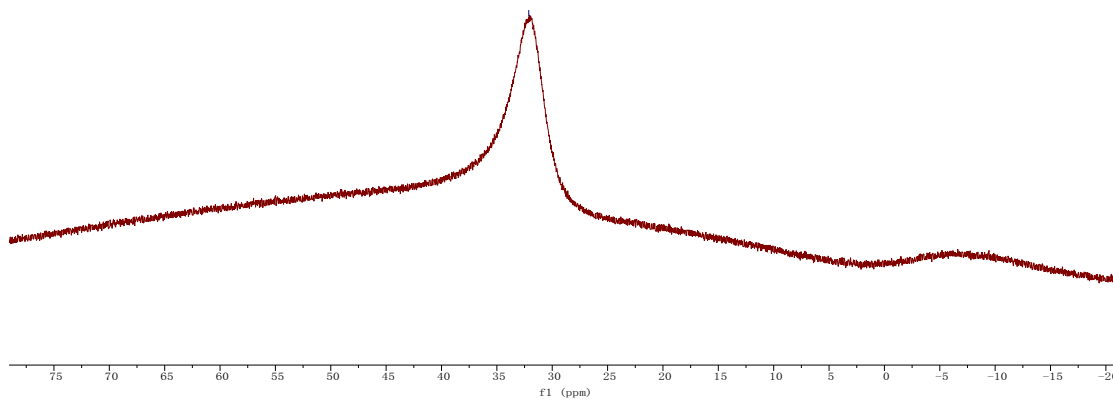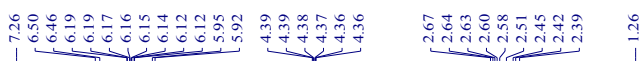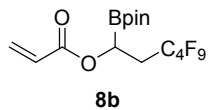

<sup>1</sup>H NMR (400 MHz, CDCl<sub>3</sub>)

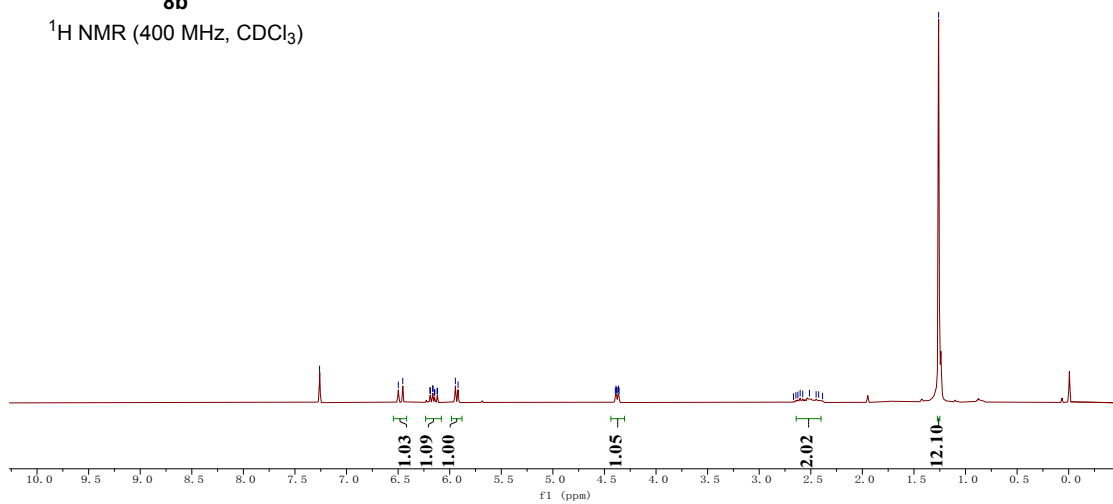



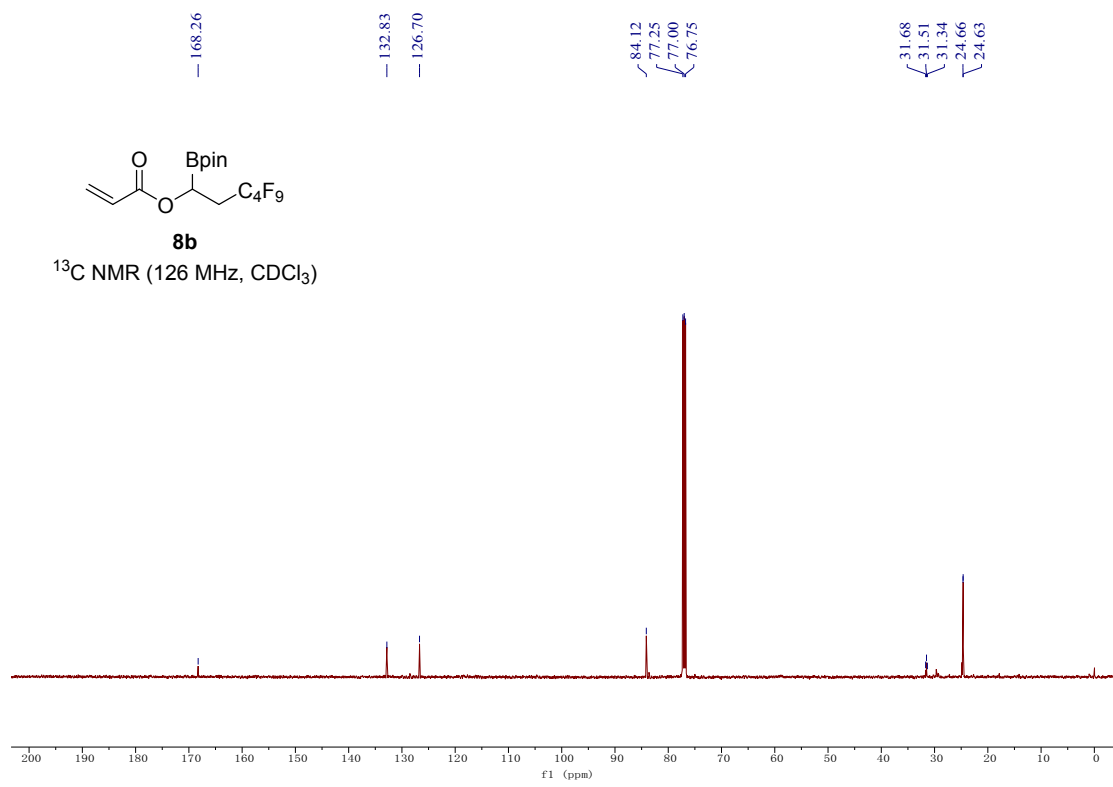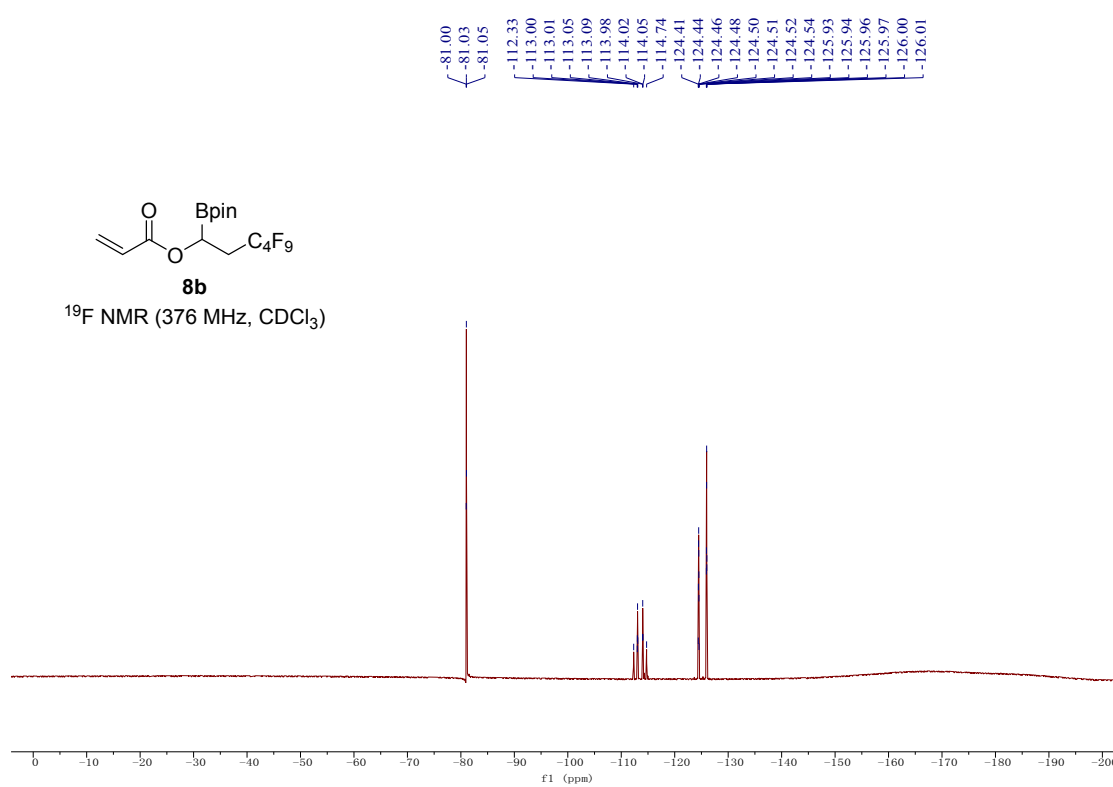

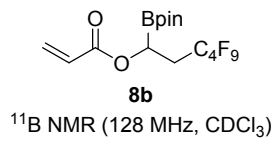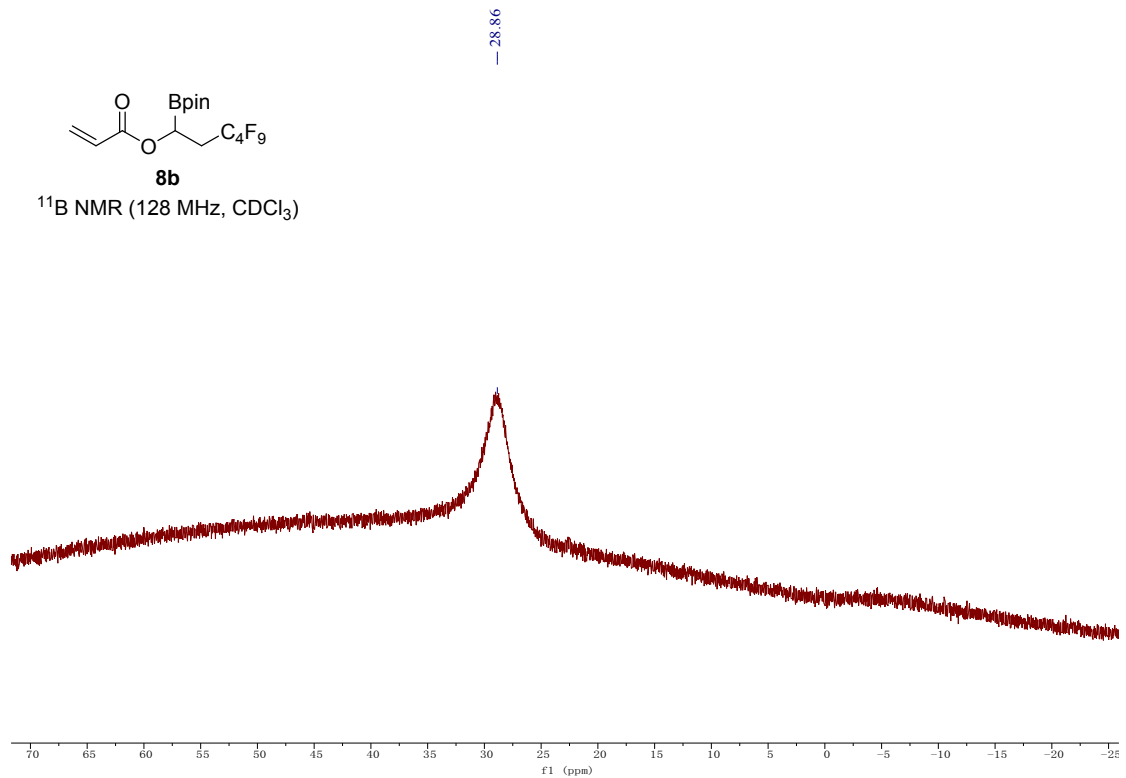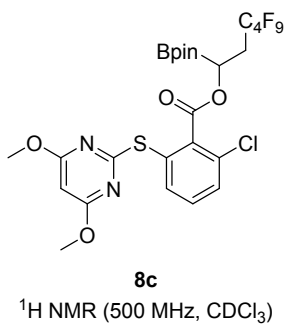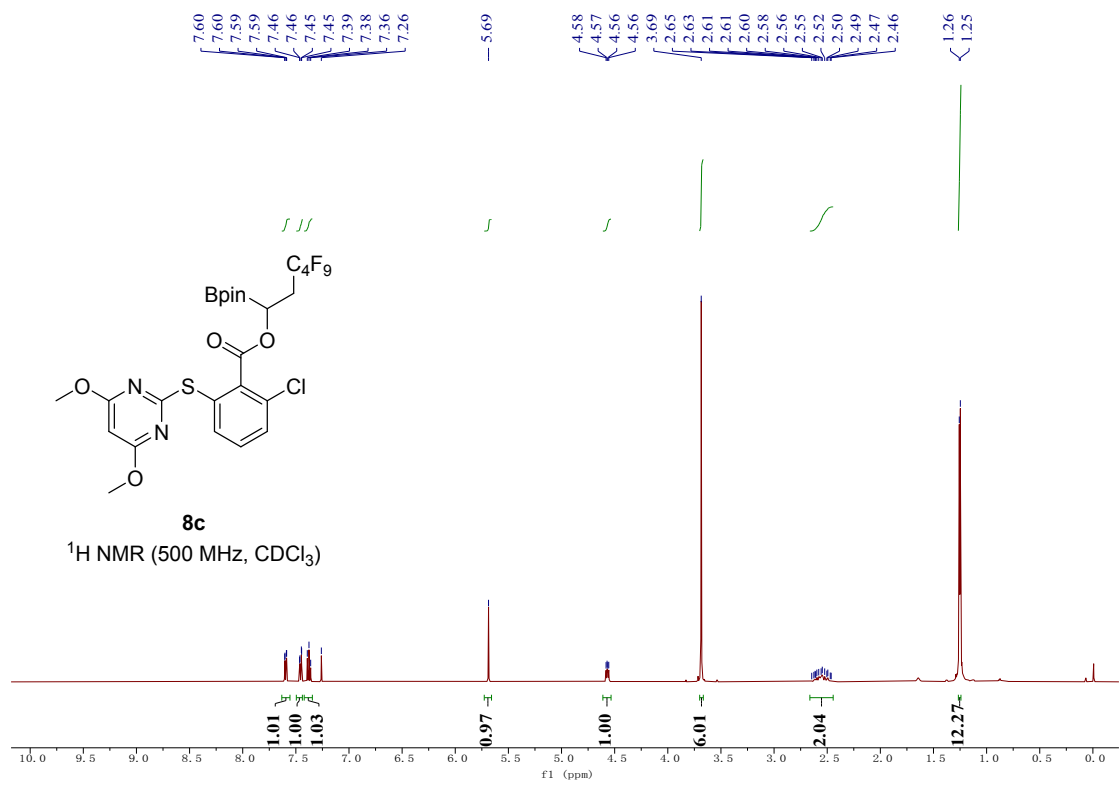

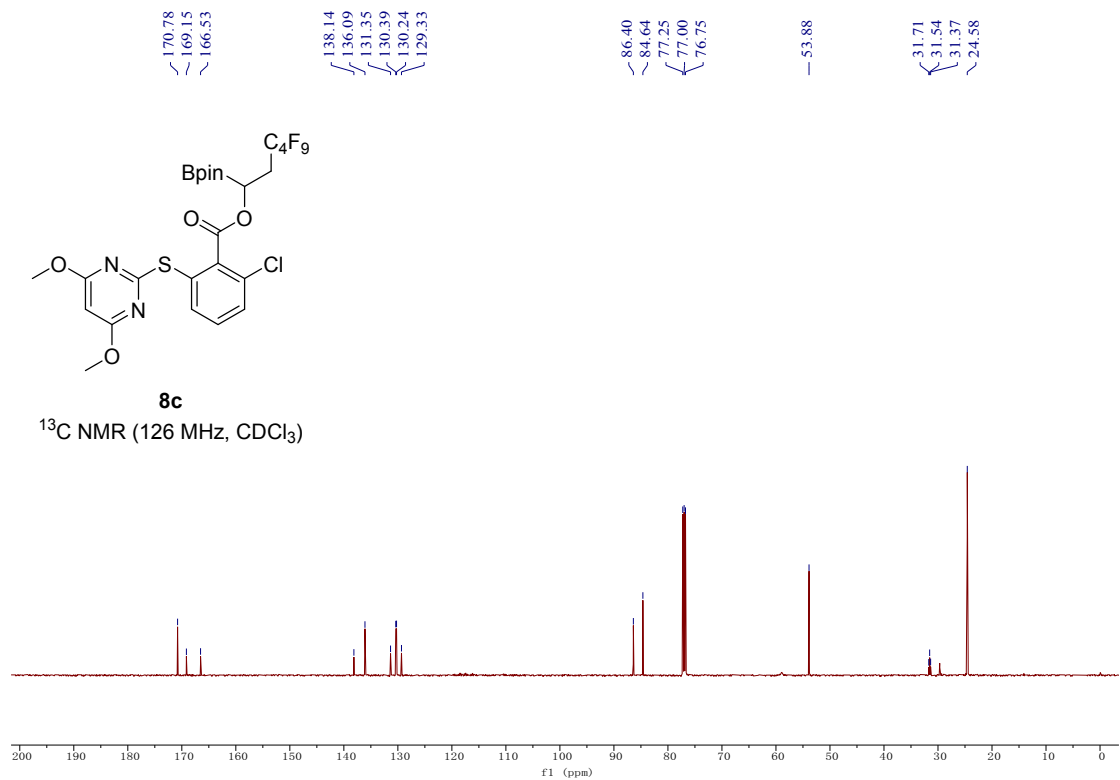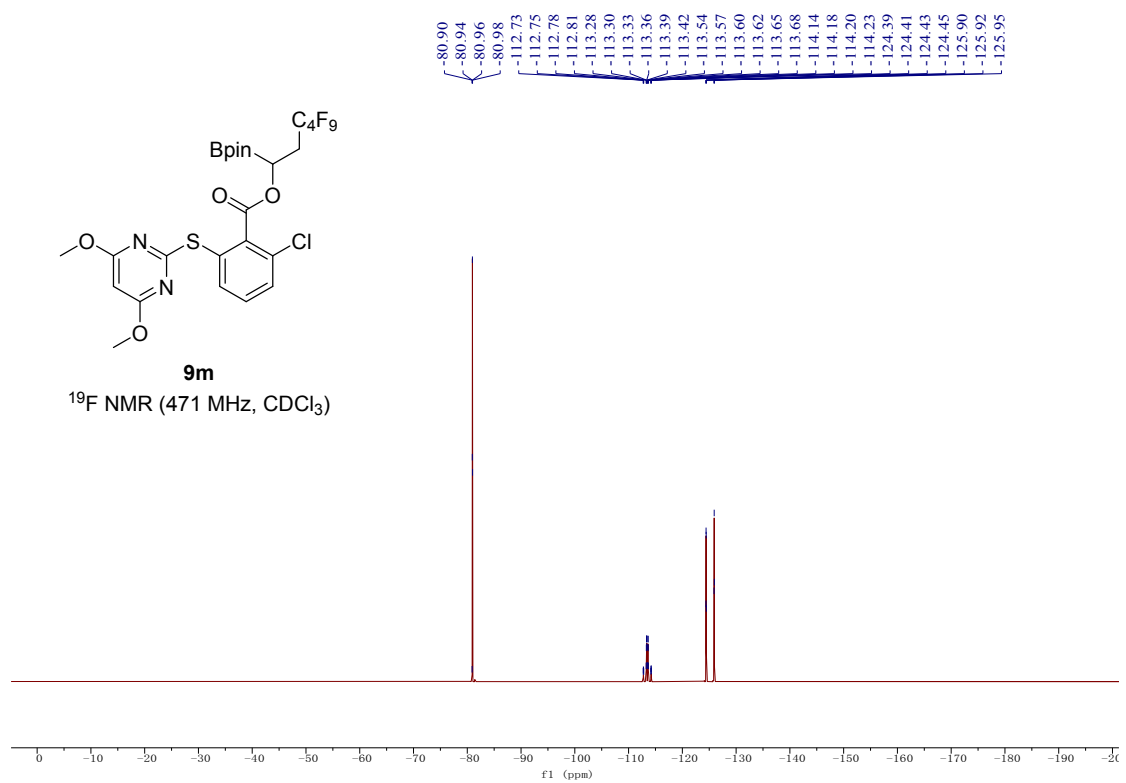

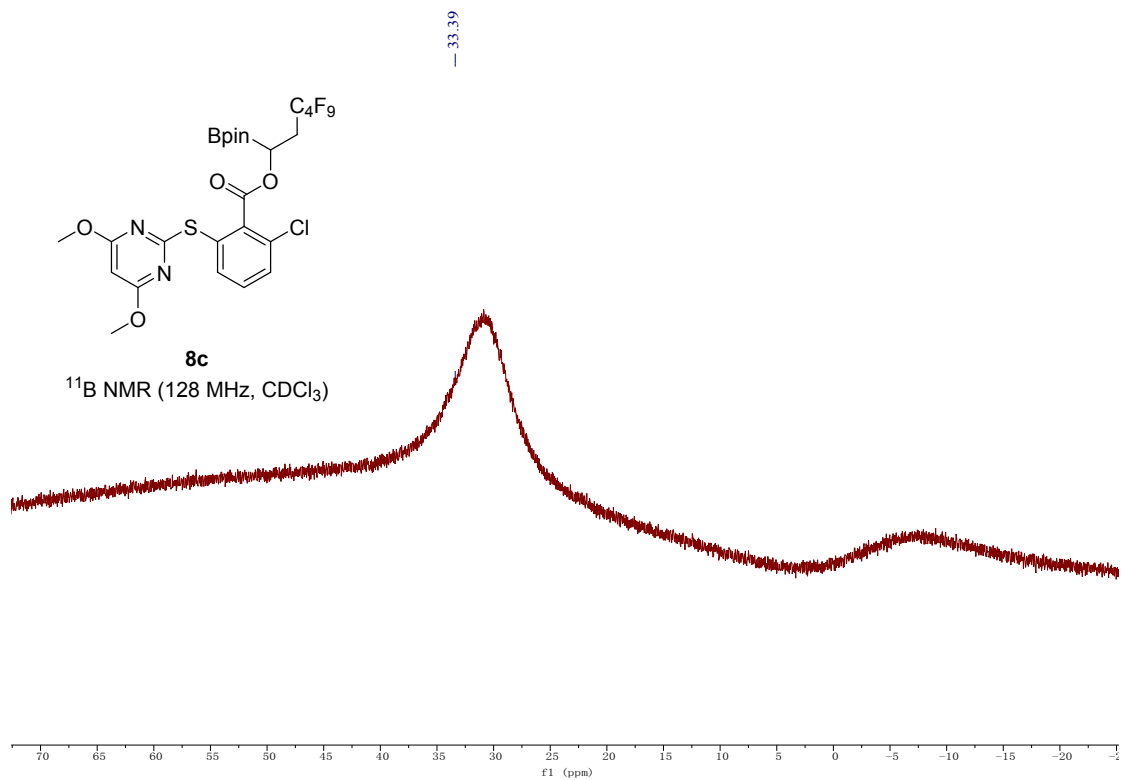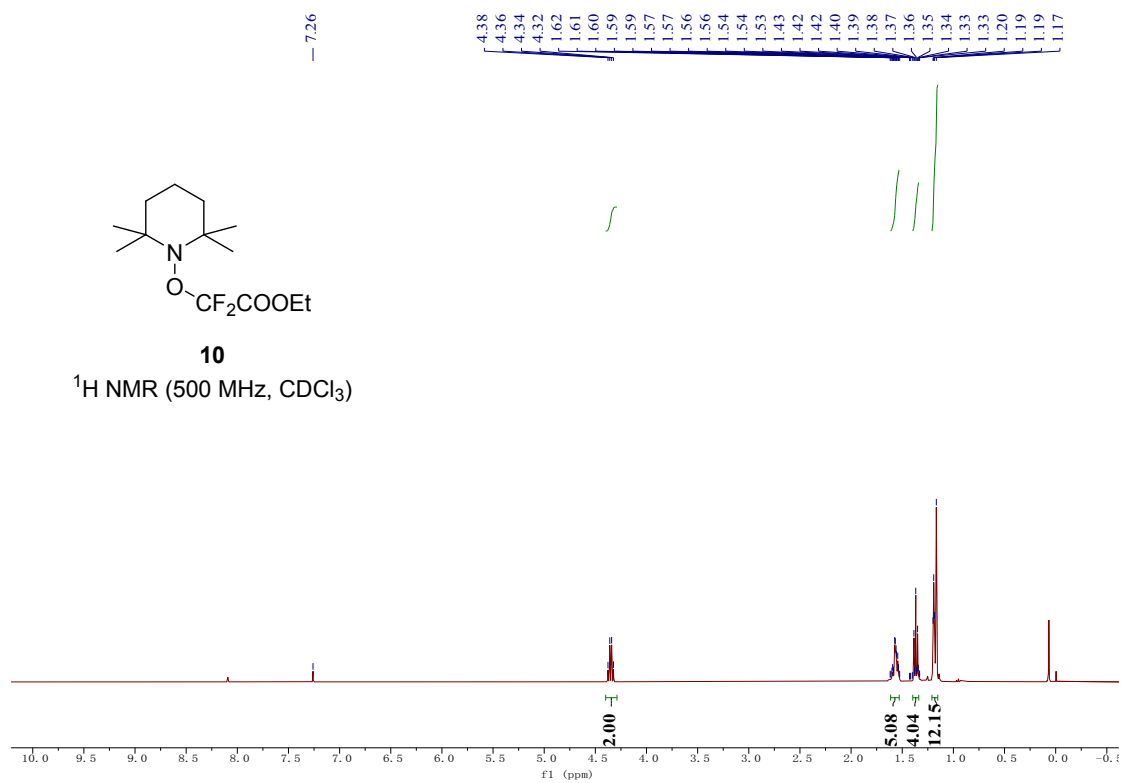

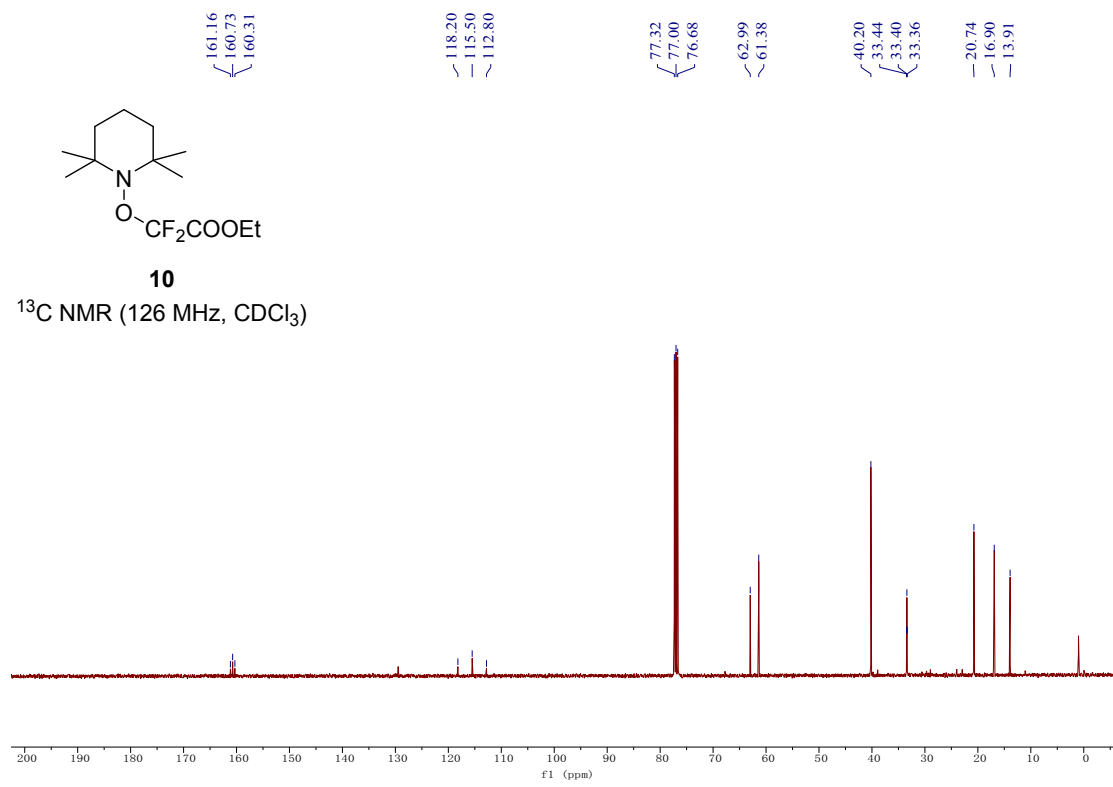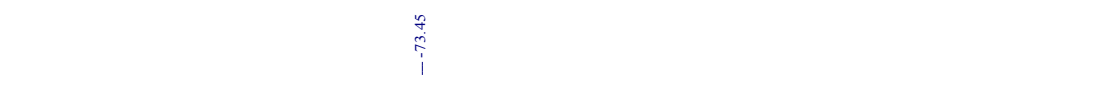

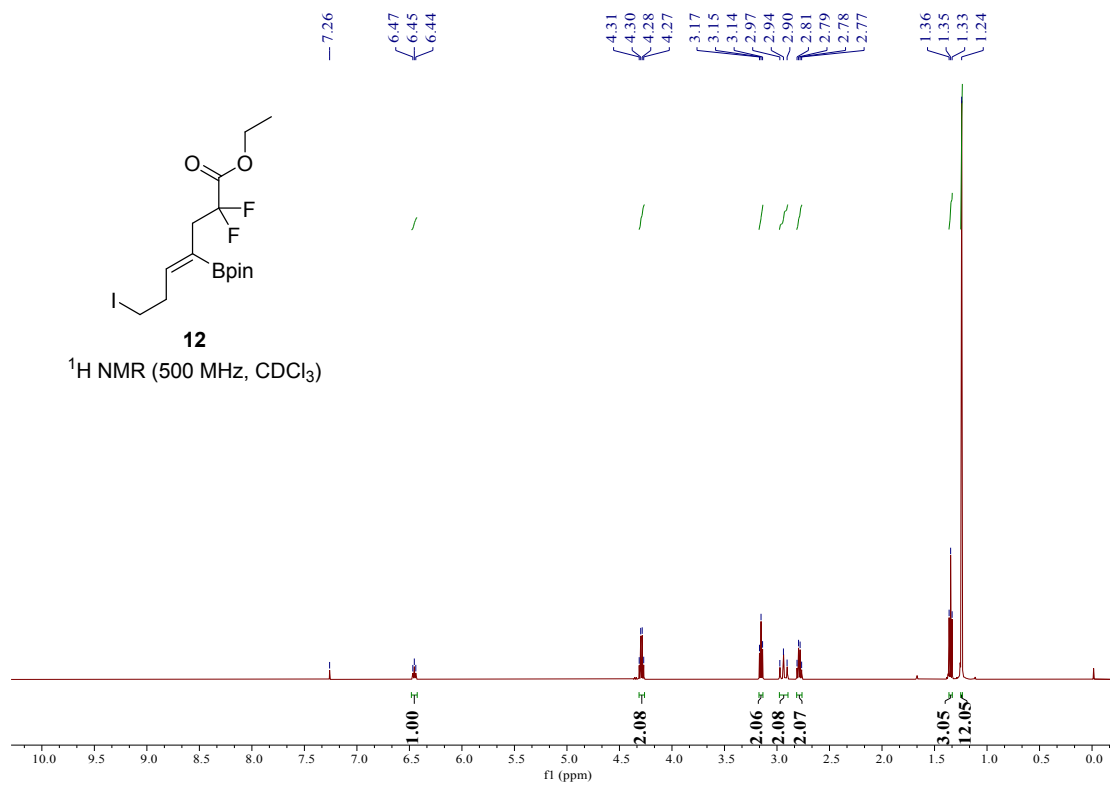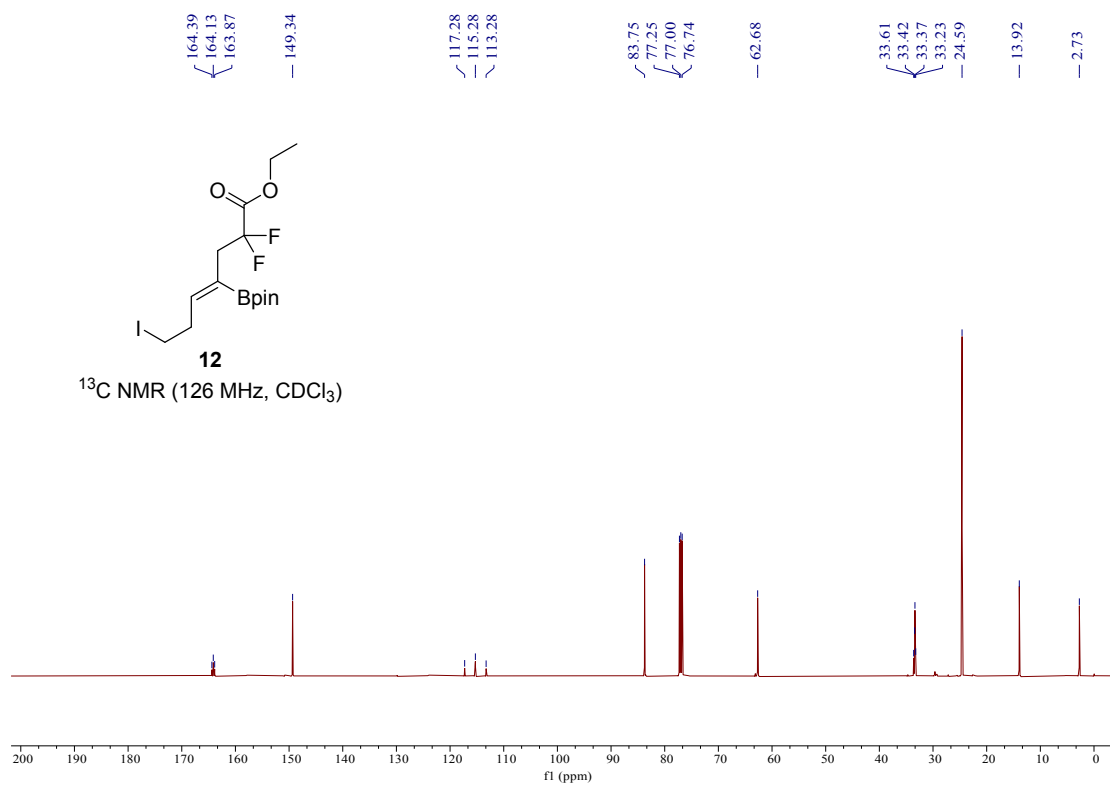

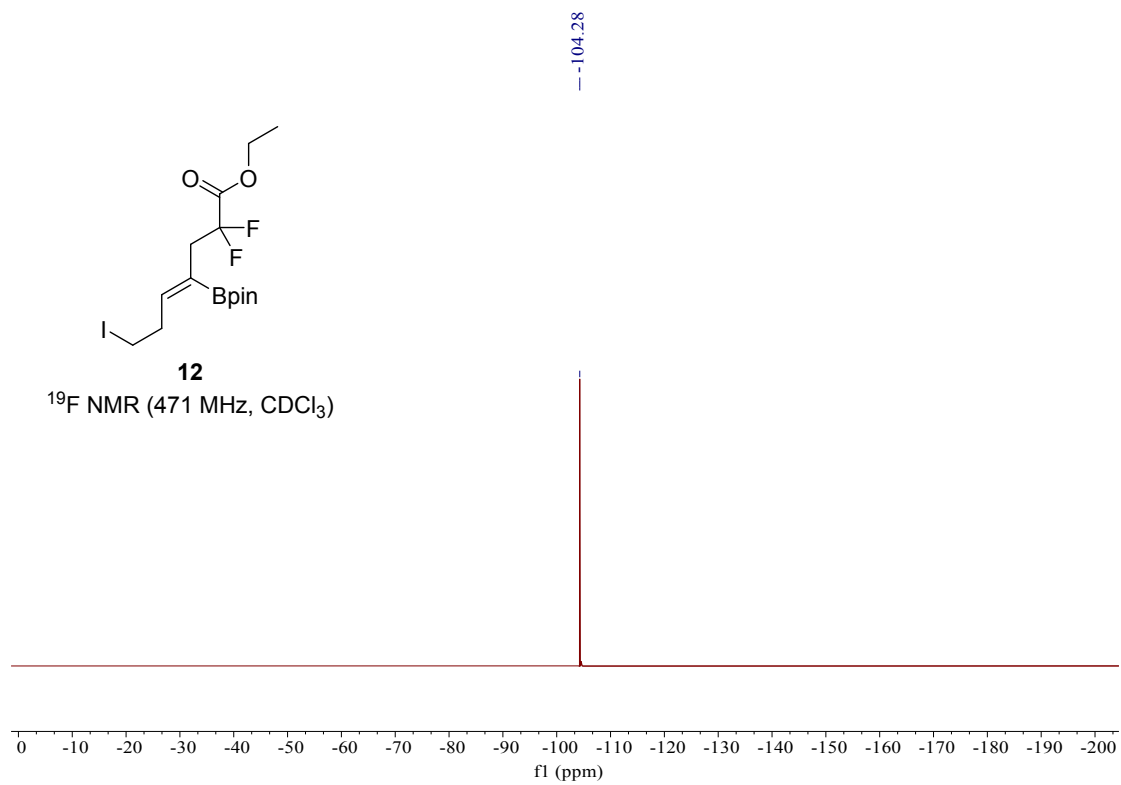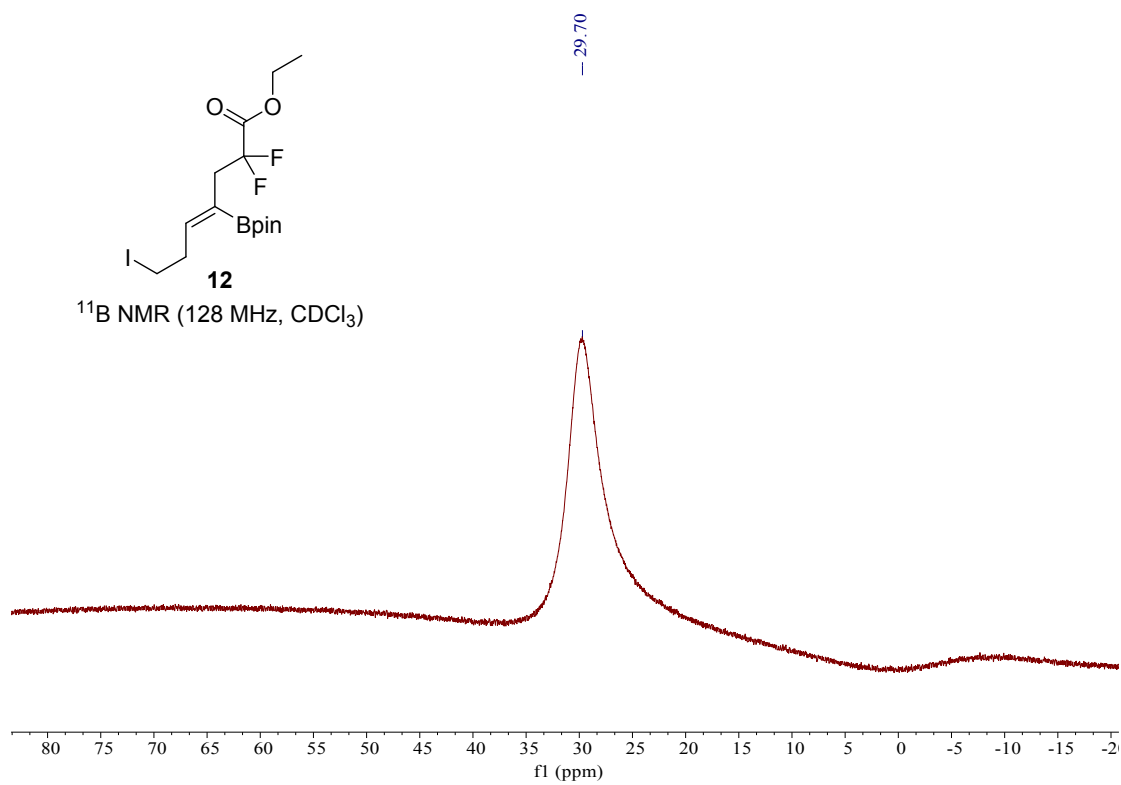

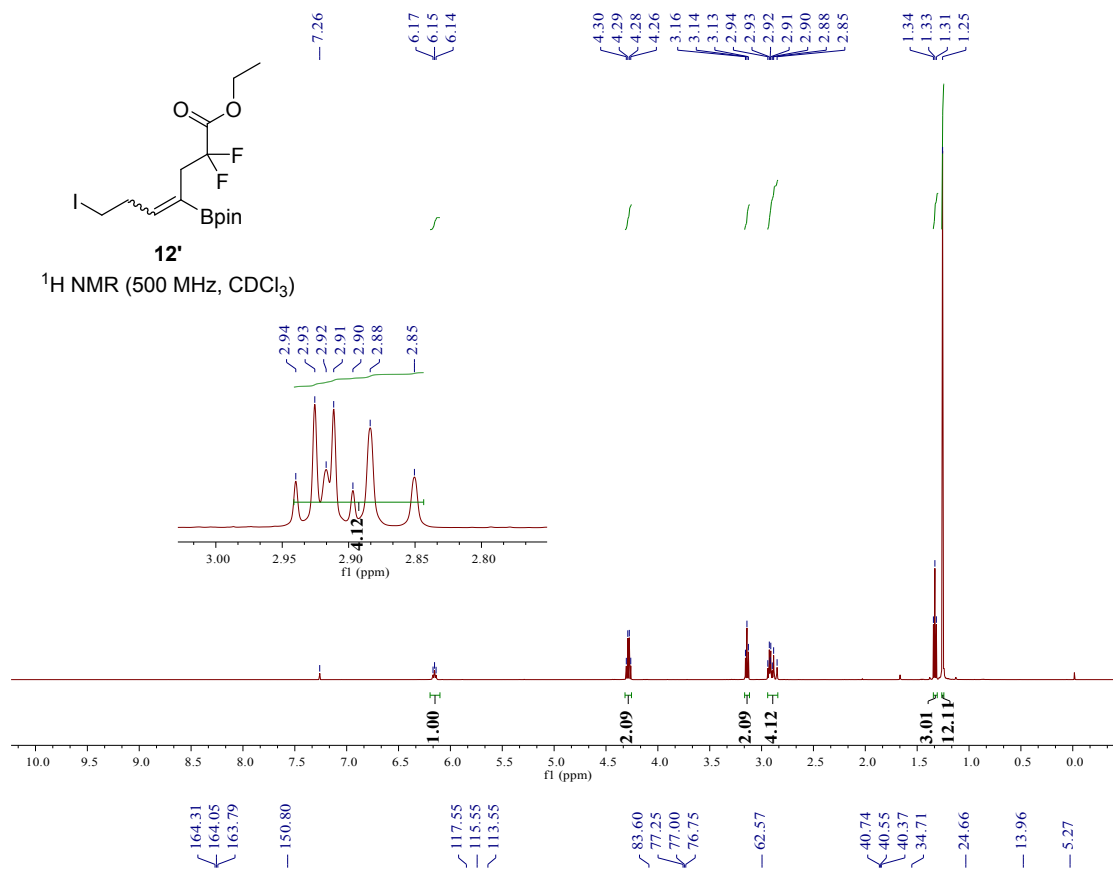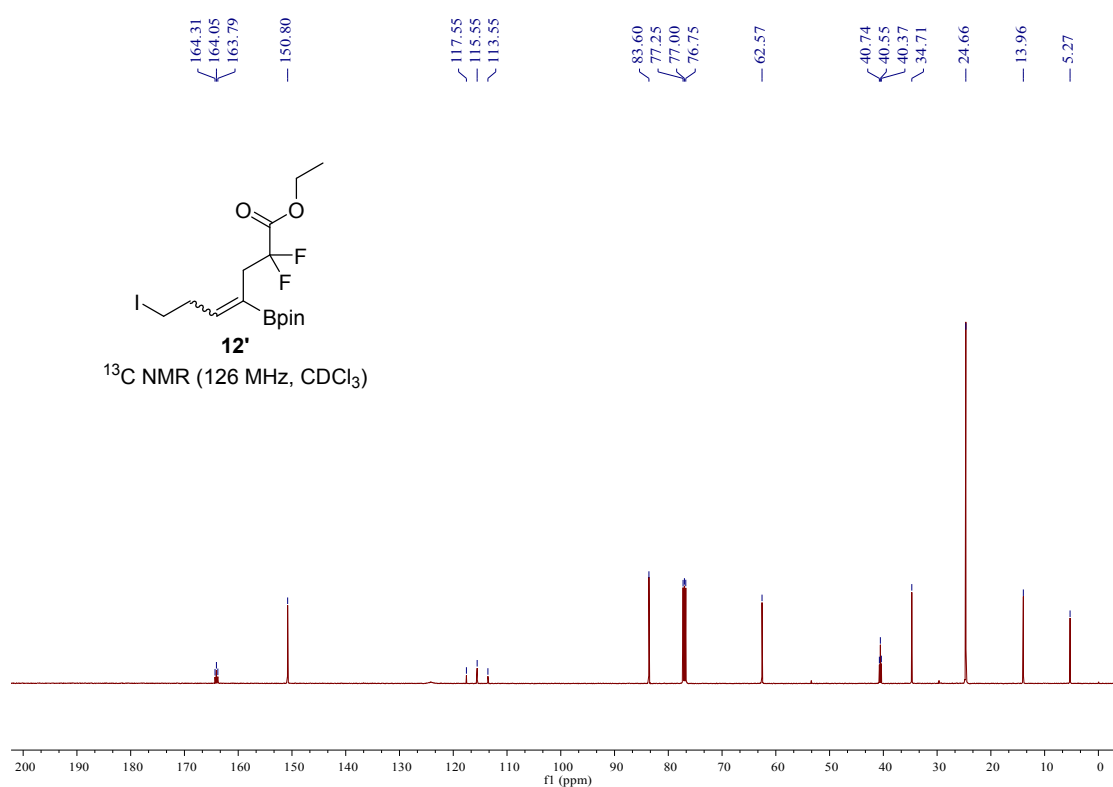



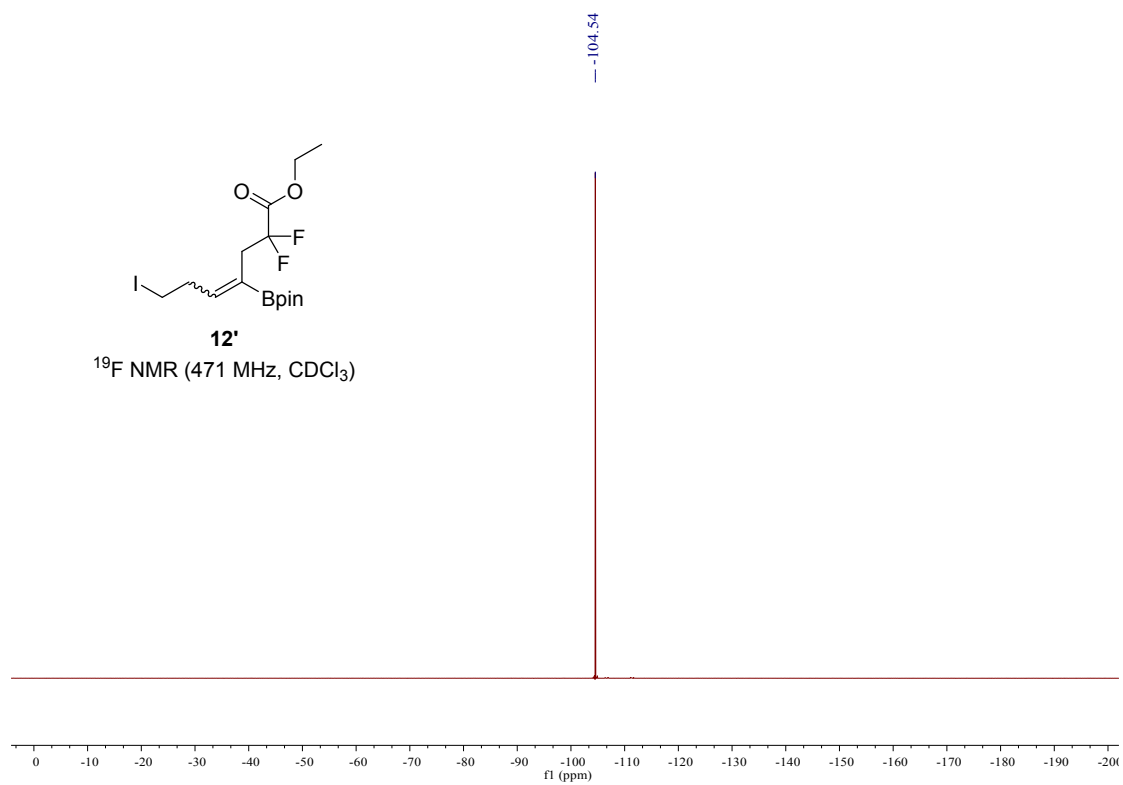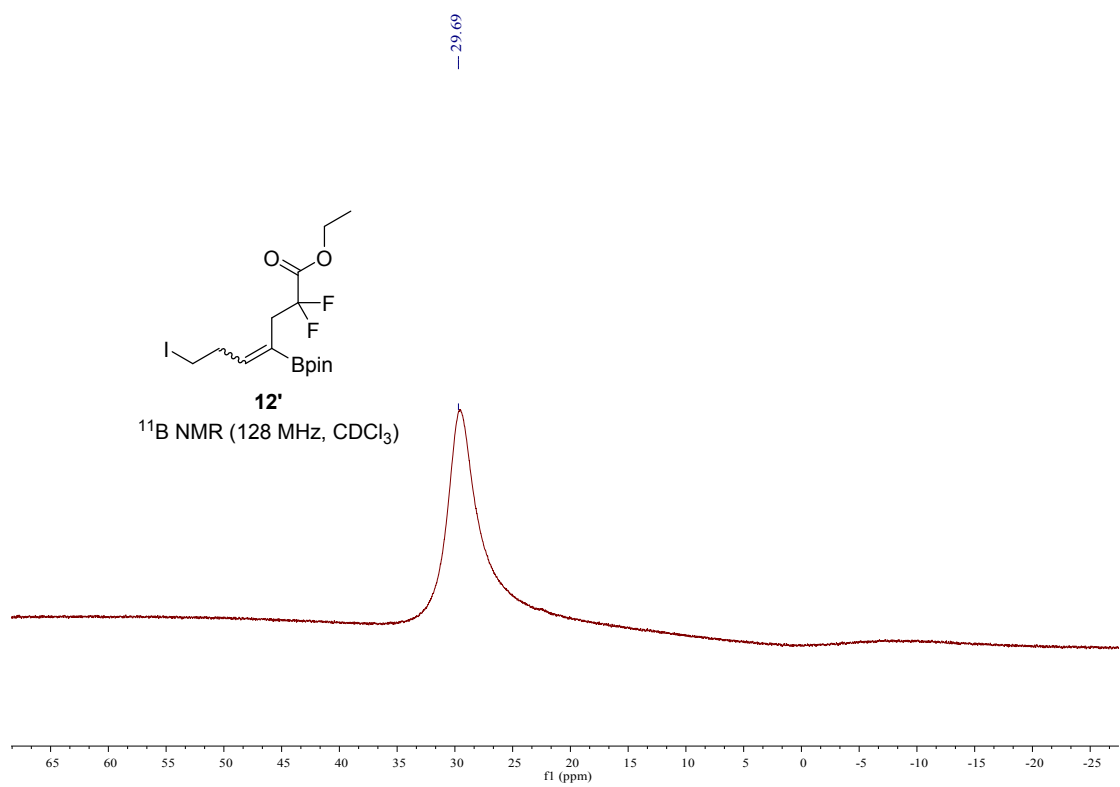

Supplement: d1qo00169h1.pdf [file d1qo00169h1.pdf]
